# Supplementary material for: Unraveling the structural stability and the electronic structure of ThO2 clusters
Source: Royal Society of Chemistry journal article supplement (doi:10.1039/d0cp00478b), 2020-01-01
Supplement: d0cp00478b1.zip [file d0cp00478b1.zip]

# Unraveling the structural stability and the electronic structure of $\text{ThO}_2$ clusters

**Dataset:**

**Stable structures of the  $\text{Th}_n\text{O}_{2n}$  ( $n = 1 - 8$ ) clusters**

Néstor F. Aguirre<sup>1\*</sup>, Julie Jung<sup>1\*</sup>, and Ping Yang<sup>1†</sup>

<sup>1</sup> *Theoretical Division, Los Alamos National Laboratory,  
Los Alamos, New Mexico 87545, United States*

(Dated: January 13, 2020)

---

\* NFA and JJ contributed equally

†Electronic address:pyang@lanl.gov

| ThO <sub>2</sub>                                                                  |                                                                                   |                                                                                    |
|-----------------------------------------------------------------------------------|-----------------------------------------------------------------------------------|------------------------------------------------------------------------------------|
| 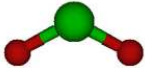 |  |  |
| 1<br>O2Th.q0.m1-2<br>0.00 eV (C1)                                                 | 2<br>O2Th.q0.m1-3<br>5.14 eV (C1)                                                 | 3<br>O2Th.q0.m1-1<br>7.29 eV (C1)                                                  |

| Th <sub>2</sub> O <sub>4</sub>                                                      |                                                                                     |                                                                                     |                                                                                     |                                                                                    |                                                                                     |
|-------------------------------------------------------------------------------------|-------------------------------------------------------------------------------------|-------------------------------------------------------------------------------------|-------------------------------------------------------------------------------------|------------------------------------------------------------------------------------|-------------------------------------------------------------------------------------|
| 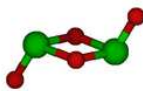   |    |    |    |  |  |
| 1<br>O4Th2.q0.m1-14<br>0.00 eV (C2H)                                                | 2<br>O4Th2.q0.m1-15<br>0.12 eV (CS)                                                 | 3<br>O4Th2.q0.m1-13<br>0.16 eV (C2V)                                                | 4<br>O4Th2.q0.m1-6<br>4.93 eV (C1)                                                  | 5<br>O4Th2.q0.m1-11<br>5.67 eV (C1)                                                | 6<br>O4Th2.q0.m1-5<br>5.67 eV (C1)                                                  |
|    |    |    |    |  |  |
| 7<br>O4Th2.q0.m1-4<br>5.76 eV (C2)                                                  | 8<br>O4Th2.q0.m1-16<br>5.78 eV (C2V)                                                | 9<br>O4Th2.q0.m1-12<br>5.78 eV (C1)                                                 | 10<br>O4Th2.q0.m1-10<br>5.78 eV (C1)                                                | 11<br>O4Th2.q0.m1-9<br>5.81 eV (C1)                                                | 12<br>O4Th2.q0.m1-17<br>5.84 eV (C2V)                                               |
|  |  |  |  |                                                                                    |                                                                                     |
| 13<br>O4Th2.q0.m1-1<br>5.87 eV (CS)                                                 | 14<br>O4Th2.q0.m1-2<br>7.04 eV (CS)                                                 | 15<br>O4Th2.q0.m1-7<br>7.88 eV (C1)                                                 | 16<br>O4Th2.q0.m1-8<br>13.04 eV (C1)                                                |                                                                                    |                                                                                     |

| $\text{Th}_3\text{O}_6$                                                                                                            |                                                                                                                                    |                                                                                                                                    |                                                                                                                                    |                                                                                                                                      |                                                                                                                                      |
|------------------------------------------------------------------------------------------------------------------------------------|------------------------------------------------------------------------------------------------------------------------------------|------------------------------------------------------------------------------------------------------------------------------------|------------------------------------------------------------------------------------------------------------------------------------|--------------------------------------------------------------------------------------------------------------------------------------|--------------------------------------------------------------------------------------------------------------------------------------|
|  <p>1<br/>O6Th3.q0.m1-394<br/>0.00 eV (CS)</p>    |  <p>2<br/>O6Th3.q0.m1-11<br/>0.59 eV (CS)</p>     |  <p>3<br/>O6Th3.q0.m1-4<br/>0.66 eV (C1)</p>      |  <p>4<br/>O6Th3.q0.m1-41<br/>0.70 eV (C1)</p>     |  <p>5<br/>O6Th3.q0.m1-123<br/>0.78 eV (C2V)</p>   |  <p>6<br/>O6Th3.q0.m1-371<br/>0.81 eV (C1)</p>    |
|  <p>7<br/>O6Th3.q0.m1-321<br/>0.89 eV (C3V)</p>   |  <p>8<br/>O6Th3.q0.m1-55<br/>0.90 eV (C1)</p>     |  <p>9<br/>O6Th3.q0.m1-69<br/>0.92 eV (C1)</p>     |  <p>10<br/>O6Th3.q0.m1-219<br/>1.05 eV (C1)</p>   |  <p>11<br/>O6Th3.q0.m1-382<br/>1.49 eV (C1)</p>   |  <p>12<br/>O6Th3.q0.m1-135<br/>1.50 eV (C1)</p>   |
|  <p>13<br/>O6Th3.q0.m1-62<br/>1.73 eV (C3V)</p>   |  <p>14<br/>O6Th3.q0.m1-105<br/>1.85 eV (CS)</p>   |  <p>15<br/>O6Th3.q0.m1-91<br/>4.21 eV (C2V)</p>   |  <p>16<br/>O6Th3.q0.m1-95<br/>4.65 eV (CS)</p>    |  <p>17<br/>O6Th3.q0.m1-247<br/>4.65 eV (C1)</p>   |  <p>18<br/>O6Th3.q0.m1-50<br/>4.79 eV (CS)</p>    |
|  <p>19<br/>O6Th3.q0.m1-171<br/>4.87 eV (C1)</p> |  <p>20<br/>O6Th3.q0.m1-206<br/>4.88 eV (C1)</p> |  <p>21<br/>O6Th3.q0.m1-180<br/>4.91 eV (CS)</p> |  <p>22<br/>O6Th3.q0.m1-360<br/>4.96 eV (C1)</p> |  <p>23<br/>O6Th3.q0.m1-74<br/>5.06 eV (C1)</p>  |  <p>24<br/>O6Th3.q0.m1-22<br/>5.16 eV (C1)</p>  |
|  <p>25<br/>O6Th3.q0.m1-391<br/>5.26 eV (C1)</p> |  <p>26<br/>O6Th3.q0.m1-72<br/>5.29 eV (C1)</p>  |  <p>27<br/>O6Th3.q0.m1-210<br/>5.39 eV (CS)</p> |  <p>28<br/>O6Th3.q0.m1-189<br/>5.37 eV (C1)</p> |  <p>29<br/>O6Th3.q0.m1-146<br/>5.41 eV (C1)</p> |  <p>30<br/>O6Th3.q0.m1-230<br/>5.48 eV (C1)</p> |
|  <p>31<br/>O6Th3.q0.m1-164<br/>5.48 eV (CS)</p> |  <p>32<br/>O6Th3.q0.m1-136<br/>5.53 eV (C1)</p> |  <p>33<br/>O6Th3.q0.m1-212<br/>5.54 eV (CS)</p> |  <p>34<br/>O6Th3.q0.m1-87<br/>5.60 eV (C1)</p>  |  <p>35<br/>O6Th3.q0.m1-364<br/>5.61 eV (C1)</p> |  <p>36<br/>O6Th3.q0.m1-3<br/>5.64 eV (C1)</p>   |

| $\text{Th}_3\text{O}_6$ (Continued from previous page)                              |                                                                                     |                                                                                     |                                                                                     |                                                                                       |                                                                                       |
|-------------------------------------------------------------------------------------|-------------------------------------------------------------------------------------|-------------------------------------------------------------------------------------|-------------------------------------------------------------------------------------|---------------------------------------------------------------------------------------|---------------------------------------------------------------------------------------|
| 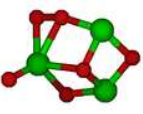   |    |    |    |    |    |
| 37<br>O6Th3.q0.m1-190<br>5.72 eV (C1)                                               | 38<br>O6Th3.q0.m1-116<br>5.73 eV (C1)                                               | 39<br>O6Th3.q0.m1-197<br>5.81 eV (C1)                                               | 40<br>O6Th3.q0.m1-313<br>5.86 eV (C1)                                               | 41<br>O6Th3.q0.m1-153<br>5.88 eV (C1)                                                 | 42<br>O6Th3.q0.m1-59<br>5.96 eV (CS)                                                  |
|    |    |    |    |    |    |
| 43<br>O6Th3.q0.m1-126<br>5.94 eV (C1)                                               | 44<br>O6Th3.q0.m1-372<br>5.98 eV (C1)                                               | 45<br>O6Th3.q0.m1-113<br>5.97 eV (C1)                                               | 46<br>O6Th3.q0.m1-27<br>5.99 eV (C1)                                                | 47<br>O6Th3.q0.m1-19<br>6.01 eV (C1)                                                  | 48<br>O6Th3.q0.m1-308<br>6.03 eV (C1)                                                 |
|    |    |    |    |    |    |
| 49<br>O6Th3.q0.m1-300<br>6.03 eV (C1)                                               | 50<br>O6Th3.q0.m1-237<br>6.04 eV (C1)                                               | 51<br>O6Th3.q0.m1-25<br>6.06 eV (C1)                                                | 52<br>O6Th3.q0.m1-115<br>6.05 eV (C1)                                               | 53<br>O6Th3.q0.m1-262<br>6.09 eV (C1)                                                 | 54<br>O6Th3.q0.m1-129<br>6.11 eV (C1)                                                 |
|   |   |   |   |   |   |
| 55<br>O6Th3.q0.m1-103<br>6.12 eV (C1)                                               | 56<br>O6Th3.q0.m1-134<br>6.14 eV (C1)                                               | 57<br>O6Th3.q0.m1-128<br>6.15 eV (C1)                                               | 58<br>O6Th3.q0.m1-140<br>6.16 eV (C1)                                               | 59<br>O6Th3.q0.m1-156<br>6.16 eV (C1)                                                 | 60<br>O6Th3.q0.m1-179<br>6.17 eV (C1)                                                 |
|  |  |  |  |  |  |
| 61<br>O6Th3.q0.m1-124<br>6.17 eV (C1)                                               | 62<br>O6Th3.q0.m1-17<br>6.17 eV (C1)                                                | 63<br>O6Th3.q0.m1-252<br>6.17 eV (C1)                                               | 64<br>O6Th3.q0.m1-312<br>6.17 eV (C1)                                               | 65<br>O6Th3.q0.m1-182<br>6.18 eV (C1)                                                 | 66<br>O6Th3.q0.m1-106<br>6.19 eV (C1)                                                 |
|  |  |  |  |  |  |
| 67<br>O6Th3.q0.m1-320<br>6.20 eV (C1)                                               | 68<br>O6Th3.q0.m1-161<br>6.20 eV (C1)                                               | 69<br>O6Th3.q0.m1-162<br>6.20 eV (C1)                                               | 70<br>O6Th3.q0.m1-221<br>6.20 eV (C1)                                               | 71<br>O6Th3.q0.m1-258<br>6.22 eV (C1)                                                 | 72<br>O6Th3.q0.m1-154<br>6.24 eV (C1)                                                 |

| $\text{Th}_3\text{O}_6$ (Continued from previous page)                                                                        |                                                                                                                              |                                                                                                                               |                                                                                                                               |                                                                                                                                 |                                                                                                                                 |
|-------------------------------------------------------------------------------------------------------------------------------|------------------------------------------------------------------------------------------------------------------------------|-------------------------------------------------------------------------------------------------------------------------------|-------------------------------------------------------------------------------------------------------------------------------|---------------------------------------------------------------------------------------------------------------------------------|---------------------------------------------------------------------------------------------------------------------------------|
| <br>73<br>O6Th3.q0.m1-366<br>6.25 eV (C1)    | <br>74<br>O6Th3.q0.m1-36<br>6.26 eV (C1)    | <br>75<br>O6Th3.q0.m1-193<br>6.29 eV (C1)    | <br>76<br>O6Th3.q0.m1-160<br>6.31 eV (C1)    | <br>77<br>O6Th3.q0.m1-101<br>6.30 eV (C1)    | <br>78<br>O6Th3.q0.m1-290<br>6.31 eV (C1)    |
| <br>79<br>O6Th3.q0.m1-316<br>6.34 eV (C1)    | <br>80<br>O6Th3.q0.m1-16<br>6.36 eV (C1)    | <br>81<br>O6Th3.q0.m1-303<br>6.33 eV (C1)    | <br>82<br>O6Th3.q0.m1-301<br>6.39 eV (C1)    | <br>83<br>O6Th3.q0.m1-130<br>6.38 eV (C1)    | <br>84<br>O6Th3.q0.m1-49<br>6.52 eV (C1)     |
| <br>85<br>O6Th3.q0.m1-148<br>6.51 eV (C1)    | <br>86<br>O6Th3.q0.m1-159<br>6.50 eV (C1)   | <br>87<br>O6Th3.q0.m1-209<br>6.52 eV (C1)    | <br>88<br>O6Th3.q0.m1-283<br>6.54 eV (C1)    | <br>89<br>O6Th3.q0.m1-45<br>6.56 eV (C1)     | <br>90<br>O6Th3.q0.m1-111<br>6.55 eV (C1)    |
| <br>91<br>O6Th3.q0.m1-351<br>6.57 eV (C1)   | <br>92<br>O6Th3.q0.m1-152<br>6.57 eV (C1)  | <br>93<br>O6Th3.q0.m1-149<br>6.62 eV (C1)   | <br>94<br>O6Th3.q0.m1-122<br>6.62 eV (C1)  | <br>95<br>O6Th3.q0.m1-279<br>6.61 eV (C1)  | <br>96<br>O6Th3.q0.m1-229<br>6.61 eV (C1)   |
| <br>97<br>O6Th3.q0.m1-66<br>6.66 eV (C1)   | <br>98<br>O6Th3.q0.m1-110<br>6.65 eV (C1) | <br>99<br>O6Th3.q0.m1-216<br>6.66 eV (C1)  | <br>100<br>O6Th3.q0.m1-2<br>6.66 eV (C1)   | <br>101<br>O6Th3.q0.m1-93<br>6.69 eV (C1)  | <br>102<br>O6Th3.q0.m1-81<br>6.72 eV (C1)  |
| <br>103<br>O6Th3.q0.m1-125<br>6.72 eV (C1) | <br>104<br>O6Th3.q0.m1-23<br>6.77 eV (C1) | <br>105<br>O6Th3.q0.m1-389<br>6.77 eV (C1) | <br>106<br>O6Th3.q0.m1-248<br>6.77 eV (C1) | <br>107<br>O6Th3.q0.m1-147<br>6.82 eV (C1) | <br>108<br>O6Th3.q0.m1-168<br>6.86 eV (C1) |

| $\text{Th}_3\text{O}_6$ (Continued from previous page)                              |                                                                                     |                                                                                     |                                                                                     |                                                                                       |                                                                                       |
|-------------------------------------------------------------------------------------|-------------------------------------------------------------------------------------|-------------------------------------------------------------------------------------|-------------------------------------------------------------------------------------|---------------------------------------------------------------------------------------|---------------------------------------------------------------------------------------|
| 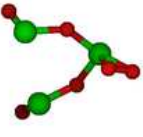   |    |    |    |    |    |
| 109<br>O6Th3.q0.m1-204<br>6.92 eV (C1)                                              | 110<br>O6Th3.q0.m1-286<br>6.94 eV (CS)                                              | 111<br>O6Th3.q0.m1-332<br>7.02 eV (C1)                                              | 112<br>O6Th3.q0.m1-100<br>7.02 eV (C1)                                              | 113<br>O6Th3.q0.m1-184<br>7.03 eV (C1)                                                | 114<br>O6Th3.q0.m1-114<br>7.05 eV (C1)                                                |
|    |    |    |    |    |    |
| 115<br>O6Th3.q0.m1-205<br>7.07 eV (C1)                                              | 116<br>O6Th3.q0.m1-245<br>7.09 eV (C1)                                              | 117<br>O6Th3.q0.m1-70<br>7.11 eV (C1)                                               | 118<br>O6Th3.q0.m1-335<br>7.13 eV (C1)                                              | 119<br>O6Th3.q0.m1-117<br>7.16 eV (C1)                                                | 120<br>O6Th3.q0.m1-158<br>7.17 eV (C1)                                                |
|    |    |    |    |    |    |
| 121<br>O6Th3.q0.m1-145<br>7.19 eV (C1)                                              | 122<br>O6Th3.q0.m1-198<br>7.23 eV (C1)                                              | 123<br>O6Th3.q0.m1-119<br>7.24 eV (C1)                                              | 124<br>O6Th3.q0.m1-386<br>7.25 eV (C1)                                              | 125<br>O6Th3.q0.m1-355<br>7.26 eV (C1)                                                | 126<br>O6Th3.q0.m1-157<br>7.30 eV (C1)                                                |
|  |  |  |  |  |  |
| 127<br>O6Th3.q0.m1-143<br>7.33 eV (C1)                                              | 128<br>O6Th3.q0.m1-267<br>7.36 eV (C1)                                              | 129<br>O6Th3.q0.m1-94<br>7.43 eV (C1)                                               | 130<br>O6Th3.q0.m1-224<br>7.80 eV (C1)                                              | 131<br>O6Th3.q0.m1-131<br>8.03 eV (C1)                                                | 132<br>O6Th3.q0.m1-191<br>8.05 eV (C1)                                                |
|  |  |  |  |  |  |
| 133<br>O6Th3.q0.m1-278<br>8.07 eV (C1)                                              | 134<br>O6Th3.q0.m1-121<br>8.07 eV (C1)                                              | 135<br>O6Th3.q0.m1-104<br>8.09 eV (C1)                                              | 136<br>O6Th3.q0.m1-345<br>8.10 eV (C1)                                              | 137<br>O6Th3.q0.m1-181<br>8.12 eV (C1)                                                | 138<br>O6Th3.q0.m1-139<br>8.18 eV (C1)                                                |
|  |  |  |  |  |  |
| 139<br>O6Th3.q0.m1-280<br>8.20 eV (C1)                                              | 140<br>O6Th3.q0.m1-353<br>8.29 eV (C1)                                              | 141<br>O6Th3.q0.m1-12<br>9.21 eV (C1)                                               | 142<br>O6Th3.q0.m1-285<br>9.24 eV (C1)                                              | 143<br>O6Th3.q0.m1-176<br>9.34 eV (C1)                                                | 144<br>O6Th3.q0.m1-151<br>11.94 eV (C1)                                               |

| Th <sub>3</sub> O <sub>6</sub> ( <i>Continued from previous page</i> )                                                             |                                                                                                                                    |                                                                                                                                    |                                                                                                                                    |                                                                                                                                      |                                                                                                                                      |
|------------------------------------------------------------------------------------------------------------------------------------|------------------------------------------------------------------------------------------------------------------------------------|------------------------------------------------------------------------------------------------------------------------------------|------------------------------------------------------------------------------------------------------------------------------------|--------------------------------------------------------------------------------------------------------------------------------------|--------------------------------------------------------------------------------------------------------------------------------------|
| 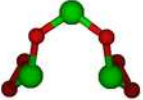 <p>145<br/>O6Th3.q0.m1-26<br/>12.26 eV (C1)</p>  |  <p>146<br/>O6Th3.q0.m1-239<br/>12.33 eV (C1)</p> |  <p>147<br/>O6Th3.q0.m1-96<br/>12.48 eV (C1)</p>  |  <p>148<br/>O6Th3.q0.m1-33<br/>12.55 eV (C1)</p>  |  <p>149<br/>O6Th3.q0.m1-166<br/>13.78 eV (C1)</p> |  <p>150<br/>O6Th3.q0.m1-64<br/>14.31 eV (C1)</p>  |
|  <p>151<br/>O6Th3.q0.m1-266<br/>14.62 eV (C1)</p> |  <p>152<br/>O6Th3.q0.m1-327<br/>14.67 eV (C1)</p> |  <p>153<br/>O6Th3.q0.m1-217<br/>14.72 eV (C1)</p> |  <p>154<br/>O6Th3.q0.m1-304<br/>16.82 eV (C1)</p> |  <p>155<br/>O6Th3.q0.m1-118<br/>17.71 eV (C1)</p> |  <p>156<br/>O6Th3.q0.m1-343<br/>17.70 eV (C1)</p> |
|  <p>157<br/>O6Th3.q0.m1-141<br/>17.77 eV (C1)</p> |                                                                                                                                    |                                                                                                                                    |                                                                                                                                    |                                                                                                                                      |                                                                                                                                      |

| Th <sub>4</sub> O <sub>8</sub>                                                                                               |                                                                                                                              |                                                                                                                              |                                                                                                                              |                                                                                                                                |                                                                                                                               |
|------------------------------------------------------------------------------------------------------------------------------|------------------------------------------------------------------------------------------------------------------------------|------------------------------------------------------------------------------------------------------------------------------|------------------------------------------------------------------------------------------------------------------------------|--------------------------------------------------------------------------------------------------------------------------------|-------------------------------------------------------------------------------------------------------------------------------|
| 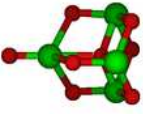<br>1<br>O8Th4.q0.m1-19<br>0.00 eV (C3V)    | <br>2<br>O8Th4.q0.m1-135<br>0.01 eV (CS)    | <br>3<br>O8Th4.q0.m1-111<br>0.06 eV (CS)    | <br>4<br>O8Th4.q0.m1-136<br>0.20 eV (CS)    | <br>5<br>O8Th4.q0.m1-22<br>0.47 eV (C2V)    | <br>6<br>O8Th4.q0.m1-8<br>0.83 eV (C2V)    |
| <br>7<br>O8Th4.q0.m1-99<br>0.89 eV (C1)     | <br>8<br>O8Th4.q0.m1-72<br>1.02 eV (C1)     | <br>9<br>O8Th4.q0.m1-74<br>1.35 eV (C2)     | <br>10<br>O8Th4.q0.m1-53<br>1.35 eV (C2)    | <br>11<br>O8Th4.q0.m1-29<br>1.39 eV (C2V)   | <br>12<br>O8Th4.q0.m1-3<br>1.43 eV (C2V)   |
| <br>13<br>O8Th4.q0.m1-126<br>1.60 eV (C1)   | <br>14<br>O8Th4.q0.m1-131<br>1.87 eV (D2H)  | <br>15<br>O8Th4.q0.m1-83<br>2.13 eV (C1)    | <br>16<br>O8Th4.q0.m1-41<br>2.41 eV (C1)    | <br>17<br>O8Th4.q0.m1-45<br>2.51 eV (C1)    | <br>18<br>O8Th4.q0.m1-82<br>3.69 eV (CS)   |
| <br>19<br>O8Th4.q0.m1-12<br>3.91 eV (CS)  | <br>20<br>O8Th4.q0.m1-17<br>4.20 eV (C1)  | <br>21<br>O8Th4.q0.m1-20<br>4.32 eV (C1)  | <br>22<br>O8Th4.q0.m1-108<br>4.42 eV (CS) | <br>23<br>O8Th4.q0.m1-100<br>4.43 eV (CS) | <br>24<br>O8Th4.q0.m1-73<br>4.61 eV (CS) |
| <br>25<br>O8Th4.q0.m1-15<br>4.89 eV (C1)  | <br>26<br>O8Th4.q0.m1-112<br>4.93 eV (C1) | <br>27<br>O8Th4.q0.m1-133<br>5.14 eV (C1) | <br>28<br>O8Th4.q0.m1-48<br>5.24 eV (C1)  | <br>29<br>O8Th4.q0.m1-2<br>5.23 eV (C1)   | <br>30<br>O8Th4.q0.m1-86<br>5.42 eV (C1) |
| <br>31<br>O8Th4.q0.m1-121<br>5.41 eV (CS) | <br>32<br>O8Th4.q0.m1-37<br>5.45 eV (C1)  | <br>33<br>O8Th4.q0.m1-89<br>5.46 eV (CS)  | <br>34<br>O8Th4.q0.m1-43<br>5.47 eV (C1)  | <br>35<br>O8Th4.q0.m1-104<br>5.53 eV (C1) | <br>36<br>O8Th4.q0.m1-76<br>5.53 eV (C1) |

| $\text{Th}_4\text{O}_8$ (Continued from previous page)                              |                                                                                     |                                                                                     |                                                                                     |                                                                                       |                                                                                       |
|-------------------------------------------------------------------------------------|-------------------------------------------------------------------------------------|-------------------------------------------------------------------------------------|-------------------------------------------------------------------------------------|---------------------------------------------------------------------------------------|---------------------------------------------------------------------------------------|
| 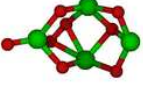   |    |    |    |    |    |
| 37<br>O8Th4.q0.m1-28<br>5.53 eV (C1)                                                | 38<br>O8Th4.q0.m1-117<br>5.56 eV (CS)                                               | 39<br>O8Th4.q0.m1-106<br>5.65 eV (C1)                                               | 40<br>O8Th4.q0.m1-107<br>5.69 eV (C1)                                               | 41<br>O8Th4.q0.m1-59<br>5.72 eV (C1)                                                  | 42<br>O8Th4.q0.m1-132<br>5.81 eV (C1)                                                 |
|    |    |    |    |    |    |
| 43<br>O8Th4.q0.m1-30<br>5.87 eV (C1)                                                | 44<br>O8Th4.q0.m1-23<br>5.93 eV (C1)                                                | 45<br>O8Th4.q0.m1-34<br>5.93 eV (C1)                                                | 46<br>O8Th4.q0.m1-54<br>5.98 eV (C1)                                                | 47<br>O8Th4.q0.m1-95<br>6.08 eV (C1)                                                  | 48<br>O8Th4.q0.m1-101<br>6.13 eV (C1)                                                 |
|    |    |    |    |    |    |
| 49<br>O8Th4.q0.m1-63<br>6.12 eV (CS)                                                | 50<br>O8Th4.q0.m1-84<br>6.25 eV (C1)                                                | 51<br>O8Th4.q0.m1-52<br>6.28 eV (C1)                                                | 52<br>O8Th4.q0.m1-88<br>6.29 eV (C1)                                                | 53<br>O8Th4.q0.m1-10<br>6.29 eV (C1)                                                  | 54<br>O8Th4.q0.m1-11<br>6.41 eV (C1)                                                  |
|  |  |  |  |  |  |
| 55<br>O8Th4.q0.m1-102<br>6.40 eV (C1)                                               | 56<br>O8Th4.q0.m1-114<br>6.49 eV (C1)                                               | 57<br>O8Th4.q0.m1-122<br>6.51 eV (C1)                                               | 58<br>O8Th4.q0.m1-46<br>6.63 eV (C1)                                                | 59<br>O8Th4.q0.m1-85<br>6.65 eV (C1)                                                  | 60<br>O8Th4.q0.m1-55<br>6.65 eV (C1)                                                  |
|  |  |  |  |  |  |
| 61<br>O8Th4.q0.m1-130<br>6.65 eV (C1)                                               | 62<br>O8Th4.q0.m1-25<br>6.68 eV (C1)                                                | 63<br>O8Th4.q0.m1-40<br>6.68 eV (C1)                                                | 64<br>O8Th4.q0.m1-81<br>6.79 eV (C1)                                                | 65<br>O8Th4.q0.m1-33<br>6.78 eV (C1)                                                  | 66<br>O8Th4.q0.m1-128<br>6.82 eV (C1)                                                 |
|  |  |  |  |  |  |
| 67<br>O8Th4.q0.m1-1<br>6.82 eV (C1)                                                 | 68<br>O8Th4.q0.m1-13<br>6.81 eV (C1)                                                | 69<br>O8Th4.q0.m1-64<br>6.93 eV (C1)                                                | 70<br>O8Th4.q0.m1-62<br>6.94 eV (C1)                                                | 71<br>O8Th4.q0.m1-70<br>6.93 eV (C1)                                                  | 72<br>O8Th4.q0.m1-68<br>6.99 eV (C1)                                                  |

| Th <sub>4</sub> O <sub>8</sub> (Continued from previous page)                                                                 |                                                                                                                               |                                                                                                                               |                                                                                                                                |                                                                                                                                 |                                                                                                                                 |
|-------------------------------------------------------------------------------------------------------------------------------|-------------------------------------------------------------------------------------------------------------------------------|-------------------------------------------------------------------------------------------------------------------------------|--------------------------------------------------------------------------------------------------------------------------------|---------------------------------------------------------------------------------------------------------------------------------|---------------------------------------------------------------------------------------------------------------------------------|
| <br>73<br>O8Th4.q0.m1-56<br>7.00 eV (C1)     | <br>74<br>O8Th4.q0.m1-71<br>7.00 eV (C1)     | <br>75<br>O8Th4.q0.m1-125<br>7.01 eV (C1)    | <br>76<br>O8Th4.q0.m1-44<br>7.03 eV (C1)      | <br>77<br>O8Th4.q0.m1-90<br>7.02 eV (C1)     | <br>78<br>O8Th4.q0.m1-7<br>7.04 eV (C1)      |
| <br>79<br>O8Th4.q0.m1-105<br>7.09 eV (C1)    | <br>80<br>O8Th4.q0.m1-66<br>7.05 eV (C1)     | <br>81<br>O8Th4.q0.m1-79<br>7.07 eV (C1)     | <br>82<br>O8Th4.q0.m1-65<br>7.08 eV (C1)      | <br>83<br>O8Th4.q0.m1-97<br>7.17 eV (C1)     | <br>84<br>O8Th4.q0.m1-47<br>7.21 eV (C1)     |
| <br>85<br>O8Th4.q0.m1-27<br>7.23 eV (C1)     | <br>86<br>O8Th4.q0.m1-113<br>7.30 eV (C1)    | <br>87<br>O8Th4.q0.m1-26<br>7.34 eV (C1)     | <br>88<br>O8Th4.q0.m1-4<br>7.85 eV (C1)       | <br>89<br>O8Th4.q0.m1-49<br>7.92 eV (C1)     | <br>90<br>O8Th4.q0.m1-16<br>7.98 eV (CS)     |
| <br>91<br>O8Th4.q0.m1-120<br>8.04 eV (C1)  | <br>92<br>O8Th4.q0.m1-14<br>8.06 eV (C1)   | <br>93<br>O8Th4.q0.m1-109<br>8.29 eV (C1)  | <br>94<br>O8Th4.q0.m1-129<br>8.36 eV (C1)   | <br>95<br>O8Th4.q0.m1-103<br>8.42 eV (C1)  | <br>96<br>O8Th4.q0.m1-123<br>10.43 eV (C1) |
| <br>97<br>O8Th4.q0.m1-91<br>11.81 eV (C1)  | <br>98<br>O8Th4.q0.m1-9<br>12.38 eV (CS)   | <br>99<br>O8Th4.q0.m1-75<br>12.50 eV (C1)  | <br>100<br>O8Th4.q0.m1-110<br>12.56 eV (C1) | <br>101<br>O8Th4.q0.m1-35<br>13.10 eV (CS) | <br>102<br>O8Th4.q0.m1-36<br>13.13 eV (CS) |
| <br>103<br>O8Th4.q0.m1-77<br>13.93 eV (C1) | <br>104<br>O8Th4.q0.m1-92<br>14.46 eV (C1) | <br>105<br>O8Th4.q0.m1-67<br>19.39 eV (C1) |                                                                                                                                |                                                                                                                                 |                                                                                                                                 |

| Th <sub>5</sub> O <sub>10</sub>                                                     |                                                                                     |                                                                                     |                                                                                     |                                                                                       |                                                                                       |
|-------------------------------------------------------------------------------------|-------------------------------------------------------------------------------------|-------------------------------------------------------------------------------------|-------------------------------------------------------------------------------------|---------------------------------------------------------------------------------------|---------------------------------------------------------------------------------------|
| 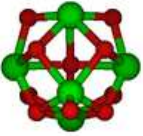   |    |    |    |    |    |
| 1<br>O10Th5.q0.m1-93<br>0.00 eV (C4V)                                               | 2<br>O10Th5.q0.m1-265<br>0.24 eV (CS)                                               | 3<br>O10Th5.q0.m1-34<br>0.29 eV (CS)                                                | 4<br>O10Th5.q0.m1-187<br>0.43 eV (CS)                                               | 5<br>O10Th5.q0.m1-242<br>0.68 eV (CS)                                                 | 6<br>O10Th5.q0.m1-255<br>0.84 eV (CS)                                                 |
|    |    |    |    |    |    |
| 7<br>O10Th5.q0.m1-110<br>0.86 eV (CS)                                               | 8<br>O10Th5.q0.m1-70<br>1.13 eV (C1)                                                | 9<br>O10Th5.q0.m1-224<br>1.13 eV (C1)                                               | 10<br>O10Th5.q0.m1-250<br>1.19 eV (C1)                                              | 11<br>O10Th5.q0.m1-161<br>1.27 eV (C3V)                                               | 12<br>O10Th5.q0.m1-27<br>1.32 eV (C1)                                                 |
|    |    |    |    |    |    |
| 13<br>O10Th5.q0.m1-57<br>1.44 eV (C1)                                               | 14<br>O10Th5.q0.m1-113<br>1.51 eV (CS)                                              | 15<br>O10Th5.q0.m1-149<br>1.73 eV (C1)                                              | 16<br>O10Th5.q0.m1-68<br>1.79 eV (CS)                                               | 17<br>O10Th5.q0.m1-218<br>1.81 eV (C1)                                                | 18<br>O10Th5.q0.m1-268<br>1.85 eV (C1)                                                |
|  |  |  |  |  |  |
| 19<br>O10Th5.q0.m1-216<br>1.85 eV (C1)                                              | 20<br>O10Th5.q0.m1-121<br>1.84 eV (C1)                                              | 21<br>O10Th5.q0.m1-109<br>1.85 eV (CS)                                              | 22<br>O10Th5.q0.m1-56<br>1.90 eV (C2V)                                              | 23<br>O10Th5.q0.m1-37<br>1.92 eV (C1)                                                 | 24<br>O10Th5.q0.m1-232<br>1.95 eV (C2)                                                |
|  |  |  |  |  |  |
| 25<br>O10Th5.q0.m1-210<br>2.03 eV (C1)                                              | 26<br>O10Th5.q0.m1-41<br>2.06 eV (C1)                                               | 27<br>O10Th5.q0.m1-199<br>2.11 eV (C1)                                              | 28<br>O10Th5.q0.m1-256<br>2.13 eV (CS)                                              | 29<br>O10Th5.q0.m1-163<br>2.23 eV (C1)                                                | 30<br>O10Th5.q0.m1-166<br>2.23 eV (CS)                                                |
|  |  |  |  |  |  |
| 31<br>O10Th5.q0.m1-119<br>2.24 eV (C2)                                              | 32<br>O10Th5.q0.m1-168<br>2.28 eV (CS)                                              | 33<br>O10Th5.q0.m1-225<br>2.35 eV (C1)                                              | 34<br>O10Th5.q0.m1-55<br>2.52 eV (CS)                                               | 35<br>O10Th5.q0.m1-214<br>2.80 eV (C1)                                                | 36<br>O10Th5.q0.m1-155<br>2.84 eV (C2V)                                               |

| Th <sub>5</sub> O <sub>10</sub> (Continued from previous page)                                                                |                                                                                                                               |                                                                                                                               |                                                                                                                               |                                                                                                                                 |                                                                                                                                 |
|-------------------------------------------------------------------------------------------------------------------------------|-------------------------------------------------------------------------------------------------------------------------------|-------------------------------------------------------------------------------------------------------------------------------|-------------------------------------------------------------------------------------------------------------------------------|---------------------------------------------------------------------------------------------------------------------------------|---------------------------------------------------------------------------------------------------------------------------------|
| 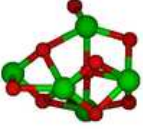<br>37<br>O10Th5.q0.m1-51<br>2.92 eV (C1)    | <br>38<br>O10Th5.q0.m1-169<br>2.99 eV (C1)   | <br>39<br>O10Th5.q0.m1-235<br>3.02 eV (C1)   | <br>40<br>O10Th5.q0.m1-118<br>3.03 eV (C1)   | <br>41<br>O10Th5.q0.m1-241<br>3.33 eV (C1)   | <br>42<br>O10Th5.q0.m1-108<br>3.51 eV (C1)   |
| <br>43<br>O10Th5.q0.m1-249<br>4.72 eV (C1)   | <br>44<br>O10Th5.q0.m1-132<br>4.90 eV (C1)   | <br>45<br>O10Th5.q0.m1-99<br>5.02 eV (CS)    | <br>46<br>O10Th5.q0.m1-139<br>5.02 eV (C1)   | <br>47<br>O10Th5.q0.m1-117<br>5.13 eV (CS)   | <br>48<br>O10Th5.q0.m1-31<br>5.14 eV (C1)    |
| <br>49<br>O10Th5.q0.m1-25<br>5.20 eV (C1)    | <br>50<br>O10Th5.q0.m1-128<br>5.24 eV (C1)   | <br>51<br>O10Th5.q0.m1-146<br>5.25 eV (C1)   | <br>52<br>O10Th5.q0.m1-95<br>5.29 eV (C1)    | <br>53<br>O10Th5.q0.m1-180<br>5.30 eV (C1)   | <br>54<br>O10Th5.q0.m1-176<br>5.34 eV (C1)   |
| <br>55<br>O10Th5.q0.m1-186<br>5.35 eV (C1) | <br>56<br>O10Th5.q0.m1-79<br>5.38 eV (C1)  | <br>57<br>O10Th5.q0.m1-131<br>5.36 eV (C1) | <br>58<br>O10Th5.q0.m1-115<br>5.41 eV (C1) | <br>59<br>O10Th5.q0.m1-42<br>5.56 eV (C1)  | <br>60<br>O10Th5.q0.m1-237<br>5.54 eV (C1) |
| <br>61<br>O10Th5.q0.m1-72<br>5.56 eV (C1)  | <br>62<br>O10Th5.q0.m1-52<br>5.57 eV (C1)  | <br>63<br>O10Th5.q0.m1-171<br>5.57 eV (C1) | <br>64<br>O10Th5.q0.m1-47<br>5.60 eV (C1)  | <br>65<br>O10Th5.q0.m1-61<br>5.59 eV (C1)  | <br>66<br>O10Th5.q0.m1-74<br>5.67 eV (C1)  |
| <br>67<br>O10Th5.q0.m1-140<br>5.66 eV (C1) | <br>68<br>O10Th5.q0.m1-151<br>5.73 eV (C1) | <br>69<br>O10Th5.q0.m1-188<br>5.76 eV (CS) | <br>70<br>O10Th5.q0.m1-130<br>5.78 eV (CS) | <br>71<br>O10Th5.q0.m1-231<br>5.81 eV (C1) | <br>72<br>O10Th5.q0.m1-251<br>5.92 eV (C1) |

| $\text{Th}_5\text{O}_{10}$ (Continued from previous page)                           |                                                                                     |                                                                                     |                                                                                     |                                                                                       |                                                                                       |
|-------------------------------------------------------------------------------------|-------------------------------------------------------------------------------------|-------------------------------------------------------------------------------------|-------------------------------------------------------------------------------------|---------------------------------------------------------------------------------------|---------------------------------------------------------------------------------------|
| 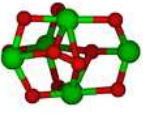   |    |    |    |    |    |
| 73<br>O10Th5.q0.m1-92<br>5.92 eV (C1)                                               | 74<br>O10Th5.q0.m1-62<br>5.92 eV (C1)                                               | 75<br>O10Th5.q0.m1-145<br>5.95 eV (C1)                                              | 76<br>O10Th5.q0.m1-152<br>5.95 eV (C1)                                              | 77<br>O10Th5.q0.m1-1<br>5.96 eV (C1)                                                  | 78<br>O10Th5.q0.m1-211<br>5.96 eV (C1)                                                |
|    |    |    |    |    |    |
| 79<br>O10Th5.q0.m1-32<br>6.04 eV (C1)                                               | 80<br>O10Th5.q0.m1-20<br>6.05 eV (C1)                                               | 81<br>O10Th5.q0.m1-17<br>6.04 eV (C1)                                               | 82<br>O10Th5.q0.m1-124<br>6.07 eV (C1)                                              | 83<br>O10Th5.q0.m1-71<br>6.10 eV (C1)                                                 | 84<br>O10Th5.q0.m1-63<br>6.09 eV (C1)                                                 |
|    |    |    |    |    |    |
| 85<br>O10Th5.q0.m1-122<br>6.11 eV (C1)                                              | 86<br>O10Th5.q0.m1-85<br>6.13 eV (C1)                                               | 87<br>O10Th5.q0.m1-59<br>6.17 eV (C1)                                               | 88<br>O10Th5.q0.m1-78<br>6.16 eV (C1)                                               | 89<br>O10Th5.q0.m1-58<br>6.20 eV (C1)                                                 | 90<br>O10Th5.q0.m1-141<br>6.21 eV (C1)                                                |
|  |  |  |  |  |  |
| 91<br>O10Th5.q0.m1-138<br>6.23 eV (C1)                                              | 92<br>O10Th5.q0.m1-246<br>6.25 eV (C1)                                              | 93<br>O10Th5.q0.m1-123<br>6.24 eV (C1)                                              | 94<br>O10Th5.q0.m1-98<br>6.31 eV (C1)                                               | 95<br>O10Th5.q0.m1-60<br>6.34 eV (C1)                                                 | 96<br>O10Th5.q0.m1-13<br>6.35 eV (C1)                                                 |
|  |  |  |  |  |  |
| 97<br>O10Th5.q0.m1-147<br>6.35 eV (C1)                                              | 98<br>O10Th5.q0.m1-136<br>6.35 eV (C1)                                              | 99<br>O10Th5.q0.m1-201<br>6.38 eV (C1)                                              | 100<br>O10Th5.q0.m1-120<br>6.41 eV (CS)                                             | 101<br>O10Th5.q0.m1-202<br>6.41 eV (C1)                                               | 102<br>O10Th5.q0.m1-179<br>6.38 eV (C1)                                               |
|  |  |  |  |  |  |
| 103<br>O10Th5.q0.m1-81<br>6.40 eV (C1)                                              | 104<br>O10Th5.q0.m1-182<br>6.38 eV (CS)                                             | 105<br>O10Th5.q0.m1-133<br>6.43 eV (C1)                                             | 106<br>O10Th5.q0.m1-104<br>6.43 eV (C1)                                             | 107<br>O10Th5.q0.m1-181<br>6.44 eV (C1)                                               | 108<br>O10Th5.q0.m1-116<br>6.46 eV (C1)                                               |

| $\text{Th}_5\text{O}_{10}$ (Continued from previous page)                                                                      |                                                                                                                                |                                                                                                                                |                                                                                                                                |                                                                                                                                 |                                                                                                                                  |
|--------------------------------------------------------------------------------------------------------------------------------|--------------------------------------------------------------------------------------------------------------------------------|--------------------------------------------------------------------------------------------------------------------------------|--------------------------------------------------------------------------------------------------------------------------------|---------------------------------------------------------------------------------------------------------------------------------|----------------------------------------------------------------------------------------------------------------------------------|
| 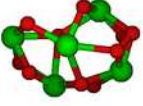<br>109<br>O10Th5.q0.m1-40<br>6.50 eV (C1)    | <br>110<br>O10Th5.q0.m1-111<br>6.45 eV (C1)   | <br>111<br>O10Th5.q0.m1-69<br>6.50 eV (C1)    | <br>112<br>O10Th5.q0.m1-148<br>6.49 eV (C1)   | <br>113<br>O10Th5.q0.m1-164<br>6.48 eV (CS)  | <br>114<br>O10Th5.q0.m1-262<br>6.52 eV (CS)   |
| <br>115<br>O10Th5.q0.m1-100<br>6.52 eV (C1)   | <br>116<br>O10Th5.q0.m1-102<br>6.52 eV (C1)   | <br>117<br>O10Th5.q0.m1-173<br>6.55 eV (C1)   | <br>118<br>O10Th5.q0.m1-221<br>6.56 eV (C1)   | <br>119<br>O10Th5.q0.m1-29<br>6.60 eV (C1)   | <br>120<br>O10Th5.q0.m1-33<br>6.63 eV (C1)    |
| <br>121<br>O10Th5.q0.m1-106<br>6.65 eV (C1)   | <br>122<br>O10Th5.q0.m1-261<br>6.68 eV (C1)   | <br>123<br>O10Th5.q0.m1-43<br>6.67 eV (C1)    | <br>124<br>O10Th5.q0.m1-198<br>6.68 eV (C1)   | <br>125<br>O10Th5.q0.m1-16<br>6.68 eV (C1)   | <br>126<br>O10Th5.q0.m1-134<br>6.68 eV (C1)   |
| <br>127<br>O10Th5.q0.m1-229<br>6.73 eV (C1) | <br>128<br>O10Th5.q0.m1-137<br>6.73 eV (C1) | <br>129<br>O10Th5.q0.m1-227<br>6.74 eV (C1) | <br>130<br>O10Th5.q0.m1-76<br>6.76 eV (C1)  | <br>131<br>O10Th5.q0.m1-26<br>6.74 eV (C1) | <br>132<br>O10Th5.q0.m1-35<br>6.75 eV (CS)  |
| <br>133<br>O10Th5.q0.m1-5<br>6.76 eV (C1)   | <br>134<br>O10Th5.q0.m1-190<br>6.80 eV (C1) | <br>135<br>O10Th5.q0.m1-87<br>6.82 eV (C1)  | <br>136<br>O10Th5.q0.m1-36<br>6.88 eV (C1)  | <br>137<br>O10Th5.q0.m1-89<br>6.91 eV (C1) | <br>138<br>O10Th5.q0.m1-162<br>6.91 eV (C1) |
| <br>139<br>O10Th5.q0.m1-28<br>6.95 eV (C1)  | <br>140<br>O10Th5.q0.m1-244<br>6.96 eV (C1) | <br>141<br>O10Th5.q0.m1-220<br>6.99 eV (C1) | <br>142<br>O10Th5.q0.m1-142<br>6.99 eV (C1) | <br>143<br>O10Th5.q0.m1-30<br>7.01 eV (CS) | <br>144<br>O10Th5.q0.m1-236<br>7.00 eV (C1) |

| Th <sub>5</sub> O <sub>10</sub> (Continued from previous page)                      |                                                                                     |                                                                                     |                                                                                     |                                                                                       |                                                                                       |
|-------------------------------------------------------------------------------------|-------------------------------------------------------------------------------------|-------------------------------------------------------------------------------------|-------------------------------------------------------------------------------------|---------------------------------------------------------------------------------------|---------------------------------------------------------------------------------------|
| 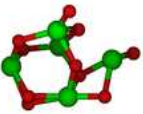   |    |    |    |    |    |
| 145<br>O10Th5.q0.m1-53<br>7.00 eV (C1)                                              | 146<br>O10Th5.q0.m1-213<br>7.04 eV (C1)                                             | 147<br>O10Th5.q0.m1-67<br>7.04 eV (C1)                                              | 148<br>O10Th5.q0.m1-21<br>7.04 eV (C1)                                              | 149<br>O10Th5.q0.m1-197<br>7.03 eV (C1)                                               | 150<br>O10Th5.q0.m1-125<br>7.05 eV (C1)                                               |
|    |    |    |    |    |    |
| 151<br>O10Th5.q0.m1-183<br>7.08 eV (C1)                                             | 152<br>O10Th5.q0.m1-12<br>7.11 eV (C1)                                              | 153<br>O10Th5.q0.m1-112<br>7.13 eV (C1)                                             | 154<br>O10Th5.q0.m1-193<br>7.23 eV (C1)                                             | 155<br>O10Th5.q0.m1-129<br>7.24 eV (C1)                                               | 156<br>O10Th5.q0.m1-90<br>7.24 eV (C1)                                                |
|    |    |    |    |    |    |
| 157<br>O10Th5.q0.m1-24<br>7.25 eV (C1)                                              | 158<br>O10Th5.q0.m1-65<br>7.26 eV (C1)                                              | 159<br>O10Th5.q0.m1-269<br>7.28 eV (C1)                                             | 160<br>O10Th5.q0.m1-245<br>7.27 eV (C1)                                             | 161<br>O10Th5.q0.m1-49<br>7.30 eV (C1)                                                | 162<br>O10Th5.q0.m1-248<br>7.35 eV (C1)                                               |
|  |  |  |  |  |  |
| 163<br>O10Th5.q0.m1-159<br>7.45 eV (C1)                                             | 164<br>O10Th5.q0.m1-228<br>7.45 eV (C1)                                             | 165<br>O10Th5.q0.m1-266<br>7.45 eV (C1)                                             | 166<br>O10Th5.q0.m1-19<br>7.46 eV (C1)                                              | 167<br>O10Th5.q0.m1-103<br>7.43 eV (C1)                                               | 168<br>O10Th5.q0.m1-175<br>7.53 eV (C1)                                               |
|  |  |  |  |  |  |
| 169<br>O10Th5.q0.m1-96<br>7.52 eV (C1)                                              | 170<br>O10Th5.q0.m1-219<br>7.52 eV (C1)                                             | 171<br>O10Th5.q0.m1-203<br>7.50 eV (C1)                                             | 172<br>O10Th5.q0.m1-48<br>7.59 eV (C1)                                              | 173<br>O10Th5.q0.m1-195<br>7.58 eV (C1)                                               | 174<br>O10Th5.q0.m1-204<br>7.58 eV (C1)                                               |
|  |  |  |  |  |  |
| 175<br>O10Th5.q0.m1-254<br>7.60 eV (C1)                                             | 176<br>O10Th5.q0.m1-258<br>7.64 eV (C1)                                             | 177<br>O10Th5.q0.m1-83<br>7.67 eV (C1)                                              | 178<br>O10Th5.q0.m1-217<br>7.67 eV (C1)                                             | 179<br>O10Th5.q0.m1-80<br>7.67 eV (C1)                                                | 180<br>O10Th5.q0.m1-206<br>7.69 eV (C1)                                               |

| Th <sub>5</sub> O <sub>10</sub> (Continued from previous page)                      |                                                                                     |                                                                                     |                                                                                     |                                                                                       |                                                                                       |
|-------------------------------------------------------------------------------------|-------------------------------------------------------------------------------------|-------------------------------------------------------------------------------------|-------------------------------------------------------------------------------------|---------------------------------------------------------------------------------------|---------------------------------------------------------------------------------------|
| 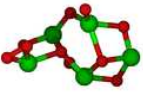   |    |    |    |    |    |
| 181<br>O10Th5.q0.m1-259<br>7.70 eV (C1)                                             | 182<br>O10Th5.q0.m1-172<br>7.72 eV (C1)                                             | 183<br>O10Th5.q0.m1-247<br>7.73 eV (C1)                                             | 184<br>O10Th5.q0.m1-212<br>7.73 eV (C1)                                             | 185<br>O10Th5.q0.m1-144<br>7.83 eV (C1)                                               | 186<br>O10Th5.q0.m1-264<br>7.81 eV (C1)                                               |
|    |    |    |    |    |    |
| 187<br>O10Th5.q0.m1-105<br>7.86 eV (C1)                                             | 188<br>O10Th5.q0.m1-238<br>7.90 eV (C1)                                             | 189<br>O10Th5.q0.m1-64<br>7.90 eV (C1)                                              | 190<br>O10Th5.q0.m1-257<br>7.89 eV (C1)                                             | 191<br>O10Th5.q0.m1-160<br>7.94 eV (C1)                                               | 192<br>O10Th5.q0.m1-209<br>7.95 eV (C1)                                               |
|    |    |    |    |    |    |
| 193<br>O10Th5.q0.m1-11<br>7.99 eV (C1)                                              | 194<br>O10Th5.q0.m1-215<br>8.03 eV (C1)                                             | 195<br>O10Th5.q0.m1-97<br>8.04 eV (C1)                                              | 196<br>O10Th5.q0.m1-260<br>8.07 eV (C1)                                             | 197<br>O10Th5.q0.m1-39<br>8.11 eV (C1)                                                | 198<br>O10Th5.q0.m1-86<br>8.14 eV (C1)                                                |
|  |  |  |  |  |  |
| 199<br>O10Th5.q0.m1-18<br>8.16 eV (C1)                                              | 200<br>O10Th5.q0.m1-157<br>8.18 eV (C1)                                             | 201<br>O10Th5.q0.m1-7<br>8.20 eV (C1)                                               | 202<br>O10Th5.q0.m1-263<br>8.20 eV (C1)                                             | 203<br>O10Th5.q0.m1-2<br>8.22 eV (C1)                                                 | 204<br>O10Th5.q0.m1-222<br>8.21 eV (C1)                                               |
|  |  |  |  |  |  |
| 205<br>O10Th5.q0.m1-191<br>8.25 eV (C1)                                             | 206<br>O10Th5.q0.m1-143<br>8.36 eV (C1)                                             | 207<br>O10Th5.q0.m1-10<br>8.39 eV (C1)                                              | 208<br>O10Th5.q0.m1-77<br>8.47 eV (C1)                                              | 209<br>O10Th5.q0.m1-38<br>8.54 eV (C1)                                                | 210<br>O10Th5.q0.m1-150<br>8.60 eV (C1)                                               |
|  |  |  |  |  |  |
| 211<br>O10Th5.q0.m1-253<br>8.66 eV (C1)                                             | 212<br>O10Th5.q0.m1-54<br>8.73 eV (C1)                                              | 213<br>O10Th5.q0.m1-196<br>8.75 eV (C1)                                             | 214<br>O10Th5.q0.m1-50<br>8.89 eV (C1)                                              | 215<br>O10Th5.q0.m1-73<br>9.12 eV (C1)                                                | 216<br>O10Th5.q0.m1-252<br>9.28 eV (C1)                                               |

| Th <sub>5</sub> O <sub>10</sub> (Continued from previous page)                      |                                                                                     |                                                                                     |                                                                                     |                                                                                       |                                                                                       |
|-------------------------------------------------------------------------------------|-------------------------------------------------------------------------------------|-------------------------------------------------------------------------------------|-------------------------------------------------------------------------------------|---------------------------------------------------------------------------------------|---------------------------------------------------------------------------------------|
| 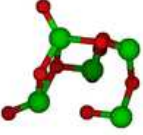   |    |    |    |    |    |
| 217<br>O10Th5.q0.m1-243<br>9.29 eV (C1)                                             | 218<br>O10Th5.q0.m1-189<br>9.55 eV (C1)                                             | 219<br>O10Th5.q0.m1-101<br>9.55 eV (C1)                                             | 220<br>O10Th5.q0.m1-158<br>9.72 eV (C1)                                             | 221<br>O10Th5.q0.m1-114<br>9.85 eV (C1)                                               | 222<br>O10Th5.q0.m1-240<br>9.92 eV (C1)                                               |
|    |    |    |    |    |    |
| 223<br>O10Th5.q0.m1-75<br>10.49 eV (C1)                                             | 224<br>O10Th5.q0.m1-239<br>11.26 eV (C1)                                            | 225<br>O10Th5.q0.m1-88<br>11.41 eV (C1)                                             | 226<br>O10Th5.q0.m1-267<br>11.56 eV (C1)                                            | 227<br>O10Th5.q0.m1-84<br>11.83 eV (C1)                                               | 228<br>O10Th5.q0.m1-192<br>12.00 eV (C1)                                              |
|    |    |    |    |    |    |
| 229<br>O10Th5.q0.m1-154<br>12.19 eV (C1)                                            | 230<br>O10Th5.q0.m1-156<br>12.28 eV (C1)                                            | 231<br>O10Th5.q0.m1-127<br>12.40 eV (C1)                                            | 232<br>O10Th5.q0.m1-6<br>12.50 eV (C1)                                              | 233<br>O10Th5.q0.m1-107<br>12.51 eV (C1)                                              | 234<br>O10Th5.q0.m1-184<br>12.56 eV (C1)                                              |
|  |  |  |  |  |  |
| 235<br>O10Th5.q0.m1-194<br>12.64 eV (C1)                                            | 236<br>O10Th5.q0.m1-230<br>13.01 eV (C1)                                            | 237<br>O10Th5.q0.m1-207<br>13.22 eV (C1)                                            | 238<br>O10Th5.q0.m1-9<br>13.44 eV (C1)                                              | 239<br>O10Th5.q0.m1-3<br>13.53 eV (C1)                                                | 240<br>O10Th5.q0.m1-8<br>13.56 eV (C1)                                                |
|  |  |  |  |  |  |
| 241<br>O10Th5.q0.m1-170<br>13.66 eV (C1)                                            | 242<br>O10Th5.q0.m1-174<br>13.97 eV (C1)                                            | 243<br>O10Th5.q0.m1-208<br>13.97 eV (C1)                                            | 244<br>O10Th5.q0.m1-177<br>13.99 eV (C1)                                            | 245<br>O10Th5.q0.m1-46<br>14.03 eV (C1)                                               | 246<br>O10Th5.q0.m1-23<br>14.02 eV (C1)                                               |
|  |  |  |  |  |  |
| 247<br>O10Th5.q0.m1-15<br>14.32 eV (C1)                                             | 248<br>O10Th5.q0.m1-205<br>14.42 eV (C1)                                            | 249<br>O10Th5.q0.m1-94<br>14.54 eV (C1)                                             | 250<br>O10Th5.q0.m1-165<br>14.56 eV (C1)                                            | 251<br>O10Th5.q0.m1-226<br>14.76 eV (C1)                                              | 252<br>O10Th5.q0.m1-22<br>15.05 eV (C1)                                               |

| $\text{Th}_6\text{O}_{12}$                                                                                                     |                                                                                                                                |                                                                                                                                |                                                                                                                                |                                                                                                                                  |                                                                                                                                  |
|--------------------------------------------------------------------------------------------------------------------------------|--------------------------------------------------------------------------------------------------------------------------------|--------------------------------------------------------------------------------------------------------------------------------|--------------------------------------------------------------------------------------------------------------------------------|----------------------------------------------------------------------------------------------------------------------------------|----------------------------------------------------------------------------------------------------------------------------------|
| 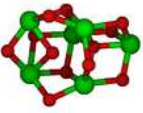<br>1<br>O12Th6.q0.m1-152<br>0.00 eV (CS)     | <br>2<br>O12Th6.q0.m1-21<br>0.30 eV (C1)      | <br>3<br>O12Th6.q0.m1-1106<br>0.30 eV (C1)    | <br>4<br>O12Th6.q0.m1-115<br>0.37 eV (CS)     | <br>5<br>O12Th6.q0.m1-164<br>0.48 eV (C1)     | <br>6<br>O12Th6.q0.m1-134<br>0.57 eV (C1)     |
| <br>7<br>O12Th6.q0.m1-319<br>0.57 eV (C1)     | <br>8<br>O12Th6.q0.m1-108<br>0.67 eV (C1)     | <br>9<br>O12Th6.q0.m1-559<br>0.67 eV (C1)     | <br>10<br>O12Th6.q0.m1-1127<br>0.68 eV (C1)   | <br>11<br>O12Th6.q0.m1-109<br>0.72 eV (C1)    | <br>12<br>O12Th6.q0.m1-316<br>0.73 eV (C1)    |
| <br>13<br>O12Th6.q0.m1-136<br>0.78 eV (CS)    | <br>14<br>O12Th6.q0.m1-1101<br>0.83 eV (C1)   | <br>15<br>O12Th6.q0.m1-11<br>0.91 eV (C1)     | <br>16<br>O12Th6.q0.m1-143<br>0.89 eV (CS)    | <br>17<br>O12Th6.q0.m1-127<br>0.93 eV (C2)    | <br>18<br>O12Th6.q0.m1-1176<br>0.93 eV (C2)   |
| <br>19<br>O12Th6.q0.m1-503<br>0.93 eV (C1)  | <br>20<br>O12Th6.q0.m1-1062<br>1.01 eV (C1) | <br>21<br>O12Th6.q0.m1-1023<br>1.05 eV (CS) | <br>22<br>O12Th6.q0.m1-1098<br>1.03 eV (C1) | <br>23<br>O12Th6.q0.m1-768<br>1.06 eV (C1)  | <br>24<br>O12Th6.q0.m1-1077<br>1.07 eV (C1) |
| <br>25<br>O12Th6.q0.m1-226<br>1.10 eV (CS)  | <br>26<br>O12Th6.q0.m1-16<br>1.08 eV (C1)   | <br>27<br>O12Th6.q0.m1-124<br>1.11 eV (CS)  | <br>28<br>O12Th6.q0.m1-147<br>1.11 eV (C1)  | <br>29<br>O12Th6.q0.m1-385<br>1.16 eV (C1)  | <br>30<br>O12Th6.q0.m1-650<br>1.16 eV (CS)  |
| <br>31<br>O12Th6.q0.m1-1107<br>1.15 eV (C1) | <br>32<br>O12Th6.q0.m1-998<br>1.17 eV (C1)  | <br>33<br>O12Th6.q0.m1-1036<br>1.15 eV (C1) | <br>34<br>O12Th6.q0.m1-1013<br>1.20 eV (C1) | <br>35<br>O12Th6.q0.m1-1032<br>1.20 eV (C1) | <br>36<br>O12Th6.q0.m1-1033<br>1.17 eV (C1) |

| $\text{Th}_6\text{O}_{12}$ (Continued from previous page)                                                                      |                                                                                                                                |                                                                                                                               |                                                                                                                                |                                                                                                                                 |                                                                                                                                  |
|--------------------------------------------------------------------------------------------------------------------------------|--------------------------------------------------------------------------------------------------------------------------------|-------------------------------------------------------------------------------------------------------------------------------|--------------------------------------------------------------------------------------------------------------------------------|---------------------------------------------------------------------------------------------------------------------------------|----------------------------------------------------------------------------------------------------------------------------------|
| 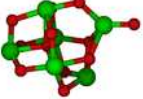<br>37<br>O12Th6.q0.m1-201<br>1.17 eV (CS)    | <br>38<br>O12Th6.q0.m1-555<br>1.22 eV (C1)    | <br>39<br>O12Th6.q0.m1-296<br>1.22 eV (C1)   | <br>40<br>O12Th6.q0.m1-110<br>1.22 eV (C1)    | <br>41<br>O12Th6.q0.m1-322<br>1.26 eV (C1)   | <br>42<br>O12Th6.q0.m1-170<br>1.23 eV (C1)    |
| <br>43<br>O12Th6.q0.m1-452<br>1.26 eV (C1)    | <br>44<br>O12Th6.q0.m1-42<br>1.27 eV (C1)     | <br>45<br>O12Th6.q0.m1-158<br>1.28 eV (C1)   | <br>46<br>O12Th6.q0.m1-1250<br>1.28 eV (C1)   | <br>47<br>O12Th6.q0.m1-1162<br>1.28 eV (CS)  | <br>48<br>O12Th6.q0.m1-1129<br>1.30 eV (C1)   |
| <br>49<br>O12Th6.q0.m1-890<br>1.32 eV (C1)    | <br>50<br>O12Th6.q0.m1-327<br>1.33 eV (C1)    | <br>51<br>O12Th6.q0.m1-211<br>1.31 eV (C1)   | <br>52<br>O12Th6.q0.m1-722<br>1.30 eV (C1)    | <br>53<br>O12Th6.q0.m1-268<br>1.34 eV (C1)   | <br>54<br>O12Th6.q0.m1-829<br>1.35 eV (C1)    |
| <br>55<br>O12Th6.q0.m1-314<br>1.32 eV (C1)  | <br>56<br>O12Th6.q0.m1-401<br>1.35 eV (C1)  | <br>57<br>O12Th6.q0.m1-816<br>1.38 eV (CS) | <br>58<br>O12Th6.q0.m1-360<br>1.36 eV (CS)  | <br>59<br>O12Th6.q0.m1-755<br>1.39 eV (C1) | <br>60<br>O12Th6.q0.m1-1140<br>1.38 eV (C1) |
| <br>61<br>O12Th6.q0.m1-1094<br>1.42 eV (C1) | <br>62<br>O12Th6.q0.m1-233<br>1.40 eV (C1)  | <br>63<br>O12Th6.q0.m1-424<br>1.40 eV (C1) | <br>64<br>O12Th6.q0.m1-397<br>1.41 eV (C1)  | <br>65<br>O12Th6.q0.m1-101<br>1.46 eV (C1) | <br>66<br>O12Th6.q0.m1-54<br>1.46 eV (C1)   |
| <br>67<br>O12Th6.q0.m1-571<br>1.47 eV (C1)  | <br>68<br>O12Th6.q0.m1-1042<br>1.49 eV (C1) | <br>69<br>O12Th6.q0.m1-303<br>1.50 eV (C1) | <br>70<br>O12Th6.q0.m1-1003<br>1.50 eV (C1) | <br>71<br>O12Th6.q0.m1-242<br>1.49 eV (C1) | <br>72<br>O12Th6.q0.m1-132<br>1.50 eV (C1)  |

| $\text{Th}_6\text{O}_{12}$ (Continued from previous page)                           |                                                                                     |                                                                                     |                                                                                     |                                                                                       |                                                                                       |
|-------------------------------------------------------------------------------------|-------------------------------------------------------------------------------------|-------------------------------------------------------------------------------------|-------------------------------------------------------------------------------------|---------------------------------------------------------------------------------------|---------------------------------------------------------------------------------------|
| 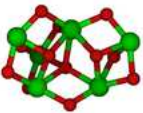   |    |    |    |    |    |
| 73<br>O12Th6.q0.m1-473<br>1.53 eV (C1)                                              | 74<br>O12Th6.q0.m1-554<br>1.54 eV (C1)                                              | 75<br>O12Th6.q0.m1-95<br>1.51 eV (C1)                                               | 76<br>O12Th6.q0.m1-345<br>1.52 eV (C1)                                              | 77<br>O12Th6.q0.m1-941<br>1.56 eV (C1)                                                | 78<br>O12Th6.q0.m1-377<br>1.56 eV (C1)                                                |
|    |    |    |    |    |    |
| 79<br>O12Th6.q0.m1-1028<br>1.56 eV (C1)                                             | 80<br>O12Th6.q0.m1-225<br>1.56 eV (C1)                                              | 81<br>O12Th6.q0.m1-1181<br>1.57 eV (C1)                                             | 82<br>O12Th6.q0.m1-944<br>1.57 eV (C1)                                              | 83<br>O12Th6.q0.m1-652<br>1.57 eV (C1)                                                | 84<br>O12Th6.q0.m1-33<br>1.59 eV (C1)                                                 |
|    |    |    |    |    |    |
| 85<br>O12Th6.q0.m1-176<br>1.59 eV (C1)                                              | 86<br>O12Th6.q0.m1-118<br>1.60 eV (C1)                                              | 87<br>O12Th6.q0.m1-774<br>1.59 eV (C1)                                              | 88<br>O12Th6.q0.m1-1016<br>1.62 eV (C1)                                             | 89<br>O12Th6.q0.m1-102<br>1.63 eV (C1)                                                | 90<br>O12Th6.q0.m1-104<br>1.63 eV (C1)                                                |
|  |  |  |  |  |  |
| 91<br>O12Th6.q0.m1-151<br>1.64 eV (C1)                                              | 92<br>O12Th6.q0.m1-1030<br>1.64 eV (C1)                                             | 93<br>O12Th6.q0.m1-209<br>1.60 eV (C1)                                              | 94<br>O12Th6.q0.m1-323<br>1.64 eV (C1)                                              | 95<br>O12Th6.q0.m1-1096<br>1.67 eV (C1)                                               | 96<br>O12Th6.q0.m1-948<br>1.67 eV (C1)                                                |
|  |  |  |  |  |  |
| 97<br>O12Th6.q0.m1-1135<br>1.67 eV (C1)                                             | 98<br>O12Th6.q0.m1-782<br>1.68 eV (C1)                                              | 99<br>O12Th6.q0.m1-733<br>1.71 eV (C1)                                              | 100<br>O12Th6.q0.m1-723<br>1.70 eV (C1)                                             | 101<br>O12Th6.q0.m1-1177<br>1.71 eV (C1)                                              | 102<br>O12Th6.q0.m1-906<br>1.68 eV (C1)                                               |
|  |  |  |  |  |  |
| 103<br>O12Th6.q0.m1-645<br>1.70 eV (C1)                                             | 104<br>O12Th6.q0.m1-701<br>1.80 eV (C1)                                             | 105<br>O12Th6.q0.m1-122<br>1.77 eV (C1)                                             | 106<br>O12Th6.q0.m1-51<br>1.77 eV (C1)                                              | 107<br>O12Th6.q0.m1-1007<br>1.78 eV (C1)                                              | 108<br>O12Th6.q0.m1-135<br>1.79 eV (C1)                                               |

| Th <sub>6</sub> O <sub>12</sub> (Continued from previous page)                                                                  |                                                                                                                                |                                                                                                                                |                                                                                                                                 |                                                                                                                                  |                                                                                                                                   |
|---------------------------------------------------------------------------------------------------------------------------------|--------------------------------------------------------------------------------------------------------------------------------|--------------------------------------------------------------------------------------------------------------------------------|---------------------------------------------------------------------------------------------------------------------------------|----------------------------------------------------------------------------------------------------------------------------------|-----------------------------------------------------------------------------------------------------------------------------------|
| 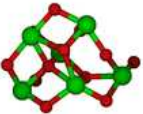<br>109<br>O12Th6.q0.m1-1074<br>1.78 eV (C1)   | <br>110<br>O12Th6.q0.m1-347<br>1.78 eV (C1)   | <br>111<br>O12Th6.q0.m1-549<br>1.78 eV (C1)   | <br>112<br>O12Th6.q0.m1-359<br>1.81 eV (C1)    | <br>113<br>O12Th6.q0.m1-1053<br>1.81 eV (C1)  | <br>114<br>O12Th6.q0.m1-1128<br>1.84 eV (C1)   |
| <br>115<br>O12Th6.q0.m1-1208<br>1.86 eV (C2V)  | <br>116<br>O12Th6.q0.m1-845<br>1.86 eV (C1)   | <br>117<br>O12Th6.q0.m1-1064<br>1.91 eV (C1)  | <br>118<br>O12Th6.q0.m1-740<br>1.90 eV (C1)    | <br>119<br>O12Th6.q0.m1-146<br>1.92 eV (C1)   | <br>120<br>O12Th6.q0.m1-603<br>1.92 eV (C1)    |
| <br>121<br>O12Th6.q0.m1-1113<br>1.92 eV (C1)   | <br>122<br>O12Th6.q0.m1-1004<br>1.92 eV (C1)  | <br>123<br>O12Th6.q0.m1-678<br>1.92 eV (C1)   | <br>124<br>O12Th6.q0.m1-276<br>1.93 eV (CS)    | <br>125<br>O12Th6.q0.m1-1136<br>1.90 eV (C1)  | <br>126<br>O12Th6.q0.m1-1045<br>1.92 eV (C1)   |
| <br>127<br>O12Th6.q0.m1-556<br>1.97 eV (C1)  | <br>128<br>O12Th6.q0.m1-416<br>1.95 eV (C1) | <br>129<br>O12Th6.q0.m1-628<br>1.94 eV (C1) | <br>130<br>O12Th6.q0.m1-1084<br>1.95 eV (C1) | <br>131<br>O12Th6.q0.m1-542<br>1.95 eV (C1) | <br>132<br>O12Th6.q0.m1-1031<br>1.97 eV (C1) |
| <br>133<br>O12Th6.q0.m1-149<br>1.96 eV (C1)  | <br>134<br>O12Th6.q0.m1-488<br>1.96 eV (C1) | <br>135<br>O12Th6.q0.m1-175<br>1.98 eV (CS) | <br>136<br>O12Th6.q0.m1-141<br>2.00 eV (C1)  | <br>137<br>O12Th6.q0.m1-429<br>1.96 eV (C2) | <br>138<br>O12Th6.q0.m1-472<br>2.01 eV (C1)  |
| <br>139<br>O12Th6.q0.m1-1258<br>2.01 eV (CS) | <br>140<br>O12Th6.q0.m1-481<br>2.00 eV (C1) | <br>141<br>O12Th6.q0.m1-905<br>2.00 eV (C1) | <br>142<br>O12Th6.q0.m1-677<br>2.05 eV (C1)  | <br>143<br>O12Th6.q0.m1-731<br>2.03 eV (C1) | <br>144<br>O12Th6.q0.m1-736<br>2.03 eV (C1)  |

| $\text{Th}_6\text{O}_{12}$ (Continued from previous page)                                                                       |                                                                                                                                 |                                                                                                                                 |                                                                                                                                 |                                                                                                                                  |                                                                                                                                   |
|---------------------------------------------------------------------------------------------------------------------------------|---------------------------------------------------------------------------------------------------------------------------------|---------------------------------------------------------------------------------------------------------------------------------|---------------------------------------------------------------------------------------------------------------------------------|----------------------------------------------------------------------------------------------------------------------------------|-----------------------------------------------------------------------------------------------------------------------------------|
| 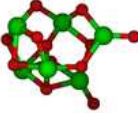<br>145<br>O12Th6.q0.m1-980<br>2.04 eV (C1)    | <br>146<br>O12Th6.q0.m1-739<br>2.05 eV (C1)    | <br>147<br>O12Th6.q0.m1-190<br>2.07 eV (C1)    | <br>148<br>O12Th6.q0.m1-1161<br>2.05 eV (C1)   | <br>149<br>O12Th6.q0.m1-1079<br>2.08 eV (C1)  | <br>150<br>O12Th6.q0.m1-205<br>2.07 eV (C1)    |
| <br>151<br>O12Th6.q0.m1-529<br>2.08 eV (C1)    | <br>152<br>O12Th6.q0.m1-120<br>2.09 eV (C1)    | <br>153<br>O12Th6.q0.m1-1078<br>2.09 eV (C1)   | <br>154<br>O12Th6.q0.m1-304<br>2.09 eV (C1)    | <br>155<br>O12Th6.q0.m1-1175<br>2.11 eV (C1)  | <br>156<br>O12Th6.q0.m1-126<br>2.10 eV (C1)    |
| <br>157<br>O12Th6.q0.m1-578<br>2.10 eV (C1)    | <br>158<br>O12Th6.q0.m1-133<br>2.10 eV (C1)    | <br>159<br>O12Th6.q0.m1-139<br>2.09 eV (C1)    | <br>160<br>O12Th6.q0.m1-1025<br>2.11 eV (C1)   | <br>161<br>O12Th6.q0.m1-1218<br>2.09 eV (C1)  | <br>162<br>O12Th6.q0.m1-140<br>2.10 eV (C1)    |
| <br>163<br>O12Th6.q0.m1-1081<br>2.11 eV (C1) | <br>164<br>O12Th6.q0.m1-1065<br>2.13 eV (C1) | <br>165<br>O12Th6.q0.m1-1152<br>2.11 eV (C1) | <br>166<br>O12Th6.q0.m1-910<br>2.11 eV (C1)  | <br>167<br>O12Th6.q0.m1-971<br>2.16 eV (C1) | <br>168<br>O12Th6.q0.m1-831<br>2.13 eV (C1)  |
| <br>169<br>O12Th6.q0.m1-5<br>2.16 eV (C1)    | <br>170<br>O12Th6.q0.m1-1134<br>2.13 eV (CS) | <br>171<br>O12Th6.q0.m1-673<br>2.14 eV (C1)  | <br>172<br>O12Th6.q0.m1-1268<br>2.16 eV (C1) | <br>173<br>O12Th6.q0.m1-368<br>2.21 eV (C1) | <br>174<br>O12Th6.q0.m1-1044<br>2.19 eV (C1) |
| <br>175<br>O12Th6.q0.m1-105<br>2.19 eV (C1)  | <br>176<br>O12Th6.q0.m1-315<br>2.20 eV (C1)  | <br>177<br>O12Th6.q0.m1-841<br>2.21 eV (C1)  | <br>178<br>O12Th6.q0.m1-1154<br>2.20 eV (C1) | <br>179<br>O12Th6.q0.m1-536<br>2.18 eV (C1) | <br>180<br>O12Th6.q0.m1-661<br>2.21 eV (CS)  |

| $\text{Th}_6\text{O}_{12}$ (Continued from previous page)                                                                       |                                                                                                                                |                                                                                                                                 |                                                                                                                                 |                                                                                                                                    |                                                                                                                                   |
|---------------------------------------------------------------------------------------------------------------------------------|--------------------------------------------------------------------------------------------------------------------------------|---------------------------------------------------------------------------------------------------------------------------------|---------------------------------------------------------------------------------------------------------------------------------|------------------------------------------------------------------------------------------------------------------------------------|-----------------------------------------------------------------------------------------------------------------------------------|
| 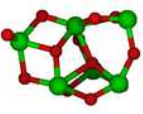<br>181<br>O12Th6.q0.m1-572<br>2.21 eV (C1)    | <br>182<br>O12Th6.q0.m1-776<br>2.23 eV (C1)   | <br>183<br>O12Th6.q0.m1-822<br>2.21 eV (C1)    | <br>184<br>O12Th6.q0.m1-641<br>2.21 eV (C1)    | <br>185<br>O12Th6.q0.m1-1142<br>2.24 eV (C1)    | <br>186<br>O12Th6.q0.m1-577<br>2.25 eV (C1)    |
| <br>187<br>O12Th6.q0.m1-729<br>2.25 eV (C1)    | <br>188<br>O12Th6.q0.m1-26<br>2.25 eV (C1)    | <br>189<br>O12Th6.q0.m1-404<br>2.25 eV (C1)    | <br>190<br>O12Th6.q0.m1-1093<br>2.24 eV (C1)   | <br>191<br>O12Th6.q0.m1-395<br>2.28 eV (C1)     | <br>192<br>O12Th6.q0.m1-247<br>2.25 eV (C1)    |
| <br>193<br>O12Th6.q0.m1-1087<br>2.25 eV (C1)   | <br>194<br>O12Th6.q0.m1-1086<br>2.29 eV (C1)  | <br>195<br>O12Th6.q0.m1-1178<br>2.27 eV (C1)   | <br>196<br>O12Th6.q0.m1-1182<br>2.29 eV (C1)   | <br>197<br>O12Th6.q0.m1-1111<br>2.29 eV (C1)    | <br>198<br>O12Th6.q0.m1-354<br>2.29 eV (C1)    |
| <br>199<br>O12Th6.q0.m1-1038<br>2.28 eV (C1) | <br>200<br>O12Th6.q0.m1-210<br>2.28 eV (C1) | <br>201<br>O12Th6.q0.m1-1261<br>2.29 eV (C1) | <br>202<br>O12Th6.q0.m1-374<br>2.33 eV (C1)  | <br>203<br>O12Th6.q0.m1-489<br>2.32 eV (C1)   | <br>204<br>O12Th6.q0.m1-159<br>2.31 eV (C1)  |
| <br>205<br>O12Th6.q0.m1-326<br>2.31 eV (C1)  | <br>206<br>O12Th6.q0.m1-310<br>2.33 eV (C1) | <br>207<br>O12Th6.q0.m1-3<br>2.32 eV (C1)    | <br>208<br>O12Th6.q0.m1-1150<br>2.33 eV (C1) | <br>209<br>O12Th6.q0.m1-1046<br>2.33 eV (C1)  | <br>210<br>O12Th6.q0.m1-1174<br>2.36 eV (C1) |
| <br>211<br>O12Th6.q0.m1-685<br>2.36 eV (C1)  | <br>212<br>O12Th6.q0.m1-145<br>2.36 eV (C1) | <br>213<br>O12Th6.q0.m1-216<br>2.38 eV (C1)  | <br>214<br>O12Th6.q0.m1-1018<br>2.38 eV (C1) | <br>215<br>O12Th6.q0.m1-1246<br>2.36 eV (D4H) | <br>216<br>O12Th6.q0.m1-1041<br>2.37 eV (C1) |

| Th <sub>6</sub> O <sub>12</sub> (Continued from previous page)                      |                                                                                     |                                                                                     |                                                                                     |                                                                                       |                                                                                       |
|-------------------------------------------------------------------------------------|-------------------------------------------------------------------------------------|-------------------------------------------------------------------------------------|-------------------------------------------------------------------------------------|---------------------------------------------------------------------------------------|---------------------------------------------------------------------------------------|
| 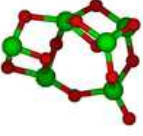   |    |    |    |    |    |
| 217<br>O12Th6.q0.m1-568<br>2.39 eV (C1)                                             | 218<br>O12Th6.q0.m1-358<br>2.39 eV (C1)                                             | 219<br>O12Th6.q0.m1-1057<br>2.39 eV (C1)                                            | 220<br>O12Th6.q0.m1-1040<br>2.39 eV (C1)                                            | 221<br>O12Th6.q0.m1-955<br>2.40 eV (C1)                                               | 222<br>O12Th6.q0.m1-121<br>2.40 eV (C1)                                               |
|    |    |    |    |    |    |
| 223<br>O12Th6.q0.m1-1066<br>2.41 eV (C1)                                            | 224<br>O12Th6.q0.m1-931<br>2.40 eV (C1)                                             | 225<br>O12Th6.q0.m1-334<br>2.40 eV (C1)                                             | 226<br>O12Th6.q0.m1-31<br>2.40 eV (C1)                                              | 227<br>O12Th6.q0.m1-920<br>2.41 eV (CS)                                               | 228<br>O12Th6.q0.m1-1047<br>2.40 eV (C1)                                              |
|    |    |    |    |    |    |
| 229<br>O12Th6.q0.m1-223<br>2.44 eV (C1)                                             | 230<br>O12Th6.q0.m1-1063<br>2.44 eV (C1)                                            | 231<br>O12Th6.q0.m1-320<br>2.42 eV (C1)                                             | 232<br>O12Th6.q0.m1-1116<br>2.45 eV (C1)                                            | 233<br>O12Th6.q0.m1-432<br>2.44 eV (C1)                                               | 234<br>O12Th6.q0.m1-1109<br>2.42 eV (C1)                                              |
|  |  |  |  |  |  |
| 235<br>O12Th6.q0.m1-106<br>2.46 eV (C1)                                             | 236<br>O12Th6.q0.m1-113<br>2.46 eV (C1)                                             | 237<br>O12Th6.q0.m1-1123<br>2.45 eV (C1)                                            | 238<br>O12Th6.q0.m1-1114<br>2.46 eV (C1)                                            | 239<br>O12Th6.q0.m1-1141<br>2.48 eV (C1)                                              | 240<br>O12Th6.q0.m1-643<br>2.47 eV (C1)                                               |
|  |  |  |  |  |  |
| 241<br>O12Th6.q0.m1-103<br>2.49 eV (C1)                                             | 242<br>O12Th6.q0.m1-1099<br>2.49 eV (C1)                                            | 243<br>O12Th6.q0.m1-447<br>2.50 eV (C1)                                             | 244<br>O12Th6.q0.m1-328<br>2.50 eV (C1)                                             | 245<br>O12Th6.q0.m1-40<br>2.50 eV (C1)                                                | 246<br>O12Th6.q0.m1-1061<br>2.51 eV (C1)                                              |
|  |  |  |  |  |  |
| 247<br>O12Th6.q0.m1-770<br>2.52 eV (C1)                                             | 248<br>O12Th6.q0.m1-1005<br>2.51 eV (C1)                                            | 249<br>O12Th6.q0.m1-1103<br>2.52 eV (C1)                                            | 250<br>O12Th6.q0.m1-873<br>2.51 eV (C1)                                             | 251<br>O12Th6.q0.m1-399<br>2.51 eV (C1)                                               | 252<br>O12Th6.q0.m1-1009<br>2.51 eV (C1)                                              |

| Th <sub>6</sub> O <sub>12</sub> (Continued from previous page)                                                                  |                                                                                                                                |                                                                                                                                |                                                                                                                                |                                                                                                                                  |                                                                                                                                   |
|---------------------------------------------------------------------------------------------------------------------------------|--------------------------------------------------------------------------------------------------------------------------------|--------------------------------------------------------------------------------------------------------------------------------|--------------------------------------------------------------------------------------------------------------------------------|----------------------------------------------------------------------------------------------------------------------------------|-----------------------------------------------------------------------------------------------------------------------------------|
| <br>253<br>O12Th6.q0.m1-1170<br>2.54 eV (C1)   | <br>254<br>O12Th6.q0.m1-356<br>2.52 eV (C1)   | <br>255<br>O12Th6.q0.m1-277<br>2.56 eV (C1)   | <br>256<br>O12Th6.q0.m1-1027<br>2.58 eV (C1)  | <br>257<br>O12Th6.q0.m1-107<br>2.56 eV (C1)   | <br>258<br>O12Th6.q0.m1-119<br>2.58 eV (C1)    |
| <br>259<br>O12Th6.q0.m1-1043<br>2.56 eV (C1)   | <br>260<br>O12Th6.q0.m1-1076<br>2.58 eV (C1)  | <br>261<br>O12Th6.q0.m1-791<br>2.56 eV (C1)   | <br>262<br>O12Th6.q0.m1-672<br>2.57 eV (C1)   | <br>263<br>O12Th6.q0.m1-956<br>2.60 eV (C1)   | <br>264<br>O12Th6.q0.m1-292<br>2.58 eV (C1)    |
| <br>265<br>O12Th6.q0.m1-371<br>2.60 eV (C1)    | <br>266<br>O12Th6.q0.m1-1070<br>2.63 eV (C1)  | <br>267<br>O12Th6.q0.m1-14<br>2.59 eV (C1)    | <br>268<br>O12Th6.q0.m1-1068<br>2.63 eV (C1)  | <br>269<br>O12Th6.q0.m1-313<br>2.63 eV (C1)   | <br>270<br>O12Th6.q0.m1-1132<br>2.63 eV (C1)   |
| <br>271<br>O12Th6.q0.m1-1119<br>2.62 eV (C1) | <br>272<br>O12Th6.q0.m1-484<br>2.65 eV (C1) | <br>273<br>O12Th6.q0.m1-12<br>2.63 eV (C1)  | <br>274<br>O12Th6.q0.m1-415<br>2.67 eV (C1) | <br>275<br>O12Th6.q0.m1-306<br>2.69 eV (C1) | <br>276<br>O12Th6.q0.m1-43<br>2.69 eV (C1)   |
| <br>277<br>O12Th6.q0.m1-150<br>2.70 eV (C1)  | <br>278<br>O12Th6.q0.m1-624<br>2.71 eV (C1) | <br>279<br>O12Th6.q0.m1-240<br>2.70 eV (C1) | <br>280<br>O12Th6.q0.m1-218<br>2.71 eV (C1) | <br>281<br>O12Th6.q0.m1-94<br>2.70 eV (C1)  | <br>282<br>O12Th6.q0.m1-1039<br>2.71 eV (C1) |
| <br>283<br>O12Th6.q0.m1-427<br>2.71 eV (C1)  | <br>284<br>O12Th6.q0.m1-420<br>2.70 eV (C1) | <br>285<br>O12Th6.q0.m1-36<br>2.71 eV (C1)  | <br>286<br>O12Th6.q0.m1-486<br>2.72 eV (C1) | <br>287<br>O12Th6.q0.m1-168<br>2.71 eV (C1) | <br>288<br>O12Th6.q0.m1-350<br>2.74 eV (C1)  |

| $\text{Th}_6\text{O}_{12}$ (Continued from previous page)                           |                                                                                     |                                                                                     |                                                                                     |                                                                                       |                                                                                       |
|-------------------------------------------------------------------------------------|-------------------------------------------------------------------------------------|-------------------------------------------------------------------------------------|-------------------------------------------------------------------------------------|---------------------------------------------------------------------------------------|---------------------------------------------------------------------------------------|
| 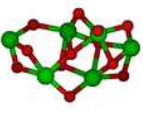   |    |    |    |    |    |
| 289<br>O12Th6.q0.m1-1054<br>2.74 eV (C1)                                            | 290<br>O12Th6.q0.m1-785<br>2.74 eV (C1)                                             | 291<br>O12Th6.q0.m1-25<br>2.75 eV (C1)                                              | 292<br>O12Th6.q0.m1-1017<br>2.75 eV (C1)                                            | 293<br>O12Th6.q0.m1-532<br>2.75 eV (C1)                                               | 294<br>O12Th6.q0.m1-534<br>2.76 eV (C1)                                               |
|    |    |    |    |    |    |
| 295<br>O12Th6.q0.m1-934<br>2.80 eV (C1)                                             | 296<br>O12Th6.q0.m1-174<br>2.80 eV (C1)                                             | 297<br>O12Th6.q0.m1-938<br>2.80 eV (C1)                                             | 298<br>O12Th6.q0.m1-496<br>2.82 eV (C1)                                             | 299<br>O12Th6.q0.m1-1095<br>2.81 eV (C1)                                              | 300<br>O12Th6.q0.m1-1125<br>2.82 eV (C1)                                              |
|    |    |    |    |    |    |
| 301<br>O12Th6.q0.m1-968<br>2.85 eV (C1)                                             | 302<br>O12Th6.q0.m1-1159<br>2.85 eV (C1)                                            | 303<br>O12Th6.q0.m1-1192<br>2.85 eV (C1)                                            | 304<br>O12Th6.q0.m1-530<br>2.83 eV (C1)                                             | 305<br>O12Th6.q0.m1-566<br>2.85 eV (C1)                                               | 306<br>O12Th6.q0.m1-34<br>2.83 eV (C1)                                                |
|  |  |  |  |  |  |
| 307<br>O12Th6.q0.m1-1215<br>2.86 eV (C2V)                                           | 308<br>O12Th6.q0.m1-335<br>2.84 eV (C1)                                             | 309<br>O12Th6.q0.m1-165<br>2.85 eV (C1)                                             | 310<br>O12Th6.q0.m1-1184<br>2.85 eV (C1)                                            | 311<br>O12Th6.q0.m1-777<br>2.84 eV (C1)                                               | 312<br>O12Th6.q0.m1-1165<br>2.85 eV (C1)                                              |
|  |  |  |  |  |  |
| 313<br>O12Th6.q0.m1-977<br>2.86 eV (C1)                                             | 314<br>O12Th6.q0.m1-267<br>2.87 eV (C1)                                             | 315<br>O12Th6.q0.m1-177<br>2.90 eV (C1)                                             | 316<br>O12Th6.q0.m1-535<br>2.90 eV (C1)                                             | 317<br>O12Th6.q0.m1-411<br>2.90 eV (C1)                                               | 318<br>O12Th6.q0.m1-622<br>2.90 eV (C1)                                               |
|  |  |  |  |  |  |
| 319<br>O12Th6.q0.m1-1059<br>2.90 eV (C1)                                            | 320<br>O12Th6.q0.m1-654<br>2.93 eV (C1)                                             | 321<br>O12Th6.q0.m1-219<br>2.94 eV (C1)                                             | 322<br>O12Th6.q0.m1-365<br>2.95 eV (C1)                                             | 323<br>O12Th6.q0.m1-1012<br>2.94 eV (C1)                                              | 324<br>O12Th6.q0.m1-204<br>2.92 eV (C1)                                               |

| $\text{Th}_6\text{O}_{12}$ (Continued from previous page)                                                                       |                                                                                                                                 |                                                                                                                                 |                                                                                                                                 |                                                                                                                                  |                                                                                                                                   |
|---------------------------------------------------------------------------------------------------------------------------------|---------------------------------------------------------------------------------------------------------------------------------|---------------------------------------------------------------------------------------------------------------------------------|---------------------------------------------------------------------------------------------------------------------------------|----------------------------------------------------------------------------------------------------------------------------------|-----------------------------------------------------------------------------------------------------------------------------------|
| 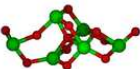<br>325<br>O12Th6.q0.m1-1008<br>2.96 eV (C1)   | <br>326<br>O12Th6.q0.m1-1011<br>2.96 eV (C1)   | <br>327<br>O12Th6.q0.m1-364<br>2.97 eV (C1)    | <br>328<br>O12Th6.q0.m1-821<br>3.00 eV (C1)    | <br>329<br>O12Th6.q0.m1-1130<br>3.02 eV (C1)  | <br>330<br>O12Th6.q0.m1-988<br>3.02 eV (C1)    |
| <br>331<br>O12Th6.q0.m1-819<br>3.03 eV (C1)    | <br>332<br>O12Th6.q0.m1-413<br>3.03 eV (C1)    | <br>333<br>O12Th6.q0.m1-1006<br>3.04 eV (C1)   | <br>334<br>O12Th6.q0.m1-1131<br>3.06 eV (C1)   | <br>335<br>O12Th6.q0.m1-1050<br>3.06 eV (C1)  | <br>336<br>O12Th6.q0.m1-301<br>3.04 eV (C1)    |
| <br>337<br>O12Th6.q0.m1-801<br>3.07 eV (C1)    | <br>338<br>O12Th6.q0.m1-182<br>3.07 eV (C1)    | <br>339<br>O12Th6.q0.m1-1189<br>3.07 eV (C1)   | <br>340<br>O12Th6.q0.m1-1110<br>3.09 eV (C1)   | <br>341<br>O12Th6.q0.m1-1121<br>3.11 eV (C1)  | <br>342<br>O12Th6.q0.m1-789<br>3.16 eV (C1)    |
| <br>343<br>O12Th6.q0.m1-1112<br>3.17 eV (C1) | <br>344<br>O12Th6.q0.m1-1049<br>3.19 eV (C1) | <br>345<br>O12Th6.q0.m1-1051<br>3.20 eV (C1) | <br>346<br>O12Th6.q0.m1-400<br>3.21 eV (C1)  | <br>347<br>O12Th6.q0.m1-752<br>3.24 eV (CS) | <br>348<br>O12Th6.q0.m1-291<br>3.23 eV (C1)  |
| <br>349<br>O12Th6.q0.m1-1048<br>3.23 eV (C1) | <br>350<br>O12Th6.q0.m1-807<br>3.27 eV (C1)  | <br>351<br>O12Th6.q0.m1-565<br>3.28 eV (C1)  | <br>352<br>O12Th6.q0.m1-1029<br>3.29 eV (C1) | <br>353<br>O12Th6.q0.m1-715<br>3.31 eV (C1) | <br>354<br>O12Th6.q0.m1-639<br>3.32 eV (C1)  |
| <br>355<br>O12Th6.q0.m1-487<br>3.31 eV (C1)  | <br>356<br>O12Th6.q0.m1-629<br>3.31 eV (C1)  | <br>357<br>O12Th6.q0.m1-1000<br>3.33 eV (C1) | <br>358<br>O12Th6.q0.m1-1148<br>3.33 eV (C1) | <br>359<br>O12Th6.q0.m1-272<br>3.37 eV (C1) | <br>360<br>O12Th6.q0.m1-1058<br>3.37 eV (C1) |

| $\text{Th}_6\text{O}_{12}$ (Continued from previous page)                                                                       |                                                                                                                                 |                                                                                                                                 |                                                                                                                                 |                                                                                                                                   |                                                                                                                                   |
|---------------------------------------------------------------------------------------------------------------------------------|---------------------------------------------------------------------------------------------------------------------------------|---------------------------------------------------------------------------------------------------------------------------------|---------------------------------------------------------------------------------------------------------------------------------|-----------------------------------------------------------------------------------------------------------------------------------|-----------------------------------------------------------------------------------------------------------------------------------|
| 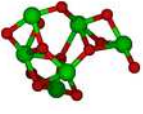<br>361<br>O12Th6.q0.m1-376<br>3.41 eV (C1)    | <br>362<br>O12Th6.q0.m1-1137<br>3.38 eV (C1)   | <br>363<br>O12Th6.q0.m1-228<br>3.39 eV (C1)    | <br>364<br>O12Th6.q0.m1-1158<br>3.42 eV (C1)   | <br>365<br>O12Th6.q0.m1-269<br>3.42 eV (C1)    | <br>366<br>O12Th6.q0.m1-1052<br>3.46 eV (C1)   |
| <br>367<br>O12Th6.q0.m1-329<br>3.46 eV (C1)    | <br>368<br>O12Th6.q0.m1-74<br>3.67 eV (C1)     | <br>369<br>O12Th6.q0.m1-889<br>3.79 eV (C1)    | <br>370<br>O12Th6.q0.m1-893<br>4.41 eV (CS)    | <br>371<br>O12Th6.q0.m1-561<br>5.87 eV (C1)    | <br>372<br>O12Th6.q0.m1-1255<br>5.87 eV (C1)   |
| <br>373<br>O12Th6.q0.m1-1118<br>5.93 eV (C1)   | <br>374<br>O12Th6.q0.m1-1219<br>6.00 eV (C2)   | <br>375<br>O12Th6.q0.m1-865<br>6.03 eV (C1)    | <br>376<br>O12Th6.q0.m1-1221<br>6.00 eV (C1)   | <br>377<br>O12Th6.q0.m1-1236<br>6.01 eV (C1)   | <br>378<br>O12Th6.q0.m1-337<br>6.18 eV (C1)    |
| <br>379<br>O12Th6.q0.m1-1222<br>6.18 eV (C1) | <br>380<br>O12Th6.q0.m1-634<br>6.21 eV (C1)  | <br>381<br>O12Th6.q0.m1-1035<br>6.32 eV (C1) | <br>382<br>O12Th6.q0.m1-1211<br>6.35 eV (C1) | <br>383<br>O12Th6.q0.m1-1197<br>6.40 eV (C1) | <br>384<br>O12Th6.q0.m1-990<br>6.48 eV (C1)  |
| <br>385<br>O12Th6.q0.m1-899<br>6.53 eV (C1)  | <br>386<br>O12Th6.q0.m1-1252<br>6.52 eV (C1) | <br>387<br>O12Th6.q0.m1-263<br>6.81 eV (C1)  | <br>388<br>O12Th6.q0.m1-1225<br>6.83 eV (C1) | <br>389<br>O12Th6.q0.m1-1191<br>6.86 eV (C1) | <br>390<br>O12Th6.q0.m1-1265<br>6.89 eV (C1) |
| <br>391<br>O12Th6.q0.m1-1239<br>6.89 eV (C1) | <br>392<br>O12Th6.q0.m1-1224<br>6.92 eV (C1) | <br>393<br>O12Th6.q0.m1-1195<br>6.93 eV (C1) | <br>394<br>O12Th6.q0.m1-1206<br>6.92 eV (C1) | <br>395<br>O12Th6.q0.m1-1210<br>6.99 eV (C1) | <br>396<br>O12Th6.q0.m1-1226<br>7.03 eV (C1) |

| Th <sub>6</sub> O <sub>12</sub> (Continued from previous page)                                                                  |                                                                                                                                 |                                                                                                                                 |                                                                                                                                 |                                                                                                                                   |                                                                                                                                   |
|---------------------------------------------------------------------------------------------------------------------------------|---------------------------------------------------------------------------------------------------------------------------------|---------------------------------------------------------------------------------------------------------------------------------|---------------------------------------------------------------------------------------------------------------------------------|-----------------------------------------------------------------------------------------------------------------------------------|-----------------------------------------------------------------------------------------------------------------------------------|
| 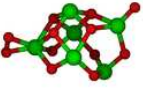<br>397<br>O12Th6.q0.m1-1267<br>7.04 eV (C1)   | <br>398<br>O12Th6.q0.m1-1209<br>7.06 eV (C1)   | <br>399<br>O12Th6.q0.m1-632<br>7.19 eV (C1)    | <br>400<br>O12Th6.q0.m1-1241<br>7.22 eV (C1)   | <br>401<br>O12Th6.q0.m1-1231<br>7.23 eV (C1)   | <br>402<br>O12Th6.q0.m1-504<br>7.31 eV (C1)    |
| <br>403<br>O12Th6.q0.m1-1263<br>7.29 eV (C1)   | <br>404<br>O12Th6.q0.m1-1185<br>7.30 eV (C1)   | <br>405<br>O12Th6.q0.m1-1203<br>7.33 eV (C1)   | <br>406<br>O12Th6.q0.m1-540<br>7.29 eV (C1)    | <br>407<br>O12Th6.q0.m1-372<br>7.31 eV (C1)    | <br>408<br>O12Th6.q0.m1-483<br>7.35 eV (C1)    |
| <br>409<br>O12Th6.q0.m1-1014<br>7.38 eV (C1)   | <br>410<br>O12Th6.q0.m1-1199<br>7.39 eV (C1)   | <br>411<br>O12Th6.q0.m1-987<br>7.44 eV (C1)    | <br>412<br>O12Th6.q0.m1-1190<br>7.50 eV (C1)   | <br>413<br>O12Th6.q0.m1-1247<br>7.52 eV (C1)   | <br>414<br>O12Th6.q0.m1-1251<br>7.60 eV (C1)   |
| <br>415<br>O12Th6.q0.m1-1204<br>7.64 eV (C1) | <br>416<br>O12Th6.q0.m1-1249<br>7.71 eV (C1) | <br>417<br>O12Th6.q0.m1-738<br>7.73 eV (C1)  | <br>418<br>O12Th6.q0.m1-1085<br>7.75 eV (C1) | <br>419<br>O12Th6.q0.m1-1223<br>7.71 eV (C1) | <br>420<br>O12Th6.q0.m1-1235<br>7.79 eV (C1) |
| <br>421<br>O12Th6.q0.m1-1088<br>7.84 eV (C1) | <br>422<br>O12Th6.q0.m1-744<br>7.87 eV (C1)  | <br>423<br>O12Th6.q0.m1-662<br>7.93 eV (C1)  | <br>424<br>O12Th6.q0.m1-500<br>7.95 eV (C1)  | <br>425<br>O12Th6.q0.m1-1262<br>7.92 eV (C1) | <br>426<br>O12Th6.q0.m1-668<br>8.04 eV (C1)  |
| <br>427<br>O12Th6.q0.m1-597<br>8.08 eV (C1)  | <br>428<br>O12Th6.q0.m1-1091<br>8.11 eV (C1) | <br>429<br>O12Th6.q0.m1-1229<br>8.15 eV (C1) | <br>430<br>O12Th6.q0.m1-590<br>8.16 eV (C1)  | <br>431<br>O12Th6.q0.m1-1253<br>8.17 eV (C1) | <br>432<br>O12Th6.q0.m1-1188<br>8.32 eV (C1) |

| Th <sub>6</sub> O <sub>12</sub> (Continued from previous page)                                                                   |                                                                                                                                  |                                                                                                                                  |                                                                                                                                  |                                                                                                                                    |                                                                                                                                    |
|----------------------------------------------------------------------------------------------------------------------------------|----------------------------------------------------------------------------------------------------------------------------------|----------------------------------------------------------------------------------------------------------------------------------|----------------------------------------------------------------------------------------------------------------------------------|------------------------------------------------------------------------------------------------------------------------------------|------------------------------------------------------------------------------------------------------------------------------------|
| 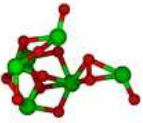<br>433<br>O12Th6.q0.m1-507<br>8.37 eV (C1)     | <br>434<br>O12Th6.q0.m1-1233<br>8.39 eV (C1)    | <br>435<br>O12Th6.q0.m1-1200<br>8.42 eV (C1)    | <br>436<br>O12Th6.q0.m1-1264<br>8.46 eV (C1)    | <br>437<br>O12Th6.q0.m1-1238<br>8.47 eV (C1)    | <br>438<br>O12Th6.q0.m1-1266<br>8.53 eV (CS)    |
| <br>439<br>O12Th6.q0.m1-1230<br>8.57 eV (C1)    | <br>440<br>O12Th6.q0.m1-1217<br>8.60 eV (C1)    | <br>441<br>O12Th6.q0.m1-1212<br>8.65 eV (C1)    | <br>442<br>O12Th6.q0.m1-1034<br>8.70 eV (C1)    | <br>443<br>O12Th6.q0.m1-759<br>8.72 eV (C1)     | <br>444<br>O12Th6.q0.m1-1186<br>8.77 eV (C1)    |
| <br>445<br>O12Th6.q0.m1-1201<br>9.16 eV (C1)    | <br>446<br>O12Th6.q0.m1-1187<br>9.21 eV (C1)    | <br>447<br>O12Th6.q0.m1-1213<br>9.39 eV (C1)    | <br>448<br>O12Th6.q0.m1-1237<br>9.47 eV (C1)    | <br>449<br>O12Th6.q0.m1-1198<br>10.09 eV (C1)   | <br>450<br>O12Th6.q0.m1-1234<br>11.18 eV (C1)   |
| <br>451<br>O12Th6.q0.m1-1259<br>11.63 eV (C1) | <br>452<br>O12Th6.q0.m1-1260<br>11.78 eV (C1) | <br>453<br>O12Th6.q0.m1-1243<br>11.95 eV (C1) | <br>454<br>O12Th6.q0.m1-1205<br>12.08 eV (C1) | <br>455<br>O12Th6.q0.m1-1240<br>12.38 eV (C1) | <br>456<br>O12Th6.q0.m1-1227<br>12.64 eV (C1) |
| <br>457<br>O12Th6.q0.m1-1232<br>12.70 eV (C1) | <br>458<br>O12Th6.q0.m1-1216<br>13.54 eV (C1) | <br>459<br>O12Th6.q0.m1-1256<br>13.63 eV (C1) | <br>460<br>O12Th6.q0.m1-1220<br>14.20 eV (C1) | <br>461<br>O12Th6.q0.m1-1248<br>14.30 eV (C1) | <br>462<br>O12Th6.q0.m1-1194<br>14.30 eV (C1) |
| <br>463<br>O12Th6.q0.m1-1245<br>14.65 eV (C1) | <br>464<br>O12Th6.q0.m1-1228<br>15.47 eV (C1) | <br>465<br>O12Th6.q0.m1-1244<br>18.73 eV (C1) |                                                                                                                                  |                                                                                                                                    |                                                                                                                                    |

| Th <sub>7</sub> O <sub>14</sub>                                                                                               |                                                                                                                               |                                                                                                                               |                                                                                                                                |                                                                                                                                  |                                                                                                                                 |
|-------------------------------------------------------------------------------------------------------------------------------|-------------------------------------------------------------------------------------------------------------------------------|-------------------------------------------------------------------------------------------------------------------------------|--------------------------------------------------------------------------------------------------------------------------------|----------------------------------------------------------------------------------------------------------------------------------|---------------------------------------------------------------------------------------------------------------------------------|
| 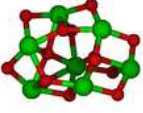<br>1<br>O14Th7.q0.m1-1040<br>0.000 eV (C1)  | <br>2<br>O14Th7.q0.m1-1135<br>0.006 eV (C2)  | <br>3<br>O14Th7.q0.m1-615<br>0.05 eV (CS)    | <br>4<br>O14Th7.q0.m1-686<br>0.14 eV (C1)     | <br>5<br>O14Th7.q0.m1-780<br>0.21 eV (C1)     | <br>6<br>O14Th7.q0.m1-424<br>0.21 eV (C1)    |
| <br>7<br>O14Th7.q0.m1-124<br>0.23 eV (C1)    | <br>8<br>O14Th7.q0.m1-295<br>0.24 eV (C1)    | <br>9<br>O14Th7.q0.m1-626<br>0.29 eV (C1)    | <br>10<br>O14Th7.q0.m1-700<br>0.30 eV (C1)    | <br>11<br>O14Th7.q0.m1-960<br>0.31 eV (C1)    | <br>12<br>O14Th7.q0.m1-378<br>0.38 eV (C1)   |
| <br>13<br>O14Th7.q0.m1-1004<br>0.42 eV (C1)  | <br>14<br>O14Th7.q0.m1-272<br>0.41 eV (C1)   | <br>15<br>O14Th7.q0.m1-569<br>0.44 eV (C1)   | <br>16<br>O14Th7.q0.m1-298<br>0.59 eV (C1)    | <br>17<br>O14Th7.q0.m1-776<br>0.69 eV (C2V)   | <br>18<br>O14Th7.q0.m1-280<br>0.73 eV (CS)   |
| <br>19<br>O14Th7.q0.m1-707<br>0.86 eV (C1) | <br>20<br>O14Th7.q0.m1-958<br>0.88 eV (C1) | <br>21<br>O14Th7.q0.m1-511<br>0.86 eV (C1) | <br>22<br>O14Th7.q0.m1-156<br>0.89 eV (C1)  | <br>23<br>O14Th7.q0.m1-1086<br>0.97 eV (C1) | <br>24<br>O14Th7.q0.m1-15<br>0.99 eV (C1)  |
| <br>25<br>O14Th7.q0.m1-147<br>1.04 eV (C1) | <br>26<br>O14Th7.q0.m1-557<br>1.01 eV (C1) | <br>27<br>O14Th7.q0.m1-310<br>1.05 eV (CS) | <br>28<br>O14Th7.q0.m1-919<br>1.08 eV (C1)  | <br>29<br>O14Th7.q0.m1-262<br>1.10 eV (C1)  | <br>30<br>O14Th7.q0.m1-194<br>1.12 eV (C1) |
| <br>31<br>O14Th7.q0.m1-263<br>1.13 eV (C1) | <br>32<br>O14Th7.q0.m1-342<br>1.16 eV (C1) | <br>33<br>O14Th7.q0.m1-727<br>1.17 eV (C1) | <br>34<br>O14Th7.q0.m1-1099<br>1.18 eV (C1) | <br>35<br>O14Th7.q0.m1-176<br>1.18 eV (C1)  | <br>36<br>O14Th7.q0.m1-541<br>1.22 eV (C1) |

| Th <sub>7</sub> O <sub>14</sub> (Continued from previous page)                      |                                                                                     |                                                                                     |                                                                                     |                                                                                       |                                                                                       |
|-------------------------------------------------------------------------------------|-------------------------------------------------------------------------------------|-------------------------------------------------------------------------------------|-------------------------------------------------------------------------------------|---------------------------------------------------------------------------------------|---------------------------------------------------------------------------------------|
| 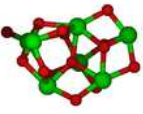   |    |    |    |    |    |
| 37<br>O14Th7.q0.m1-553<br>1.26 eV (C1)                                              | 38<br>O14Th7.q0.m1-125<br>1.27 eV (C1)                                              | 39<br>O14Th7.q0.m1-490<br>1.29 eV (C1)                                              | 40<br>O14Th7.q0.m1-467<br>1.30 eV (C1)                                              | 41<br>O14Th7.q0.m1-443<br>1.31 eV (C1)                                                | 42<br>O14Th7.q0.m1-925<br>1.33 eV (C1)                                                |
|    |    |    |    |    |    |
| 43<br>O14Th7.q0.m1-475<br>1.35 eV (C1)                                              | 44<br>O14Th7.q0.m1-1100<br>1.33 eV (C1)                                             | 45<br>O14Th7.q0.m1-824<br>1.33 eV (C1)                                              | 46<br>O14Th7.q0.m1-1056<br>1.40 eV (C1)                                             | 47<br>O14Th7.q0.m1-1142<br>1.40 eV (C1)                                               | 48<br>O14Th7.q0.m1-120<br>1.38 eV (C1)                                                |
|    |    |    |    |    |    |
| 49<br>O14Th7.q0.m1-944<br>1.41 eV (C1)                                              | 50<br>O14Th7.q0.m1-211<br>1.41 eV (C1)                                              | 51<br>O14Th7.q0.m1-841<br>1.41 eV (C1)                                              | 52<br>O14Th7.q0.m1-619<br>1.42 eV (C1)                                              | 53<br>O14Th7.q0.m1-757<br>1.39 eV (C1)                                                | 54<br>O14Th7.q0.m1-1096<br>1.43 eV (C1)                                               |
|  |  |  |  |  |  |
| 55<br>O14Th7.q0.m1-909<br>1.42 eV (C1)                                              | 56<br>O14Th7.q0.m1-240<br>1.42 eV (C1)                                              | 57<br>O14Th7.q0.m1-1015<br>1.46 eV (C1)                                             | 58<br>O14Th7.q0.m1-359<br>1.47 eV (C1)                                              | 59<br>O14Th7.q0.m1-1078<br>1.45 eV (C1)                                               | 60<br>O14Th7.q0.m1-317<br>1.45 eV (C1)                                                |
|  |  |  |  |  |  |
| 61<br>O14Th7.q0.m1-570<br>1.47 eV (C1)                                              | 62<br>O14Th7.q0.m1-144<br>1.52 eV (CS)                                              | 63<br>O14Th7.q0.m1-466<br>1.52 eV (C1)                                              | 64<br>O14Th7.q0.m1-954<br>1.56 eV (C1)                                              | 65<br>O14Th7.q0.m1-209<br>1.55 eV (C1)                                                | 66<br>O14Th7.q0.m1-1123<br>1.56 eV (C1)                                               |
|  |  |  |  |  |  |
| 67<br>O14Th7.q0.m1-301<br>1.55 eV (C1)                                              | 68<br>O14Th7.q0.m1-1062<br>1.55 eV (C1)                                             | 69<br>O14Th7.q0.m1-422<br>1.57 eV (C3V)                                             | 70<br>O14Th7.q0.m1-556<br>1.59 eV (C1)                                              | 71<br>O14Th7.q0.m1-347<br>1.58 eV (CS)                                                | 72<br>O14Th7.q0.m1-25<br>1.60 eV (C1)                                                 |

| $\text{Th}_7\text{O}_{14}$ (Continued from previous page)                                                                      |                                                                                                                                |                                                                                                                                 |                                                                                                                                |                                                                                                                                   |                                                                                                                                  |
|--------------------------------------------------------------------------------------------------------------------------------|--------------------------------------------------------------------------------------------------------------------------------|---------------------------------------------------------------------------------------------------------------------------------|--------------------------------------------------------------------------------------------------------------------------------|-----------------------------------------------------------------------------------------------------------------------------------|----------------------------------------------------------------------------------------------------------------------------------|
| 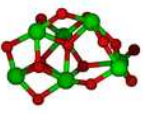<br>73<br>O14Th7.q0.m1-1122<br>1.59 eV (C1)   | <br>74<br>O14Th7.q0.m1-271<br>1.61 eV (C1)    | <br>75<br>O14Th7.q0.m1-228<br>1.62 eV (C1)     | <br>76<br>O14Th7.q0.m1-184<br>1.62 eV (C1)    | <br>77<br>O14Th7.q0.m1-1013<br>1.62 eV (C1)    | <br>78<br>O14Th7.q0.m1-56<br>1.63 eV (C1)     |
| <br>79<br>O14Th7.q0.m1-208<br>1.63 eV (C1)    | <br>80<br>O14Th7.q0.m1-676<br>1.62 eV (C1)    | <br>81<br>O14Th7.q0.m1-187<br>1.63 eV (C1)     | <br>82<br>O14Th7.q0.m1-1057<br>1.64 eV (C1)   | <br>83<br>O14Th7.q0.m1-457<br>1.65 eV (C1)     | <br>84<br>O14Th7.q0.m1-732<br>1.66 eV (C1)    |
| <br>85<br>O14Th7.q0.m1-31<br>1.67 eV (C1)     | <br>86<br>O14Th7.q0.m1-409<br>1.72 eV (C1)    | <br>87<br>O14Th7.q0.m1-72<br>1.72 eV (C1)      | <br>88<br>O14Th7.q0.m1-623<br>1.77 eV (C1)    | <br>89<br>O14Th7.q0.m1-416<br>1.73 eV (C1)     | <br>90<br>O14Th7.q0.m1-68<br>1.75 eV (C1)     |
| <br>91<br>O14Th7.q0.m1-834<br>1.75 eV (C1)  | <br>92<br>O14Th7.q0.m1-351<br>1.77 eV (C1)  | <br>93<br>O14Th7.q0.m1-660<br>1.76 eV (CS)   | <br>94<br>O14Th7.q0.m1-568<br>1.76 eV (C1)  | <br>95<br>O14Th7.q0.m1-1137<br>1.76 eV (C1)  | <br>96<br>O14Th7.q0.m1-1018<br>1.79 eV (C1) |
| <br>97<br>O14Th7.q0.m1-1008<br>1.76 eV (C1) | <br>98<br>O14Th7.q0.m1-1045<br>1.80 eV (C1) | <br>99<br>O14Th7.q0.m1-989<br>1.78 eV (C1)   | <br>100<br>O14Th7.q0.m1-82<br>1.80 eV (C1)  | <br>101<br>O14Th7.q0.m1-243<br>1.82 eV (C1)  | <br>102<br>O14Th7.q0.m1-300<br>1.81 eV (C1) |
| <br>103<br>O14Th7.q0.m1-830<br>1.84 eV (C1) | <br>104<br>O14Th7.q0.m1-11<br>1.82 eV (C1)  | <br>105<br>O14Th7.q0.m1-1053<br>1.84 eV (C1) | <br>106<br>O14Th7.q0.m1-878<br>1.83 eV (C1) | <br>107<br>O14Th7.q0.m1-1152<br>1.85 eV (C1) | <br>108<br>O14Th7.q0.m1-166<br>1.89 eV (C1) |

| Th <sub>7</sub> O <sub>14</sub> (Continued from previous page)                                                                 |                                                                                                                                 |                                                                                                                                |                                                                                                                                |                                                                                                                                  |                                                                                                                                  |
|--------------------------------------------------------------------------------------------------------------------------------|---------------------------------------------------------------------------------------------------------------------------------|--------------------------------------------------------------------------------------------------------------------------------|--------------------------------------------------------------------------------------------------------------------------------|----------------------------------------------------------------------------------------------------------------------------------|----------------------------------------------------------------------------------------------------------------------------------|
| 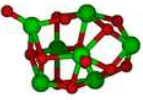<br>109<br>O14Th7.q0.m1-57<br>1.89 eV (C1)    | <br>110<br>O14Th7.q0.m1-1085<br>1.88 eV (CS)   | <br>111<br>O14Th7.q0.m1-458<br>1.89 eV (C1)   | <br>112<br>O14Th7.q0.m1-614<br>1.91 eV (C1)   | <br>113<br>O14Th7.q0.m1-236<br>1.92 eV (C1)   | <br>114<br>O14Th7.q0.m1-571<br>1.95 eV (C1)   |
| <br>115<br>O14Th7.q0.m1-1017<br>1.92 eV (C1)  | <br>116<br>O14Th7.q0.m1-428<br>1.96 eV (C1)    | <br>117<br>O14Th7.q0.m1-361<br>1.97 eV (C1)   | <br>118<br>O14Th7.q0.m1-432<br>1.99 eV (C1)   | <br>119<br>O14Th7.q0.m1-846<br>1.99 eV (C1)   | <br>120<br>O14Th7.q0.m1-138<br>1.98 eV (C1)   |
| <br>121<br>O14Th7.q0.m1-552<br>2.00 eV (C1)   | <br>122<br>O14Th7.q0.m1-130<br>1.97 eV (C1)    | <br>123<br>O14Th7.q0.m1-1073<br>1.98 eV (C1)  | <br>124<br>O14Th7.q0.m1-89<br>2.02 eV (C1)    | <br>125<br>O14Th7.q0.m1-887<br>1.99 eV (C1)   | <br>126<br>O14Th7.q0.m1-742<br>1.99 eV (C1)   |
| <br>127<br>O14Th7.q0.m1-78<br>2.02 eV (C1)  | <br>128<br>O14Th7.q0.m1-1097<br>2.02 eV (C1) | <br>129<br>O14Th7.q0.m1-246<br>2.03 eV (C1) | <br>130<br>O14Th7.q0.m1-123<br>2.02 eV (C1) | <br>131<br>O14Th7.q0.m1-278<br>2.03 eV (C1) | <br>132<br>O14Th7.q0.m1-222<br>2.03 eV (C1) |
| <br>133<br>O14Th7.q0.m1-369<br>2.03 eV (C1) | <br>134<br>O14Th7.q0.m1-126<br>2.06 eV (C1)  | <br>135<br>O14Th7.q0.m1-781<br>2.05 eV (C1) | <br>136<br>O14Th7.q0.m1-171<br>2.04 eV (C1) | <br>137<br>O14Th7.q0.m1-175<br>2.04 eV (C1) | <br>138<br>O14Th7.q0.m1-71<br>2.06 eV (C1)  |
| <br>139<br>O14Th7.q0.m1-702<br>2.07 eV (C1) | <br>140<br>O14Th7.q0.m1-1143<br>2.09 eV (C1) | <br>141<br>O14Th7.q0.m1-441<br>2.08 eV (C1) | <br>142<br>O14Th7.q0.m1-32<br>2.11 eV (C1)  | <br>143<br>O14Th7.q0.m1-143<br>2.09 eV (C1) | <br>144<br>O14Th7.q0.m1-822<br>2.09 eV (C1) |

| $\text{Th}_7\text{O}_{14}$ (Continued from previous page)                           |                                                                                     |                                                                                     |                                                                                     |                                                                                       |                                                                                       |
|-------------------------------------------------------------------------------------|-------------------------------------------------------------------------------------|-------------------------------------------------------------------------------------|-------------------------------------------------------------------------------------|---------------------------------------------------------------------------------------|---------------------------------------------------------------------------------------|
| 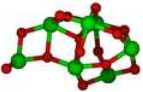   |    |    |    |    |    |
| 145<br>O14Th7.q0.m1-1041<br>2.11 eV (C1)                                            | 146<br>O14Th7.q0.m1-1090<br>2.14 eV (CS)                                            | 147<br>O14Th7.q0.m1-285<br>2.14 eV (C1)                                             | 148<br>O14Th7.q0.m1-13<br>2.14 eV (C1)                                              | 149<br>O14Th7.q0.m1-1042<br>2.15 eV (C1)                                              | 150<br>O14Th7.q0.m1-1061<br>2.18 eV (CS)                                              |
|    |    |    |    |    |    |
| 151<br>O14Th7.q0.m1-1058<br>2.16 eV (CS)                                            | 152<br>O14Th7.q0.m1-1082<br>2.18 eV (C1)                                            | 153<br>O14Th7.q0.m1-625<br>2.17 eV (C1)                                             | 154<br>O14Th7.q0.m1-146<br>2.17 eV (C1)                                             | 155<br>O14Th7.q0.m1-150<br>2.17 eV (C1)                                               | 156<br>O14Th7.q0.m1-1052<br>2.17 eV (C1)                                              |
|    |    |    |    |    |    |
| 157<br>O14Th7.q0.m1-1074<br>2.17 eV (C1)                                            | 158<br>O14Th7.q0.m1-1005<br>2.18 eV (C1)                                            | 159<br>O14Th7.q0.m1-920<br>2.20 eV (C1)                                             | 160<br>O14Th7.q0.m1-627<br>2.19 eV (C1)                                             | 161<br>O14Th7.q0.m1-170<br>2.21 eV (C1)                                               | 162<br>O14Th7.q0.m1-255<br>2.19 eV (CS)                                               |
|  |  |  |  |  |  |
| 163<br>O14Th7.q0.m1-164<br>2.22 eV (C1)                                             | 164<br>O14Th7.q0.m1-938<br>2.25 eV (C1)                                             | 165<br>O14Th7.q0.m1-73<br>2.23 eV (C1)                                              | 166<br>O14Th7.q0.m1-366<br>2.25 eV (C1)                                             | 167<br>O14Th7.q0.m1-1033<br>2.22 eV (C1)                                              | 168<br>O14Th7.q0.m1-512<br>2.26 eV (C1)                                               |
|  |  |  |  |  |  |
| 169<br>O14Th7.q0.m1-41<br>2.25 eV (C1)                                              | 170<br>O14Th7.q0.m1-1131<br>2.28 eV (C1)                                            | 171<br>O14Th7.q0.m1-922<br>2.26 eV (C1)                                             | 172<br>O14Th7.q0.m1-837<br>2.26 eV (C1)                                             | 173<br>O14Th7.q0.m1-47<br>2.26 eV (C1)                                                | 174<br>O14Th7.q0.m1-162<br>2.28 eV (C1)                                               |
|  |  |  |  |  |  |
| 175<br>O14Th7.q0.m1-611<br>2.30 eV (C1)                                             | 176<br>O14Th7.q0.m1-505<br>2.29 eV (C1)                                             | 177<br>O14Th7.q0.m1-1103<br>2.29 eV (C1)                                            | 178<br>O14Th7.q0.m1-1127<br>2.31 eV (C1)                                            | 179<br>O14Th7.q0.m1-847<br>2.32 eV (C1)                                               | 180<br>O14Th7.q0.m1-576<br>2.35 eV (C1)                                               |

| Th <sub>7</sub> O <sub>14</sub> (Continued from previous page)                                                                  |                                                                                                                                 |                                                                                                                                |                                                                                                                                |                                                                                                                                  |                                                                                                                                   |
|---------------------------------------------------------------------------------------------------------------------------------|---------------------------------------------------------------------------------------------------------------------------------|--------------------------------------------------------------------------------------------------------------------------------|--------------------------------------------------------------------------------------------------------------------------------|----------------------------------------------------------------------------------------------------------------------------------|-----------------------------------------------------------------------------------------------------------------------------------|
| 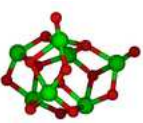<br>181<br>O14Th7.q0.m1-242<br>2.31 eV (C1)    | <br>182<br>O14Th7.q0.m1-400<br>2.32 eV (C1)    | <br>183<br>O14Th7.q0.m1-315<br>2.33 eV (C1)   | <br>184<br>O14Th7.q0.m1-681<br>2.33 eV (C1)   | <br>185<br>O14Th7.q0.m1-1095<br>2.31 eV (C1)  | <br>186<br>O14Th7.q0.m1-153<br>2.32 eV (C1)    |
| <br>187<br>O14Th7.q0.m1-661<br>2.36 eV (C1)    | <br>188<br>O14Th7.q0.m1-525<br>2.35 eV (C1)    | <br>189<br>O14Th7.q0.m1-95<br>2.36 eV (C1)    | <br>190<br>O14Th7.q0.m1-182<br>2.38 eV (C1)   | <br>191<br>O14Th7.q0.m1-1141<br>2.38 eV (C1)  | <br>192<br>O14Th7.q0.m1-1138<br>2.39 eV (C1)   |
| <br>193<br>O14Th7.q0.m1-956<br>2.37 eV (C1)    | <br>194<br>O14Th7.q0.m1-524<br>2.39 eV (C1)    | <br>195<br>O14Th7.q0.m1-114<br>2.38 eV (C1)   | <br>196<br>O14Th7.q0.m1-1130<br>2.38 eV (C1)  | <br>197<br>O14Th7.q0.m1-411<br>2.39 eV (C1)   | <br>198<br>O14Th7.q0.m1-1060<br>2.37 eV (C1)   |
| <br>199<br>O14Th7.q0.m1-835<br>2.39 eV (C1)  | <br>200<br>O14Th7.q0.m1-1046<br>2.40 eV (C1) | <br>201<br>O14Th7.q0.m1-975<br>2.40 eV (CS) | <br>202<br>O14Th7.q0.m1-42<br>2.41 eV (C1)  | <br>203<br>O14Th7.q0.m1-179<br>2.43 eV (C1) | <br>204<br>O14Th7.q0.m1-1001<br>2.42 eV (C1) |
| <br>205<br>O14Th7.q0.m1-1114<br>2.42 eV (C1) | <br>206<br>O14Th7.q0.m1-268<br>2.44 eV (CS)  | <br>207<br>O14Th7.q0.m1-396<br>2.43 eV (C1) | <br>208<br>O14Th7.q0.m1-122<br>2.44 eV (C1) | <br>209<br>O14Th7.q0.m1-603<br>2.43 eV (CS) | <br>210<br>O14Th7.q0.m1-1026<br>2.46 eV (C1) |
| <br>211<br>O14Th7.q0.m1-296<br>2.49 eV (C1)  | <br>212<br>O14Th7.q0.m1-751<br>2.50 eV (C1)  | <br>213<br>O14Th7.q0.m1-668<br>2.49 eV (C1) | <br>214<br>O14Th7.q0.m1-559<br>2.53 eV (C1) | <br>215<br>O14Th7.q0.m1-113<br>2.55 eV (C1) | <br>216<br>O14Th7.q0.m1-266<br>2.56 eV (C1)  |

| Th <sub>7</sub> O <sub>14</sub> (Continued from previous page)                                                                  |                                                                                                                                 |                                                                                                                                 |                                                                                                                                 |                                                                                                                                   |                                                                                                                                  |
|---------------------------------------------------------------------------------------------------------------------------------|---------------------------------------------------------------------------------------------------------------------------------|---------------------------------------------------------------------------------------------------------------------------------|---------------------------------------------------------------------------------------------------------------------------------|-----------------------------------------------------------------------------------------------------------------------------------|----------------------------------------------------------------------------------------------------------------------------------|
| 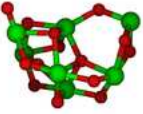<br>217<br>O14Th7.q0.m1-624<br>2.58 eV (C1)    | <br>218<br>O14Th7.q0.m1-1116<br>2.61 eV (C1)   | <br>219<br>O14Th7.q0.m1-1158<br>2.58 eV (C1)   | <br>220<br>O14Th7.q0.m1-514<br>2.61 eV (C1)    | <br>221<br>O14Th7.q0.m1-1037<br>2.61 eV (C1)   | <br>222<br>O14Th7.q0.m1-991<br>2.68 eV (C1)   |
| <br>223<br>O14Th7.q0.m1-1044<br>2.65 eV (C1)   | <br>224<br>O14Th7.q0.m1-753<br>2.68 eV (C1)    | <br>225<br>O14Th7.q0.m1-160<br>2.69 eV (C1)    | <br>226<br>O14Th7.q0.m1-360<br>2.71 eV (C1)    | <br>227<br>O14Th7.q0.m1-596<br>2.72 eV (C1)    | <br>228<br>O14Th7.q0.m1-932<br>2.68 eV (C1)   |
| <br>229<br>O14Th7.q0.m1-855<br>2.72 eV (C1)    | <br>230<br>O14Th7.q0.m1-562<br>2.71 eV (C1)    | <br>231<br>O14Th7.q0.m1-297<br>2.74 eV (C1)    | <br>232<br>O14Th7.q0.m1-449<br>2.76 eV (C1)    | <br>233<br>O14Th7.q0.m1-387<br>2.71 eV (C1)    | <br>234<br>O14Th7.q0.m1-383<br>2.75 eV (C1)   |
| <br>235<br>O14Th7.q0.m1-1139<br>2.77 eV (C1) | <br>236<br>O14Th7.q0.m1-1064<br>2.77 eV (C1) | <br>237<br>O14Th7.q0.m1-159<br>2.75 eV (C1)  | <br>238<br>O14Th7.q0.m1-678<br>2.77 eV (C1)  | <br>239<br>O14Th7.q0.m1-178<br>2.77 eV (C1)  | <br>240<br>O14Th7.q0.m1-463<br>2.77 eV (C1) |
| <br>241<br>O14Th7.q0.m1-154<br>2.76 eV (C1)  | <br>242<br>O14Th7.q0.m1-963<br>2.78 eV (C1)  | <br>243<br>O14Th7.q0.m1-362<br>2.75 eV (C1)  | <br>244<br>O14Th7.q0.m1-1020<br>2.77 eV (C1) | <br>245<br>O14Th7.q0.m1-1012<br>2.78 eV (C1) | <br>246<br>O14Th7.q0.m1-453<br>2.78 eV (C1) |
| <br>247<br>O14Th7.q0.m1-509<br>2.82 eV (C1)  | <br>248<br>O14Th7.q0.m1-756<br>2.77 eV (C1)  | <br>249<br>O14Th7.q0.m1-1106<br>2.79 eV (C1) | <br>250<br>O14Th7.q0.m1-1023<br>2.80 eV (C1) | <br>251<br>O14Th7.q0.m1-1132<br>2.83 eV (C1) | <br>252<br>O14Th7.q0.m1-74<br>2.83 eV (C1)  |

| Th <sub>7</sub> O <sub>14</sub> (Continued from previous page)                                                                 |                                                                                                                                 |                                                                                                                                |                                                                                                                                 |                                                                                                                                  |                                                                                                                                  |
|--------------------------------------------------------------------------------------------------------------------------------|---------------------------------------------------------------------------------------------------------------------------------|--------------------------------------------------------------------------------------------------------------------------------|---------------------------------------------------------------------------------------------------------------------------------|----------------------------------------------------------------------------------------------------------------------------------|----------------------------------------------------------------------------------------------------------------------------------|
| 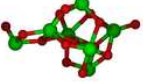<br>253<br>O14Th7.q0.m1-593<br>2.84 eV (C1)   | <br>254<br>O14Th7.q0.m1-286<br>2.84 eV (C1)    | <br>255<br>O14Th7.q0.m1-498<br>2.86 eV (C1)   | <br>256<br>O14Th7.q0.m1-290<br>2.87 eV (C1)    | <br>257<br>O14Th7.q0.m1-1094<br>2.87 eV (C1)  | <br>258<br>O14Th7.q0.m1-869<br>2.86 eV (C1)   |
| <br>259<br>O14Th7.q0.m1-578<br>2.86 eV (C1)   | <br>260<br>O14Th7.q0.m1-311<br>2.86 eV (C1)    | <br>261<br>O14Th7.q0.m1-1134<br>2.87 eV (C1)  | <br>262<br>O14Th7.q0.m1-980<br>2.88 eV (C1)    | <br>263<br>O14Th7.q0.m1-12<br>2.86 eV (C1)    | <br>264<br>O14Th7.q0.m1-581<br>2.89 eV (C1)   |
| <br>265<br>O14Th7.q0.m1-750<br>2.90 eV (C1)   | <br>266<br>O14Th7.q0.m1-177<br>2.93 eV (C1)    | <br>267<br>O14Th7.q0.m1-115<br>2.94 eV (C1)   | <br>268<br>O14Th7.q0.m1-105<br>2.95 eV (C1)    | <br>269<br>O14Th7.q0.m1-1055<br>2.96 eV (C1)  | <br>270<br>O14Th7.q0.m1-445<br>2.97 eV (C1)   |
| <br>271<br>O14Th7.q0.m1-876<br>2.96 eV (C1) | <br>272<br>O14Th7.q0.m1-889<br>2.99 eV (C1)  | <br>273<br>O14Th7.q0.m1-10<br>2.99 eV (C1)  | <br>274<br>O14Th7.q0.m1-560<br>2.99 eV (C1)  | <br>275<br>O14Th7.q0.m1-691<br>3.01 eV (C1) | <br>276<br>O14Th7.q0.m1-765<br>3.01 eV (C1) |
| <br>277<br>O14Th7.q0.m1-18<br>3.02 eV (C1)  | <br>278<br>O14Th7.q0.m1-1054<br>3.03 eV (C1) | <br>279<br>O14Th7.q0.m1-657<br>3.04 eV (C1) | <br>280<br>O14Th7.q0.m1-965<br>3.03 eV (C1)  | <br>281<br>O14Th7.q0.m1-664<br>3.04 eV (C1) | <br>282<br>O14Th7.q0.m1-682<br>3.05 eV (C1) |
| <br>283<br>O14Th7.q0.m1-450<br>3.05 eV (C1) | <br>284<br>O14Th7.q0.m1-594<br>3.07 eV (C1)  | <br>285<br>O14Th7.q0.m1-381<br>3.09 eV (C1) | <br>286<br>O14Th7.q0.m1-1035<br>3.10 eV (C1) | <br>287<br>O14Th7.q0.m1-772<br>3.11 eV (C1) | <br>288<br>O14Th7.q0.m1-696<br>3.10 eV (C1) |

| $\text{Th}_7\text{O}_{14}$ (Continued from previous page)                                                                       |                                                                                                                                |                                                                                                                                |                                                                                                                                 |                                                                                                                                   |                                                                                                                                  |
|---------------------------------------------------------------------------------------------------------------------------------|--------------------------------------------------------------------------------------------------------------------------------|--------------------------------------------------------------------------------------------------------------------------------|---------------------------------------------------------------------------------------------------------------------------------|-----------------------------------------------------------------------------------------------------------------------------------|----------------------------------------------------------------------------------------------------------------------------------|
| 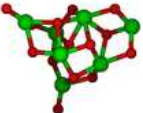<br>289<br>O14Th7.q0.m1-8<br>3.09 eV (C1)      | <br>290<br>O14Th7.q0.m1-1083<br>3.12 eV (C1)  | <br>291<br>O14Th7.q0.m1-431<br>3.14 eV (C1)   | <br>292<br>O14Th7.q0.m1-820<br>3.16 eV (C1)    | <br>293<br>O14Th7.q0.m1-744<br>3.18 eV (C1)    | <br>294<br>O14Th7.q0.m1-1126<br>3.18 eV (C1)  |
| <br>295<br>O14Th7.q0.m1-302<br>3.17 eV (C1)    | <br>296<br>O14Th7.q0.m1-44<br>3.20 eV (C1)    | <br>297<br>O14Th7.q0.m1-23<br>3.18 eV (C1)    | <br>298<br>O14Th7.q0.m1-890<br>3.20 eV (C1)    | <br>299<br>O14Th7.q0.m1-258<br>3.22 eV (C1)    | <br>300<br>O14Th7.q0.m1-563<br>3.22 eV (C1)   |
| <br>301<br>O14Th7.q0.m1-152<br>3.20 eV (C1)    | <br>302<br>O14Th7.q0.m1-993<br>3.22 eV (C1)   | <br>303<br>O14Th7.q0.m1-667<br>3.22 eV (C1)   | <br>304<br>O14Th7.q0.m1-1150<br>3.26 eV (C1)   | <br>305<br>O14Th7.q0.m1-689<br>3.25 eV (C1)    | <br>306<br>O14Th7.q0.m1-662<br>3.24 eV (C1)   |
| <br>307<br>O14Th7.q0.m1-21<br>3.27 eV (C1)   | <br>308<br>O14Th7.q0.m1-183<br>3.25 eV (C1) | <br>309<br>O14Th7.q0.m1-135<br>3.27 eV (C1) | <br>310<br>O14Th7.q0.m1-637<br>3.27 eV (C1)  | <br>311<br>O14Th7.q0.m1-5<br>3.24 eV (C1)    | <br>312<br>O14Th7.q0.m1-388<br>3.25 eV (C1) |
| <br>313<br>O14Th7.q0.m1-482<br>3.26 eV (C1)  | <br>314<br>O14Th7.q0.m1-447<br>3.29 eV (C1) | <br>315<br>O14Th7.q0.m1-157<br>3.27 eV (C1) | <br>316<br>O14Th7.q0.m1-52<br>3.26 eV (C1)   | <br>317<br>O14Th7.q0.m1-564<br>3.28 eV (C1)  | <br>318<br>O14Th7.q0.m1-250<br>3.30 eV (C1) |
| <br>319<br>O14Th7.q0.m1-1091<br>3.28 eV (C1) | <br>320<br>O14Th7.q0.m1-590<br>3.33 eV (C1) | <br>321<br>O14Th7.q0.m1-730<br>3.39 eV (C1) | <br>322<br>O14Th7.q0.m1-1112<br>3.38 eV (C1) | <br>323<br>O14Th7.q0.m1-1050<br>3.36 eV (C1) | <br>324<br>O14Th7.q0.m1-885<br>3.40 eV (C1) |

| Th <sub>7</sub> O <sub>14</sub> (Continued from previous page)                                                                 |                                                                                                                                |                                                                                                                                |                                                                                                                                 |                                                                                                                                  |                                                                                                                                   |
|--------------------------------------------------------------------------------------------------------------------------------|--------------------------------------------------------------------------------------------------------------------------------|--------------------------------------------------------------------------------------------------------------------------------|---------------------------------------------------------------------------------------------------------------------------------|----------------------------------------------------------------------------------------------------------------------------------|-----------------------------------------------------------------------------------------------------------------------------------|
| <br>325<br>O14Th7.q0.m1-148<br>3.39 eV (C1)   | <br>326<br>O14Th7.q0.m1-276<br>3.42 eV (CS)   | <br>327<br>O14Th7.q0.m1-547<br>3.40 eV (C1)   | <br>328<br>O14Th7.q0.m1-479<br>3.41 eV (C1)    | <br>329<br>O14Th7.q0.m1-307<br>3.44 eV (C1)   | <br>330<br>O14Th7.q0.m1-1075<br>3.48 eV (C1)   |
| <br>331<br>O14Th7.q0.m1-336<br>3.51 eV (CS)   | <br>332<br>O14Th7.q0.m1-812<br>3.50 eV (C1)   | <br>333<br>O14Th7.q0.m1-900<br>3.51 eV (C1)   | <br>334<br>O14Th7.q0.m1-391<br>3.52 eV (C1)    | <br>335<br>O14Th7.q0.m1-597<br>3.56 eV (C1)   | <br>336<br>O14Th7.q0.m1-604<br>3.60 eV (C1)    |
| <br>337<br>O14Th7.q0.m1-1039<br>3.61 eV (C1)  | <br>338<br>O14Th7.q0.m1-195<br>3.60 eV (C1)   | <br>339<br>O14Th7.q0.m1-136<br>3.63 eV (C1)   | <br>340<br>O14Th7.q0.m1-394<br>3.65 eV (C1)    | <br>341<br>O14Th7.q0.m1-674<br>3.66 eV (C1)   | <br>342<br>O14Th7.q0.m1-1034<br>3.74 eV (C1)   |
| <br>343<br>O14Th7.q0.m1-117<br>3.74 eV (C1) | <br>344<br>O14Th7.q0.m1-899<br>3.74 eV (C1) | <br>345<br>O14Th7.q0.m1-107<br>3.74 eV (C1) | <br>346<br>O14Th7.q0.m1-1159<br>3.77 eV (C1) | <br>347<br>O14Th7.q0.m1-573<br>3.80 eV (C1) | <br>348<br>O14Th7.q0.m1-259<br>3.85 eV (C1)  |
| <br>349<br>O14Th7.q0.m1-106<br>3.82 eV (C1) | <br>350<br>O14Th7.q0.m1-247<br>3.92 eV (C1) | <br>351<br>O14Th7.q0.m1-77<br>3.92 eV (C1)  | <br>352<br>O14Th7.q0.m1-1051<br>3.92 eV (C1) | <br>353<br>O14Th7.q0.m1-997<br>3.91 eV (C1) | <br>354<br>O14Th7.q0.m1-1043<br>3.94 eV (C1) |
| <br>355<br>O14Th7.q0.m1-692<br>3.94 eV (C1) | <br>356<br>O14Th7.q0.m1-417<br>3.96 eV (C1) | <br>357<br>O14Th7.q0.m1-459<br>4.01 eV (C1) | <br>358<br>O14Th7.q0.m1-249<br>3.99 eV (C1)  | <br>359<br>O14Th7.q0.m1-149<br>3.98 eV (C1) | <br>360<br>O14Th7.q0.m1-521<br>4.04 eV (C1)  |

| $\text{Th}_7\text{O}_{14}$ (Continued from previous page)                           |                                                                                     |                                                                                     |                                                                                     |                                                                                       |                                                                                       |
|-------------------------------------------------------------------------------------|-------------------------------------------------------------------------------------|-------------------------------------------------------------------------------------|-------------------------------------------------------------------------------------|---------------------------------------------------------------------------------------|---------------------------------------------------------------------------------------|
| 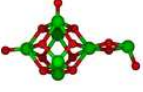   |    |    |    |    |    |
| 361<br>O14Th7.q0.m1-420<br>4.04 eV (C1)                                             | 362<br>O14Th7.q0.m1-419<br>4.05 eV (C1)                                             | 363<br>O14Th7.q0.m1-434<br>4.08 eV (C1)                                             | 364<br>O14Th7.q0.m1-481<br>4.09 eV (C1)                                             | 365<br>O14Th7.q0.m1-655<br>4.09 eV (C1)                                               | 366<br>O14Th7.q0.m1-316<br>4.11 eV (C1)                                               |
|    |    |    |    |    |    |
| 367<br>O14Th7.q0.m1-9<br>4.12 eV (C1)                                               | 368<br>O14Th7.q0.m1-451<br>4.13 eV (C1)                                             | 369<br>O14Th7.q0.m1-1140<br>4.20 eV (C1)                                            | 370<br>O14Th7.q0.m1-943<br>4.36 eV (C1)                                             | 371<br>O14Th7.q0.m1-693<br>4.40 eV (C1)                                               | 372<br>O14Th7.q0.m1-728<br>4.49 eV (C1)                                               |
|    |    |    |    |    |    |
| 373<br>O14Th7.q0.m1-731<br>4.50 eV (C1)                                             | 374<br>O14Th7.q0.m1-418<br>4.54 eV (C1)                                             | 375<br>O14Th7.q0.m1-332<br>4.61 eV (C1)                                             | 376<br>O14Th7.q0.m1-6<br>4.78 eV (C1)                                               | 377<br>O14Th7.q0.m1-373<br>5.39 eV (C1)                                               | 378<br>O14Th7.q0.m1-828<br>5.48 eV (C1)                                               |
|  |  |  |  |  |  |
| 379<br>O14Th7.q0.m1-1102<br>5.58 eV (C1)                                            | 380<br>O14Th7.q0.m1-328<br>5.59 eV (CS)                                             | 381<br>O14Th7.q0.m1-118<br>5.65 eV (C1)                                             | 382<br>O14Th7.q0.m1-190<br>5.69 eV (C1)                                             | 383<br>O14Th7.q0.m1-533<br>5.79 eV (C1)                                               | 384<br>O14Th7.q0.m1-119<br>5.83 eV (C1)                                               |
|  |  |  |  |  |  |
| 385<br>O14Th7.q0.m1-586<br>5.95 eV (C1)                                             | 386<br>O14Th7.q0.m1-323<br>5.95 eV (C1)                                             | 387<br>O14Th7.q0.m1-397<br>6.03 eV (C1)                                             | 388<br>O14Th7.q0.m1-368<br>6.09 eV (C1)                                             | 389<br>O14Th7.q0.m1-329<br>6.10 eV (CS)                                               | 390<br>O14Th7.q0.m1-905<br>6.18 eV (C1)                                               |
|  |  |  |  |  |  |
| 391<br>O14Th7.q0.m1-241<br>6.17 eV (C1)                                             | 392<br>O14Th7.q0.m1-142<br>6.19 eV (C1)                                             | 393<br>O14Th7.q0.m1-17<br>6.23 eV (C1)                                              | 394<br>O14Th7.q0.m1-134<br>6.22 eV (CS)                                             | 395<br>O14Th7.q0.m1-327<br>6.27 eV (C1)                                               | 396<br>O14Th7.q0.m1-798<br>6.28 eV (C1)                                               |

| Th <sub>7</sub> O <sub>14</sub> (Continued from previous page)                      |                                                                                     |                                                                                     |                                                                                     |                                                                                       |                                                                                       |
|-------------------------------------------------------------------------------------|-------------------------------------------------------------------------------------|-------------------------------------------------------------------------------------|-------------------------------------------------------------------------------------|---------------------------------------------------------------------------------------|---------------------------------------------------------------------------------------|
| 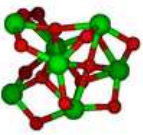   |    |    |    |    |    |
| 397<br>O14Th7.q0.m1-1087<br>6.32 eV (C1)                                            | 398<br>O14Th7.q0.m1-719<br>6.31 eV (C1)                                             | 399<br>O14Th7.q0.m1-981<br>6.31 eV (C1)                                             | 400<br>O14Th7.q0.m1-917<br>6.34 eV (C1)                                             | 401<br>O14Th7.q0.m1-100<br>6.36 eV (C1)                                               | 402<br>O14Th7.q0.m1-282<br>6.36 eV (C1)                                               |
|    |    |    |    |    |    |
| 403<br>O14Th7.q0.m1-354<br>6.36 eV (C1)                                             | 404<br>O14Th7.q0.m1-823<br>6.37 eV (C1)                                             | 405<br>O14Th7.q0.m1-141<br>6.38 eV (C1)                                             | 406<br>O14Th7.q0.m1-470<br>6.38 eV (C1)                                             | 407<br>O14Th7.q0.m1-436<br>6.42 eV (C1)                                               | 408<br>O14Th7.q0.m1-821<br>6.37 eV (C1)                                               |
|    |    |    |    |    |    |
| 409<br>O14Th7.q0.m1-1028<br>6.40 eV (C1)                                            | 410<br>O14Th7.q0.m1-233<br>6.40 eV (C1)                                             | 411<br>O14Th7.q0.m1-440<br>6.43 eV (C1)                                             | 412<br>O14Th7.q0.m1-663<br>6.45 eV (C1)                                             | 413<br>O14Th7.q0.m1-48<br>6.54 eV (C1)                                                | 414<br>O14Th7.q0.m1-968<br>6.50 eV (C1)                                               |
|  |  |  |  |  |  |
| 415<br>O14Th7.q0.m1-1136<br>6.53 eV (C1)                                            | 416<br>O14Th7.q0.m1-181<br>6.51 eV (C1)                                             | 417<br>O14Th7.q0.m1-370<br>6.52 eV (C1)                                             | 418<br>O14Th7.q0.m1-288<br>6.54 eV (C1)                                             | 419<br>O14Th7.q0.m1-350<br>6.55 eV (C1)                                               | 420<br>O14Th7.q0.m1-1108<br>6.56 eV (C1)                                              |
|  |  |  |  |  |  |
| 421<br>O14Th7.q0.m1-504<br>6.54 eV (C1)                                             | 422<br>O14Th7.q0.m1-256<br>6.56 eV (C1)                                             | 423<br>O14Th7.q0.m1-697<br>6.57 eV (C1)                                             | 424<br>O14Th7.q0.m1-49<br>6.60 eV (C1)                                              | 425<br>O14Th7.q0.m1-936<br>6.60 eV (C1)                                               | 426<br>O14Th7.q0.m1-426<br>6.60 eV (C1)                                               |
|  |  |  |  |  |  |
| 427<br>O14Th7.q0.m1-1031<br>6.67 eV (C1)                                            | 428<br>O14Th7.q0.m1-476<br>6.65 eV (C1)                                             | 429<br>O14Th7.q0.m1-234<br>6.65 eV (C1)                                             | 430<br>O14Th7.q0.m1-1160<br>6.66 eV (C1)                                            | 431<br>O14Th7.q0.m1-37<br>6.71 eV (C1)                                                | 432<br>O14Th7.q0.m1-496<br>6.69 eV (C1)                                               |

| $\text{Th}_7\text{O}_{14}$ (Continued from previous page)                                                                       |                                                                                                                                |                                                                                                                                 |                                                                                                                                |                                                                                                                                   |                                                                                                                                  |
|---------------------------------------------------------------------------------------------------------------------------------|--------------------------------------------------------------------------------------------------------------------------------|---------------------------------------------------------------------------------------------------------------------------------|--------------------------------------------------------------------------------------------------------------------------------|-----------------------------------------------------------------------------------------------------------------------------------|----------------------------------------------------------------------------------------------------------------------------------|
| 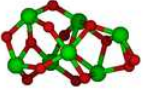<br>433<br>O14Th7.q0.m1-29<br>6.69 eV (C1)     | <br>434<br>O14Th7.q0.m1-748<br>6.73 eV (C1)   | <br>435<br>O14Th7.q0.m1-379<br>6.71 eV (C1)    | <br>436<br>O14Th7.q0.m1-722<br>6.74 eV (C1)   | <br>437<br>O14Th7.q0.m1-931<br>6.73 eV (C1)    | <br>438<br>O14Th7.q0.m1-907<br>6.76 eV (C1)   |
| <br>439<br>O14Th7.q0.m1-1161<br>6.74 eV (C1)   | <br>440<br>O14Th7.q0.m1-616<br>6.79 eV (C1)   | <br>441<br>O14Th7.q0.m1-1115<br>6.77 eV (C1)   | <br>442<br>O14Th7.q0.m1-260<br>6.77 eV (C1)   | <br>443<br>O14Th7.q0.m1-916<br>6.78 eV (C1)    | <br>444<br>O14Th7.q0.m1-688<br>6.81 eV (C1)   |
| <br>445<br>O14Th7.q0.m1-257<br>6.83 eV (C1)    | <br>446<br>O14Th7.q0.m1-874<br>6.84 eV (C1)   | <br>447<br>O14Th7.q0.m1-128<br>6.83 eV (C1)    | <br>448<br>O14Th7.q0.m1-61<br>6.87 eV (C1)    | <br>449<br>O14Th7.q0.m1-827<br>6.90 eV (C1)    | <br>450<br>O14Th7.q0.m1-633<br>6.90 eV (C1)   |
| <br>451<br>O14Th7.q0.m1-346<br>6.93 eV (C1)  | <br>452<br>O14Th7.q0.m1-501<br>6.90 eV (C1) | <br>453<br>O14Th7.q0.m1-1157<br>6.91 eV (C1) | <br>454<br>O14Th7.q0.m1-743<br>6.94 eV (C1) | <br>455<br>O14Th7.q0.m1-1164<br>6.91 eV (C1) | <br>456<br>O14Th7.q0.m1-324<br>6.95 eV (C1) |
| <br>457<br>O14Th7.q0.m1-189<br>6.96 eV (C1)  | <br>458<br>O14Th7.q0.m1-104<br>6.98 eV (C1) | <br>459<br>O14Th7.q0.m1-644<br>6.98 eV (C1)  | <br>460<br>O14Th7.q0.m1-913<br>6.99 eV (C1) | <br>461<br>O14Th7.q0.m1-219<br>6.97 eV (C1)  | <br>462<br>O14Th7.q0.m1-237<br>6.98 eV (C1) |
| <br>463<br>O14Th7.q0.m1-1155<br>7.00 eV (CS) | <br>464<br>O14Th7.q0.m1-304<br>7.01 eV (C1) | <br>465<br>O14Th7.q0.m1-193<br>7.01 eV (C1)  | <br>466<br>O14Th7.q0.m1-90<br>7.05 eV (C1)  | <br>467<br>O14Th7.q0.m1-367<br>7.07 eV (C1)  | <br>468<br>O14Th7.q0.m1-572<br>7.12 eV (C1) |

| Th <sub>7</sub> O <sub>14</sub> (Continued from previous page)                                                                  |                                                                                                                                |                                                                                                                                 |                                                                                                                                |                                                                                                                                  |                                                                                                                                   |
|---------------------------------------------------------------------------------------------------------------------------------|--------------------------------------------------------------------------------------------------------------------------------|---------------------------------------------------------------------------------------------------------------------------------|--------------------------------------------------------------------------------------------------------------------------------|----------------------------------------------------------------------------------------------------------------------------------|-----------------------------------------------------------------------------------------------------------------------------------|
| <br>469<br>O14Th7.q0.m1-1067<br>7.10 eV (C1)   | <br>470<br>O14Th7.q0.m1-406<br>7.11 eV (C1)   | <br>471<br>O14Th7.q0.m1-60<br>7.11 eV (C1)     | <br>472<br>O14Th7.q0.m1-468<br>7.13 eV (C1)   | <br>473<br>O14Th7.q0.m1-46<br>7.14 eV (C1)    | <br>474<br>O14Th7.q0.m1-1163<br>7.11 eV (C1)   |
| <br>475<br>O14Th7.q0.m1-515<br>7.15 eV (C1)    | <br>476<br>O14Th7.q0.m1-724<br>7.16 eV (C1)   | <br>477<br>O14Th7.q0.m1-500<br>7.15 eV (C1)    | <br>478<br>O14Th7.q0.m1-371<br>7.18 eV (C1)   | <br>479<br>O14Th7.q0.m1-906<br>7.18 eV (C1)   | <br>480<br>O14Th7.q0.m1-718<br>7.19 eV (C1)    |
| <br>481<br>O14Th7.q0.m1-1118<br>7.22 eV (C1)   | <br>482<br>O14Th7.q0.m1-456<br>7.22 eV (C1)   | <br>483<br>O14Th7.q0.m1-423<br>7.25 eV (C1)    | <br>484<br>O14Th7.q0.m1-904<br>7.23 eV (C1)   | <br>485<br>O14Th7.q0.m1-698<br>7.28 eV (C1)   | <br>486<br>O14Th7.q0.m1-1049<br>7.27 eV (C1)   |
| <br>487<br>O14Th7.q0.m1-1154<br>7.27 eV (C1) | <br>488<br>O14Th7.q0.m1-188<br>7.33 eV (C1) | <br>489<br>O14Th7.q0.m1-1089<br>7.34 eV (C1) | <br>490<br>O14Th7.q0.m1-826<br>7.30 eV (C1) | <br>491<br>O14Th7.q0.m1-862<br>7.32 eV (C1) | <br>492<br>O14Th7.q0.m1-1162<br>7.35 eV (C1) |
| <br>493<br>O14Th7.q0.m1-33<br>7.33 eV (C1)   | <br>494<br>O14Th7.q0.m1-971<br>7.36 eV (C1) | <br>495<br>O14Th7.q0.m1-941<br>7.37 eV (C1)  | <br>496<br>O14Th7.q0.m1-685<br>7.33 eV (C1) | <br>497<br>O14Th7.q0.m1-4<br>7.41 eV (C1)   | <br>498<br>O14Th7.q0.m1-767<br>7.39 eV (C1)  |
| <br>499<br>O14Th7.q0.m1-1088<br>7.41 eV (C1) | <br>500<br>O14Th7.q0.m1-927<br>7.38 eV (C1) | <br>501<br>O14Th7.q0.m1-474<br>7.39 eV (C1)  | <br>502<br>O14Th7.q0.m1-2<br>7.42 eV (C1)   | <br>503<br>O14Th7.q0.m1-1<br>7.43 eV (C1)   | <br>504<br>O14Th7.q0.m1-792<br>7.38 eV (C1)  |

| $\text{Th}_7\text{O}_{14}$ (Continued from previous page)                           |                                                                                     |                                                                                     |                                                                                     |                                                                                       |                                                                                       |
|-------------------------------------------------------------------------------------|-------------------------------------------------------------------------------------|-------------------------------------------------------------------------------------|-------------------------------------------------------------------------------------|---------------------------------------------------------------------------------------|---------------------------------------------------------------------------------------|
| 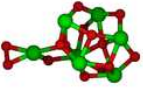   |    |    |    |    |    |
| 505<br>O14Th7.q0.m1-898<br>7.41 eV (C1)                                             | 506<br>O14Th7.q0.m1-137<br>7.42 eV (C1)                                             | 507<br>O14Th7.q0.m1-103<br>7.43 eV (C1)                                             | 508<br>O14Th7.q0.m1-191<br>7.47 eV (C1)                                             | 509<br>O14Th7.q0.m1-914<br>7.47 eV (C1)                                               | 510<br>O14Th7.q0.m1-673<br>7.52 eV (C1)                                               |
|    |    |    |    |    |    |
| 511<br>O14Th7.q0.m1-789<br>7.49 eV (C1)                                             | 512<br>O14Th7.q0.m1-225<br>7.48 eV (C1)                                             | 513<br>O14Th7.q0.m1-218<br>7.48 eV (C1)                                             | 514<br>O14Th7.q0.m1-109<br>7.52 eV (C1)                                             | 515<br>O14Th7.q0.m1-414<br>7.53 eV (C1)                                               | 516<br>O14Th7.q0.m1-1098<br>7.53 eV (C1)                                              |
|    |    |    |    |    |    |
| 517<br>O14Th7.q0.m1-251<br>7.53 eV (C1)                                             | 518<br>O14Th7.q0.m1-101<br>7.58 eV (C1)                                             | 519<br>O14Th7.q0.m1-542<br>7.57 eV (C1)                                             | 520<br>O14Th7.q0.m1-788<br>7.56 eV (C1)                                             | 521<br>O14Th7.q0.m1-872<br>7.62 eV (C1)                                               | 522<br>O14Th7.q0.m1-1128<br>7.62 eV (C1)                                              |
|  |  |  |  |  |  |
| 523<br>O14Th7.q0.m1-213<br>7.59 eV (C1)                                             | 524<br>O14Th7.q0.m1-790<br>7.63 eV (C1)                                             | 525<br>O14Th7.q0.m1-492<br>7.65 eV (C1)                                             | 526<br>O14Th7.q0.m1-79<br>7.66 eV (C1)                                              | 527<br>O14Th7.q0.m1-462<br>7.64 eV (C1)                                               | 528<br>O14Th7.q0.m1-1147<br>7.65 eV (C1)                                              |
|  |  |  |  |  |  |
| 529<br>O14Th7.q0.m1-140<br>7.69 eV (C1)                                             | 530<br>O14Th7.q0.m1-325<br>7.69 eV (C1)                                             | 531<br>O14Th7.q0.m1-598<br>7.68 eV (C1)                                             | 532<br>O14Th7.q0.m1-802<br>7.69 eV (C1)                                             | 533<br>O14Th7.q0.m1-197<br>7.71 eV (C1)                                               | 534<br>O14Th7.q0.m1-607<br>7.72 eV (C1)                                               |
|  |  |  |  |  |  |
| 535<br>O14Th7.q0.m1-129<br>7.74 eV (C1)                                             | 536<br>O14Th7.q0.m1-1071<br>7.79 eV (C1)                                            | 537<br>O14Th7.q0.m1-1070<br>7.80 eV (C1)                                            | 538<br>O14Th7.q0.m1-1047<br>7.79 eV (C1)                                            | 539<br>O14Th7.q0.m1-592<br>7.78 eV (C1)                                               | 540<br>O14Th7.q0.m1-770<br>7.79 eV (C1)                                               |

| Th <sub>7</sub> O <sub>14</sub> (Continued from previous page)                                                                  |                                                                                                                                |                                                                                                                                |                                                                                                                                 |                                                                                                                                   |                                                                                                                                   |
|---------------------------------------------------------------------------------------------------------------------------------|--------------------------------------------------------------------------------------------------------------------------------|--------------------------------------------------------------------------------------------------------------------------------|---------------------------------------------------------------------------------------------------------------------------------|-----------------------------------------------------------------------------------------------------------------------------------|-----------------------------------------------------------------------------------------------------------------------------------|
| <br>541<br>O14Th7.q0.m1-1124<br>7.81 eV (C1)   | <br>542<br>O14Th7.q0.m1-513<br>7.81 eV (C1)   | <br>543<br>O14Th7.q0.m1-536<br>7.83 eV (C1)   | <br>544<br>O14Th7.q0.m1-746<br>7.85 eV (C1)    | <br>545<br>O14Th7.q0.m1-28<br>7.84 eV (C1)     | <br>546<br>O14Th7.q0.m1-703<br>7.86 eV (C1)    |
| <br>547<br>O14Th7.q0.m1-983<br>7.84 eV (C1)    | <br>548<br>O14Th7.q0.m1-585<br>7.86 eV (C1)   | <br>549<br>O14Th7.q0.m1-861<br>7.87 eV (C1)   | <br>550<br>O14Th7.q0.m1-158<br>7.90 eV (C1)    | <br>551<br>O14Th7.q0.m1-1107<br>7.86 eV (C1)   | <br>552<br>O14Th7.q0.m1-1166<br>7.90 eV (C1)   |
| <br>553<br>O14Th7.q0.m1-1069<br>7.95 eV (C1)  | <br>554<br>O14Th7.q0.m1-358<br>7.93 eV (C1)  | <br>555<br>O14Th7.q0.m1-793<br>7.94 eV (C1)  | <br>556<br>O14Th7.q0.m1-85<br>7.93 eV (C1)    | <br>557<br>O14Th7.q0.m1-16<br>7.93 eV (C1)    | <br>558<br>O14Th7.q0.m1-892<br>7.95 eV (C1)   |
| <br>559<br>O14Th7.q0.m1-469<br>7.96 eV (C1)  | <br>560<br>O14Th7.q0.m1-910<br>7.98 eV (C1) | <br>561<br>O14Th7.q0.m1-402<br>8.00 eV (C1) | <br>562<br>O14Th7.q0.m1-99<br>8.01 eV (C1)   | <br>563<br>O14Th7.q0.m1-165<br>8.00 eV (C1)  | <br>564<br>O14Th7.q0.m1-1007<br>8.01 eV (C1) |
| <br>565<br>O14Th7.q0.m1-1009<br>7.98 eV (C1) | <br>566<br>O14Th7.q0.m1-961<br>7.98 eV (C1) | <br>567<br>O14Th7.q0.m1-291<br>8.03 eV (C1) | <br>568<br>O14Th7.q0.m1-844<br>8.10 eV (C1)  | <br>569<br>O14Th7.q0.m1-1133<br>8.10 eV (C1) | <br>570<br>O14Th7.q0.m1-54<br>8.15 eV (C1)   |
| <br>571<br>O14Th7.q0.m1-1165<br>8.13 eV (C1) | <br>572<br>O14Th7.q0.m1-439<br>8.14 eV (C1) | <br>573<br>O14Th7.q0.m1-139<br>8.15 eV (C1) | <br>574<br>O14Th7.q0.m1-1120<br>8.15 eV (C1) | <br>575<br>O14Th7.q0.m1-1146<br>8.15 eV (C1) | <br>576<br>O14Th7.q0.m1-1081<br>8.16 eV (C1) |

| Th <sub>7</sub> O <sub>14</sub> (Continued from previous page)                                                                 |                                                                                                                                |                                                                                                                                |                                                                                                                                |                                                                                                                                  |                                                                                                                                   |
|--------------------------------------------------------------------------------------------------------------------------------|--------------------------------------------------------------------------------------------------------------------------------|--------------------------------------------------------------------------------------------------------------------------------|--------------------------------------------------------------------------------------------------------------------------------|----------------------------------------------------------------------------------------------------------------------------------|-----------------------------------------------------------------------------------------------------------------------------------|
| 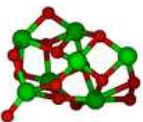<br>577<br>O14Th7.q0.m1-531<br>8.19 eV (C1)   | <br>578<br>O14Th7.q0.m1-415<br>8.17 eV (C1)   | <br>579<br>O14Th7.q0.m1-1145<br>8.15 eV (C1)  | <br>580<br>O14Th7.q0.m1-518<br>8.19 eV (C1)   | <br>581<br>O14Th7.q0.m1-111<br>8.19 eV (C1)   | <br>582<br>O14Th7.q0.m1-550<br>8.25 eV (C1)    |
| <br>583<br>O14Th7.q0.m1-930<br>8.28 eV (C1)   | <br>584<br>O14Th7.q0.m1-110<br>8.24 eV (C1)   | <br>585<br>O14Th7.q0.m1-217<br>8.26 eV (C1)   | <br>586<br>O14Th7.q0.m1-353<br>8.31 eV (C1)   | <br>587<br>O14Th7.q0.m1-429<br>8.28 eV (C1)   | <br>588<br>O14Th7.q0.m1-206<br>8.30 eV (C1)    |
| <br>589<br>O14Th7.q0.m1-1066<br>8.32 eV (C1)  | <br>590<br>O14Th7.q0.m1-653<br>8.33 eV (C1)   | <br>591<br>O14Th7.q0.m1-192<br>8.37 eV (C1)   | <br>592<br>O14Th7.q0.m1-220<br>8.31 eV (C1)   | <br>593<br>O14Th7.q0.m1-1149<br>8.34 eV (C1)  | <br>594<br>O14Th7.q0.m1-499<br>8.36 eV (C1)    |
| <br>595<br>O14Th7.q0.m1-709<br>8.40 eV (C1) | <br>596<br>O14Th7.q0.m1-168<br>8.39 eV (C1) | <br>597<br>O14Th7.q0.m1-994<br>8.37 eV (C1) | <br>598<br>O14Th7.q0.m1-640<br>8.40 eV (C1) | <br>599<br>O14Th7.q0.m1-589<br>8.46 eV (C1) | <br>600<br>O14Th7.q0.m1-198<br>8.44 eV (C1)  |
| <br>601<br>O14Th7.q0.m1-408<br>8.45 eV (C1) | <br>602<br>O14Th7.q0.m1-102<br>8.47 eV (C1) | <br>603<br>O14Th7.q0.m1-352<br>8.49 eV (C1) | <br>604<br>O14Th7.q0.m1-348<br>8.46 eV (C1) | <br>605<br>O14Th7.q0.m1-721<br>8.51 eV (C1) | <br>606<br>O14Th7.q0.m1-1105<br>8.49 eV (C1) |
| <br>607<br>O14Th7.q0.m1-430<br>8.54 eV (C1) | <br>608<br>O14Th7.q0.m1-186<br>8.54 eV (C1) | <br>609<br>O14Th7.q0.m1-620<br>8.59 eV (C1) | <br>610<br>O14Th7.q0.m1-203<br>8.56 eV (C1) | <br>611<br>O14Th7.q0.m1-438<br>8.57 eV (C1) | <br>612<br>O14Th7.q0.m1-386<br>8.61 eV (C1)  |

| $\text{Th}_7\text{O}_{14}$ (Continued from previous page)                                                                       |                                                                                                                                |                                                                                                                                |                                                                                                                                 |                                                                                                                                  |                                                                                                                                  |
|---------------------------------------------------------------------------------------------------------------------------------|--------------------------------------------------------------------------------------------------------------------------------|--------------------------------------------------------------------------------------------------------------------------------|---------------------------------------------------------------------------------------------------------------------------------|----------------------------------------------------------------------------------------------------------------------------------|----------------------------------------------------------------------------------------------------------------------------------|
| 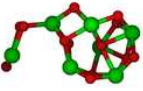<br>613<br>O14Th7.q0.m1-76<br>8.65 eV (C1)     | <br>614<br>O14Th7.q0.m1-161<br>8.65 eV (C1)   | <br>615<br>O14Th7.q0.m1-791<br>8.65 eV (C1)   | <br>616<br>O14Th7.q0.m1-1113<br>8.68 eV (C1)   | <br>617<br>O14Th7.q0.m1-736<br>8.69 eV (C1)   | <br>618<br>O14Th7.q0.m1-121<br>8.69 eV (C1)   |
| <br>619<br>O14Th7.q0.m1-1080<br>8.72 eV (C1)   | <br>620<br>O14Th7.q0.m1-313<br>8.76 eV (C1)   | <br>621<br>O14Th7.q0.m1-711<br>8.75 eV (C1)   | <br>622<br>O14Th7.q0.m1-717<br>8.75 eV (C1)    | <br>623<br>O14Th7.q0.m1-200<br>8.77 eV (C1)   | <br>624<br>O14Th7.q0.m1-1038<br>8.79 eV (C1)  |
| <br>625<br>O14Th7.q0.m1-1048<br>8.81 eV (C1)   | <br>626<br>O14Th7.q0.m1-303<br>8.84 eV (C1)   | <br>627<br>O14Th7.q0.m1-1003<br>8.92 eV (C1)  | <br>628<br>O14Th7.q0.m1-908<br>8.92 eV (C1)    | <br>629<br>O14Th7.q0.m1-1121<br>8.89 eV (C1)  | <br>630<br>O14Th7.q0.m1-493<br>8.97 eV (C1)   |
| <br>631<br>O14Th7.q0.m1-1002<br>8.93 eV (C1) | <br>632<br>O14Th7.q0.m1-433<br>8.94 eV (C1) | <br>633<br>O14Th7.q0.m1-205<br>8.95 eV (C1) | <br>634<br>O14Th7.q0.m1-1006<br>8.97 eV (C1) | <br>635<br>O14Th7.q0.m1-720<br>8.96 eV (C1) | <br>636<br>O14Th7.q0.m1-621<br>8.99 eV (C1) |
| <br>637<br>O14Th7.q0.m1-567<br>9.00 eV (C1)  | <br>638<br>O14Th7.q0.m1-630<br>9.04 eV (C1) | <br>639<br>O14Th7.q0.m1-764<br>9.04 eV (C1) | <br>640<br>O14Th7.q0.m1-172<br>9.09 eV (C1)  | <br>641<br>O14Th7.q0.m1-223<br>9.07 eV (C1) | <br>642<br>O14Th7.q0.m1-957<br>9.05 eV (C1) |
| <br>643<br>O14Th7.q0.m1-169<br>9.09 eV (C1)  | <br>644<br>O14Th7.q0.m1-945<br>9.10 eV (C1) | <br>645<br>O14Th7.q0.m1-795<br>9.10 eV (C1) | <br>646<br>O14Th7.q0.m1-928<br>9.15 eV (C1)  | <br>647<br>O14Th7.q0.m1-519<br>9.15 eV (C1) | <br>648<br>O14Th7.q0.m1-204<br>9.15 eV (C1) |

| Th <sub>7</sub> O <sub>14</sub> (Continued from previous page)                                                                 |                                                                                                                                |                                                                                                                                 |                                                                                                                                |                                                                                                                                   |                                                                                                                                   |
|--------------------------------------------------------------------------------------------------------------------------------|--------------------------------------------------------------------------------------------------------------------------------|---------------------------------------------------------------------------------------------------------------------------------|--------------------------------------------------------------------------------------------------------------------------------|-----------------------------------------------------------------------------------------------------------------------------------|-----------------------------------------------------------------------------------------------------------------------------------|
| <br>649<br>O14Th7.q0.m1-959<br>9.19 eV (C1)   | <br>650<br>O14Th7.q0.m1-305<br>9.21 eV (C1)   | <br>651<br>O14Th7.q0.m1-488<br>9.24 eV (C1)    | <br>652<br>O14Th7.q0.m1-1027<br>9.30 eV (C1)  | <br>653<br>O14Th7.q0.m1-805<br>9.27 eV (C1)    | <br>654<br>O14Th7.q0.m1-609<br>9.37 eV (C1)    |
| <br>655<br>O14Th7.q0.m1-891<br>9.35 eV (C1)   | <br>656<br>O14Th7.q0.m1-59<br>9.33 eV (C1)    | <br>657<br>O14Th7.q0.m1-939<br>9.35 eV (C1)    | <br>658<br>O14Th7.q0.m1-393<br>9.37 eV (C1)   | <br>659<br>O14Th7.q0.m1-1014<br>9.41 eV (C1)   | <br>660<br>O14Th7.q0.m1-244<br>9.40 eV (C1)    |
| <br>661<br>O14Th7.q0.m1-494<br>9.43 eV (C1)   | <br>662<br>O14Th7.q0.m1-1079<br>9.48 eV (C1)  | <br>663<br>O14Th7.q0.m1-199<br>9.52 eV (C1)    | <br>664<br>O14Th7.q0.m1-1125<br>9.57 eV (C1)  | <br>665<br>O14Th7.q0.m1-88<br>9.59 eV (C1)     | <br>666<br>O14Th7.q0.m1-312<br>9.59 eV (C1)    |
| <br>667<br>O14Th7.q0.m1-308<br>9.60 eV (C1) | <br>668<br>O14Th7.q0.m1-287<br>9.62 eV (C1) | <br>669<br>O14Th7.q0.m1-226<br>9.66 eV (C1)  | <br>670<br>O14Th7.q0.m1-357<br>9.65 eV (C1) | <br>671<br>O14Th7.q0.m1-1030<br>9.67 eV (C1) | <br>672<br>O14Th7.q0.m1-1068<br>9.67 eV (C1) |
| <br>673<br>O14Th7.q0.m1-306<br>9.64 eV (C1) | <br>674<br>O14Th7.q0.m1-331<br>9.68 eV (C1) | <br>675<br>O14Th7.q0.m1-1032<br>9.69 eV (C1) | <br>676<br>O14Th7.q0.m1-201<br>9.68 eV (C1) | <br>677<br>O14Th7.q0.m1-385<br>9.68 eV (C1)  | <br>678<br>O14Th7.q0.m1-407<br>9.69 eV (C1)  |
| <br>679<br>O14Th7.q0.m1-629<br>9.71 eV (C1) | <br>680<br>O14Th7.q0.m1-549<br>9.74 eV (C1) | <br>681<br>O14Th7.q0.m1-292<br>9.75 eV (C1)  | <br>682<br>O14Th7.q0.m1-940<br>9.71 eV (C1) | <br>683<br>O14Th7.q0.m1-1011<br>9.73 eV (C1) | <br>684<br>O14Th7.q0.m1-283<br>9.79 eV (C1)  |

| $\text{Th}_7\text{O}_{14}$ (Continued from previous page)                                                                     |                                                                                                                               |                                                                                                                               |                                                                                                                               |                                                                                                                                  |                                                                                                                                  |
|-------------------------------------------------------------------------------------------------------------------------------|-------------------------------------------------------------------------------------------------------------------------------|-------------------------------------------------------------------------------------------------------------------------------|-------------------------------------------------------------------------------------------------------------------------------|----------------------------------------------------------------------------------------------------------------------------------|----------------------------------------------------------------------------------------------------------------------------------|
| 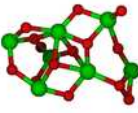<br>685<br>O14Th7.q0.m1-403<br>9.78 eV (C1)  | <br>686<br>O14Th7.q0.m1-1119<br>9.83 eV (C1) | <br>687<br>O14Th7.q0.m1-239<br>9.94 eV (C1)  | <br>688<br>O14Th7.q0.m1-20<br>9.95 eV (C1)   | <br>689<br>O14Th7.q0.m1-1148<br>10.00 eV (C1) | <br>690<br>O14Th7.q0.m1-1010<br>10.06 eV (C1) |
| <br>691<br>O14Th7.q0.m1-86<br>10.19 eV (C1)  | <br>692<br>O14Th7.q0.m1-455<br>10.21 eV (C1) | <br>693<br>O14Th7.q0.m1-794<br>10.32 eV (C1) | <br>694<br>O14Th7.q0.m1-477<br>10.42 eV (C1) | <br>695<br>O14Th7.q0.m1-365<br>10.59 eV (C1)  | <br>696<br>O14Th7.q0.m1-133<br>10.82 eV (C1)  |
| <br>697<br>O14Th7.q0.m1-404<br>10.94 eV (C1) | <br>698<br>O14Th7.q0.m1-108<br>11.01 eV (C1) | <br>699<br>O14Th7.q0.m1-495<br>11.09 eV (C1) | <br>700<br>O14Th7.q0.m1-87<br>11.09 eV (C1)  | <br>701<br>O14Th7.q0.m1-659<br>11.34 eV (C1)  |                                                                                                                                  |

| Th <sub>8</sub> O <sub>16</sub>                                                     |                                                                                     |                                                                                     |                                                                                     |                                                                                       |                                                                                       |
|-------------------------------------------------------------------------------------|-------------------------------------------------------------------------------------|-------------------------------------------------------------------------------------|-------------------------------------------------------------------------------------|---------------------------------------------------------------------------------------|---------------------------------------------------------------------------------------|
| 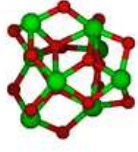   |    |    |    |    |    |
| 1<br>O16Th8.q0.m1-174<br>0.00 eV (CS)                                               | 2<br>O16Th8.q0.m1-18<br>0.48 eV (C1)                                                | 3<br>O16Th8.q0.m1-830<br>0.50 eV (C1)                                               | 4<br>O16Th8.q0.m1-691<br>0.52 eV (C1)                                               | 5<br>O16Th8.q0.m1-282<br>0.55 eV (C1)                                                 | 6<br>O16Th8.q0.m1-396<br>0.53 eV (C1)                                                 |
|    |    |    |    |    |    |
| 7<br>O16Th8.q0.m1-77<br>0.54 eV (C1)                                                | 8<br>O16Th8.q0.m1-144<br>0.55 eV (C1)                                               | 9<br>O16Th8.q0.m1-193<br>0.56 eV (C1)                                               | 10<br>O16Th8.q0.m1-217<br>0.60 eV (C1)                                              | 11<br>O16Th8.q0.m1-738<br>0.77 eV (C1)                                                | 12<br>O16Th8.q0.m1-469<br>0.77 eV (C1)                                                |
|    |    |    |    |    |    |
| 13<br>O16Th8.q0.m1-209<br>0.77 eV (C1)                                              | 14<br>O16Th8.q0.m1-753<br>0.81 eV (C1)                                              | 15<br>O16Th8.q0.m1-727<br>0.83 eV (C1)                                              | 16<br>O16Th8.q0.m1-380<br>0.86 eV (C1)                                              | 17<br>O16Th8.q0.m1-514<br>0.87 eV (C1)                                                | 18<br>O16Th8.q0.m1-823<br>0.88 eV (C1)                                                |
|  |  |  |  |  |  |
| 19<br>O16Th8.q0.m1-515<br>0.89 eV (C1)                                              | 20<br>O16Th8.q0.m1-100<br>0.90 eV (C1)                                              | 21<br>O16Th8.q0.m1-732<br>0.99 eV (C1)                                              | 22<br>O16Th8.q0.m1-189<br>1.01 eV (C1)                                              | 23<br>O16Th8.q0.m1-185<br>1.03 eV (C1)                                                | 24<br>O16Th8.q0.m1-696<br>1.04 eV (C1)                                                |
|  |  |  |  |  |  |
| 25<br>O16Th8.q0.m1-252<br>1.07 eV (C1)                                              | 26<br>O16Th8.q0.m1-74<br>1.08 eV (C1)                                               | 27<br>O16Th8.q0.m1-6<br>1.11 eV (C1)                                                | 28<br>O16Th8.q0.m1-851<br>1.10 eV (C1)                                              | 29<br>O16Th8.q0.m1-526<br>1.12 eV (C1)                                                | 30<br>O16Th8.q0.m1-202<br>1.14 eV (C1)                                                |
|  |  |  |  |  |  |
| 31<br>O16Th8.q0.m1-468<br>1.19 eV (C1)                                              | 32<br>O16Th8.q0.m1-12<br>1.19 eV (C1)                                               | 33<br>O16Th8.q0.m1-120<br>1.24 eV (C1)                                              | 34<br>O16Th8.q0.m1-424<br>1.24 eV (C1)                                              | 35<br>O16Th8.q0.m1-633<br>1.27 eV (C1)                                                | 36<br>O16Th8.q0.m1-556<br>1.26 eV (C1)                                                |

| $\text{Th}_8\text{O}_{16}$ (Continued from previous page)                                                                     |                                                                                                                               |                                                                                                                               |                                                                                                                               |                                                                                                                                 |                                                                                                                                 |
|-------------------------------------------------------------------------------------------------------------------------------|-------------------------------------------------------------------------------------------------------------------------------|-------------------------------------------------------------------------------------------------------------------------------|-------------------------------------------------------------------------------------------------------------------------------|---------------------------------------------------------------------------------------------------------------------------------|---------------------------------------------------------------------------------------------------------------------------------|
| 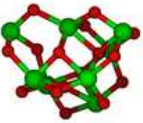<br>37<br>O16Th8.q0.m1-701<br>1.26 eV (C1)   | <br>38<br>O16Th8.q0.m1-143<br>1.26 eV (C1)   | <br>39<br>O16Th8.q0.m1-220<br>1.28 eV (C1)   | <br>40<br>O16Th8.q0.m1-177<br>1.29 eV (C1)   | <br>41<br>O16Th8.q0.m1-151<br>1.28 eV (C1)   | <br>42<br>O16Th8.q0.m1-134<br>1.28 eV (C1)   |
| <br>43<br>O16Th8.q0.m1-270<br>1.28 eV (C1)   | <br>44<br>O16Th8.q0.m1-126<br>1.31 eV (C1)   | <br>45<br>O16Th8.q0.m1-35<br>1.30 eV (C1)    | <br>46<br>O16Th8.q0.m1-171<br>1.33 eV (C1)   | <br>47<br>O16Th8.q0.m1-386<br>1.39 eV (C1)   | <br>48<br>O16Th8.q0.m1-688<br>1.39 eV (C1)   |
| <br>49<br>O16Th8.q0.m1-376<br>1.38 eV (C1)   | <br>50<br>O16Th8.q0.m1-142<br>1.39 eV (C1)   | <br>51<br>O16Th8.q0.m1-700<br>1.40 eV (C1)   | <br>52<br>O16Th8.q0.m1-39<br>1.41 eV (C1)    | <br>53<br>O16Th8.q0.m1-38<br>1.41 eV (C1)    | <br>54<br>O16Th8.q0.m1-353<br>1.41 eV (C1)   |
| <br>55<br>O16Th8.q0.m1-374<br>1.42 eV (C1) | <br>56<br>O16Th8.q0.m1-24<br>1.46 eV (C1)  | <br>57<br>O16Th8.q0.m1-581<br>1.45 eV (C1) | <br>58<br>O16Th8.q0.m1-292<br>1.48 eV (C1) | <br>59<br>O16Th8.q0.m1-355<br>1.48 eV (C1) | <br>60<br>O16Th8.q0.m1-114<br>1.48 eV (C1) |
| <br>61<br>O16Th8.q0.m1-743<br>1.51 eV (C1) | <br>62<br>O16Th8.q0.m1-212<br>1.50 eV (C1) | <br>63<br>O16Th8.q0.m1-560<br>1.53 eV (C1) | <br>64<br>O16Th8.q0.m1-548<br>1.55 eV (C1) | <br>65<br>O16Th8.q0.m1-782<br>1.55 eV (C1) | <br>66<br>O16Th8.q0.m1-641<br>1.58 eV (C1) |
| <br>67<br>O16Th8.q0.m1-269<br>1.60 eV (C1) | <br>68<br>O16Th8.q0.m1-834<br>1.60 eV (C1) | <br>69<br>O16Th8.q0.m1-237<br>1.62 eV (C1) | <br>70<br>O16Th8.q0.m1-31<br>1.64 eV (C1)  | <br>71<br>O16Th8.q0.m1-838<br>1.62 eV (C1) | <br>72<br>O16Th8.q0.m1-281<br>1.62 eV (C1) |

| Th <sub>8</sub> O <sub>16</sub> (Continued from previous page)                                                                 |                                                                                                                                |                                                                                                                                |                                                                                                                                |                                                                                                                                  |                                                                                                                                  |
|--------------------------------------------------------------------------------------------------------------------------------|--------------------------------------------------------------------------------------------------------------------------------|--------------------------------------------------------------------------------------------------------------------------------|--------------------------------------------------------------------------------------------------------------------------------|----------------------------------------------------------------------------------------------------------------------------------|----------------------------------------------------------------------------------------------------------------------------------|
| 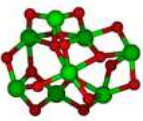<br>73<br>O16Th8.q0.m1-377<br>1.63 eV (C1)    | <br>74<br>O16Th8.q0.m1-245<br>1.63 eV (C1)    | <br>75<br>O16Th8.q0.m1-378<br>1.62 eV (C1)    | <br>76<br>O16Th8.q0.m1-287<br>1.65 eV (C1)    | <br>77<br>O16Th8.q0.m1-366<br>1.66 eV (C1)    | <br>78<br>O16Th8.q0.m1-812<br>1.63 eV (C1)    |
| <br>79<br>O16Th8.q0.m1-453<br>1.65 eV (C1)    | <br>80<br>O16Th8.q0.m1-429<br>1.70 eV (C1)    | <br>81<br>O16Th8.q0.m1-238<br>1.70 eV (C1)    | <br>82<br>O16Th8.q0.m1-803<br>1.71 eV (C1)    | <br>83<br>O16Th8.q0.m1-272<br>1.71 eV (C1)    | <br>84<br>O16Th8.q0.m1-87<br>1.72 eV (C1)     |
| <br>85<br>O16Th8.q0.m1-628<br>1.73 eV (C1)    | <br>86<br>O16Th8.q0.m1-427<br>1.74 eV (C1)    | <br>87<br>O16Th8.q0.m1-7<br>1.76 eV (C1)      | <br>88<br>O16Th8.q0.m1-655<br>1.79 eV (C1)    | <br>89<br>O16Th8.q0.m1-14<br>1.79 eV (C1)     | <br>90<br>O16Th8.q0.m1-199<br>1.81 eV (C1)    |
| <br>91<br>O16Th8.q0.m1-653<br>1.80 eV (C1)  | <br>92<br>O16Th8.q0.m1-271<br>1.80 eV (C1)  | <br>93<br>O16Th8.q0.m1-89<br>1.82 eV (C1)   | <br>94<br>O16Th8.q0.m1-707<br>1.81 eV (C1)  | <br>95<br>O16Th8.q0.m1-153<br>1.79 eV (C1)  | <br>96<br>O16Th8.q0.m1-56<br>1.85 eV (C1)   |
| <br>97<br>O16Th8.q0.m1-288<br>1.86 eV (C1)  | <br>98<br>O16Th8.q0.m1-832<br>1.86 eV (C1)  | <br>99<br>O16Th8.q0.m1-367<br>1.85 eV (C1)  | <br>100<br>O16Th8.q0.m1-1<br>1.85 eV (C1)   | <br>101<br>O16Th8.q0.m1-459<br>1.87 eV (C1) | <br>102<br>O16Th8.q0.m1-728<br>1.87 eV (C1) |
| <br>103<br>O16Th8.q0.m1-157<br>1.89 eV (C1) | <br>104<br>O16Th8.q0.m1-690<br>1.87 eV (C1) | <br>105<br>O16Th8.q0.m1-259<br>1.89 eV (C1) | <br>106<br>O16Th8.q0.m1-351<br>1.89 eV (C1) | <br>107<br>O16Th8.q0.m1-129<br>1.91 eV (C1) | <br>108<br>O16Th8.q0.m1-42<br>1.90 eV (C1)  |

| $\text{Th}_8\text{O}_{16}$ (Continued from previous page)                                                                      |                                                                                                                                |                                                                                                                                |                                                                                                                                |                                                                                                                                  |                                                                                                                                  |
|--------------------------------------------------------------------------------------------------------------------------------|--------------------------------------------------------------------------------------------------------------------------------|--------------------------------------------------------------------------------------------------------------------------------|--------------------------------------------------------------------------------------------------------------------------------|----------------------------------------------------------------------------------------------------------------------------------|----------------------------------------------------------------------------------------------------------------------------------|
| 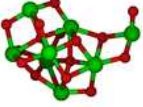<br>109<br>O16Th8.q0.m1-717<br>1.91 eV (C1)   | <br>110<br>O16Th8.q0.m1-125<br>1.92 eV (C1)   | <br>111<br>O16Th8.q0.m1-300<br>1.92 eV (C1)   | <br>112<br>O16Th8.q0.m1-817<br>1.94 eV (C1)   | <br>113<br>O16Th8.q0.m1-415<br>1.93 eV (C1)   | <br>114<br>O16Th8.q0.m1-467<br>1.96 eV (C1)   |
| <br>115<br>O16Th8.q0.m1-774<br>1.94 eV (C1)   | <br>116<br>O16Th8.q0.m1-423<br>1.95 eV (C1)   | <br>117<br>O16Th8.q0.m1-516<br>1.95 eV (C1)   | <br>118<br>O16Th8.q0.m1-491<br>1.95 eV (C1)   | <br>119<br>O16Th8.q0.m1-195<br>1.96 eV (C1)   | <br>120<br>O16Th8.q0.m1-219<br>1.95 eV (C1)   |
| <br>121<br>O16Th8.q0.m1-504<br>1.98 eV (C1)   | <br>122<br>O16Th8.q0.m1-585<br>1.97 eV (C1)   | <br>123<br>O16Th8.q0.m1-670<br>1.97 eV (C1)   | <br>124<br>O16Th8.q0.m1-159<br>1.98 eV (C1)   | <br>125<br>O16Th8.q0.m1-403<br>1.96 eV (C1)   | <br>126<br>O16Th8.q0.m1-278<br>1.97 eV (C1)   |
| <br>127<br>O16Th8.q0.m1-354<br>1.98 eV (C1)  | <br>128<br>O16Th8.q0.m1-772<br>2.00 eV (C1)  | <br>129<br>O16Th8.q0.m1-197<br>2.00 eV (C1)  | <br>130<br>O16Th8.q0.m1-553<br>2.00 eV (C1)  | <br>131<br>O16Th8.q0.m1-45<br>2.02 eV (C1)   | <br>132<br>O16Th8.q0.m1-135<br>2.02 eV (C1)  |
| <br>133<br>O16Th8.q0.m1-340<br>2.05 eV (C1) | <br>134<br>O16Th8.q0.m1-417<br>2.05 eV (C1) | <br>135<br>O16Th8.q0.m1-594<br>2.03 eV (C1) | <br>136<br>O16Th8.q0.m1-198<br>2.04 eV (C1) | <br>137<br>O16Th8.q0.m1-577<br>2.05 eV (C1) | <br>138<br>O16Th8.q0.m1-535<br>2.04 eV (C1) |
| <br>139<br>O16Th8.q0.m1-835<br>2.05 eV (C1) | <br>140<br>O16Th8.q0.m1-801<br>2.04 eV (C1) | <br>141<br>O16Th8.q0.m1-709<br>2.04 eV (C1) | <br>142<br>O16Th8.q0.m1-127<br>2.04 eV (C1) | <br>143<br>O16Th8.q0.m1-494<br>2.06 eV (C1) | <br>144<br>O16Th8.q0.m1-737<br>2.07 eV (C1) |

| Th <sub>8</sub> O <sub>16</sub> (Continued from previous page)                      |                                                                                     |                                                                                     |                                                                                     |                                                                                       |                                                                                       |
|-------------------------------------------------------------------------------------|-------------------------------------------------------------------------------------|-------------------------------------------------------------------------------------|-------------------------------------------------------------------------------------|---------------------------------------------------------------------------------------|---------------------------------------------------------------------------------------|
|    |    |    |    |    |    |
| 145<br>O16Th8.q0.m1-175<br>2.08 eV (C1)                                             | 146<br>O16Th8.q0.m1-564<br>2.08 eV (C1)                                             | 147<br>O16Th8.q0.m1-121<br>2.08 eV (C1)                                             | 148<br>O16Th8.q0.m1-759<br>2.08 eV (C1)                                             | 149<br>O16Th8.q0.m1-320<br>2.09 eV (C1)                                               | 150<br>O16Th8.q0.m1-133<br>2.09 eV (C1)                                               |
|    |    |    |    |    |    |
| 151<br>O16Th8.q0.m1-571<br>2.07 eV (C1)                                             | 152<br>O16Th8.q0.m1-730<br>2.11 eV (C1)                                             | 153<br>O16Th8.q0.m1-637<br>2.12 eV (C1)                                             | 154<br>O16Th8.q0.m1-356<br>2.11 eV (C1)                                             | 155<br>O16Th8.q0.m1-767<br>2.12 eV (C1)                                               | 156<br>O16Th8.q0.m1-534<br>2.14 eV (C1)                                               |
|    |    |    |    |    |    |
| 157<br>O16Th8.q0.m1-275<br>2.13 eV (C1)                                             | 158<br>O16Th8.q0.m1-226<br>2.16 eV (C1)                                             | 159<br>O16Th8.q0.m1-613<br>2.16 eV (C1)                                             | 160<br>O16Th8.q0.m1-227<br>2.15 eV (C1)                                             | 161<br>O16Th8.q0.m1-286<br>2.16 eV (C1)                                               | 162<br>O16Th8.q0.m1-592<br>2.15 eV (C1)                                               |
|  |  |  |  |  |  |
| 163<br>O16Th8.q0.m1-152<br>2.15 eV (C1)                                             | 164<br>O16Th8.q0.m1-451<br>2.15 eV (C1)                                             | 165<br>O16Th8.q0.m1-11<br>2.16 eV (C1)                                              | 166<br>O16Th8.q0.m1-714<br>2.17 eV (C1)                                             | 167<br>O16Th8.q0.m1-110<br>2.16 eV (C1)                                               | 168<br>O16Th8.q0.m1-626<br>2.15 eV (C1)                                               |
|  |  |  |  |  |  |
| 169<br>O16Th8.q0.m1-357<br>2.18 eV (C1)                                             | 170<br>O16Th8.q0.m1-76<br>2.19 eV (C1)                                              | 171<br>O16Th8.q0.m1-398<br>2.18 eV (C1)                                             | 172<br>O16Th8.q0.m1-172<br>2.18 eV (C1)                                             | 173<br>O16Th8.q0.m1-485<br>2.17 eV (C1)                                               | 174<br>O16Th8.q0.m1-699<br>2.18 eV (C1)                                               |
|  |  |  |  |  |  |
| 175<br>O16Th8.q0.m1-555<br>2.19 eV (C1)                                             | 176<br>O16Th8.q0.m1-741<br>2.20 eV (C1)                                             | 177<br>O16Th8.q0.m1-455<br>2.22 eV (C1)                                             | 178<br>O16Th8.q0.m1-317<br>2.20 eV (C1)                                             | 179<br>O16Th8.q0.m1-242<br>2.22 eV (C1)                                               | 180<br>O16Th8.q0.m1-712<br>2.21 eV (C1)                                               |

| Th <sub>8</sub> O <sub>16</sub> (Continued from previous page)                                                                 |                                                                                                                                |                                                                                                                                |                                                                                                                                |                                                                                                                                  |                                                                                                                                  |
|--------------------------------------------------------------------------------------------------------------------------------|--------------------------------------------------------------------------------------------------------------------------------|--------------------------------------------------------------------------------------------------------------------------------|--------------------------------------------------------------------------------------------------------------------------------|----------------------------------------------------------------------------------------------------------------------------------|----------------------------------------------------------------------------------------------------------------------------------|
| 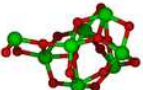<br>181<br>O16Th8.q0.m1-719<br>2.21 eV (C1)   | <br>182<br>O16Th8.q0.m1-431<br>2.22 eV (C1)   | <br>183<br>O16Th8.q0.m1-768<br>2.22 eV (C1)   | <br>184<br>O16Th8.q0.m1-710<br>2.23 eV (C1)   | <br>185<br>O16Th8.q0.m1-86<br>2.22 eV (C1)    | <br>186<br>O16Th8.q0.m1-756<br>2.23 eV (C1)   |
| <br>187<br>O16Th8.q0.m1-302<br>2.26 eV (C1)   | <br>188<br>O16Th8.q0.m1-123<br>2.23 eV (C1)   | <br>189<br>O16Th8.q0.m1-698<br>2.23 eV (C1)   | <br>190<br>O16Th8.q0.m1-785<br>2.25 eV (C1)   | <br>191<br>O16Th8.q0.m1-310<br>2.24 eV (C1)   | <br>192<br>O16Th8.q0.m1-230<br>2.24 eV (C1)   |
| <br>193<br>O16Th8.q0.m1-827<br>2.25 eV (C1)   | <br>194<br>O16Th8.q0.m1-530<br>2.23 eV (C1)   | <br>195<br>O16Th8.q0.m1-365<br>2.24 eV (C1)   | <br>196<br>O16Th8.q0.m1-150<br>2.24 eV (C1)   | <br>197<br>O16Th8.q0.m1-845<br>2.25 eV (C1)   | <br>198<br>O16Th8.q0.m1-2<br>2.25 eV (C1)     |
| <br>199<br>O16Th8.q0.m1-456<br>2.27 eV (CS)  | <br>200<br>O16Th8.q0.m1-184<br>2.26 eV (C1)  | <br>201<br>O16Th8.q0.m1-179<br>2.30 eV (C1)  | <br>202<br>O16Th8.q0.m1-729<br>2.28 eV (C1)  | <br>203<br>O16Th8.q0.m1-191<br>2.28 eV (C1)  | <br>204<br>O16Th8.q0.m1-136<br>2.28 eV (C1)  |
| <br>205<br>O16Th8.q0.m1-23<br>2.30 eV (C1)  | <br>206<br>O16Th8.q0.m1-128<br>2.29 eV (C1) | <br>207<br>O16Th8.q0.m1-783<br>2.30 eV (C1) | <br>208<br>O16Th8.q0.m1-296<br>2.30 eV (C1) | <br>209<br>O16Th8.q0.m1-164<br>2.32 eV (C1) | <br>210<br>O16Th8.q0.m1-452<br>2.30 eV (C1) |
| <br>211<br>O16Th8.q0.m1-842<br>2.31 eV (C1) | <br>212<br>O16Th8.q0.m1-418<br>2.32 eV (C1) | <br>213<br>O16Th8.q0.m1-603<br>2.33 eV (C1) | <br>214<br>O16Th8.q0.m1-201<br>2.34 eV (C1) | <br>215<br>O16Th8.q0.m1-694<br>2.35 eV (C1) | <br>216<br>O16Th8.q0.m1-401<br>2.35 eV (C1) |

| Th <sub>8</sub> O <sub>16</sub> (Continued from previous page)                                                                 |                                                                                                                                |                                                                                                                                |                                                                                                                                |                                                                                                                                  |                                                                                                                                  |
|--------------------------------------------------------------------------------------------------------------------------------|--------------------------------------------------------------------------------------------------------------------------------|--------------------------------------------------------------------------------------------------------------------------------|--------------------------------------------------------------------------------------------------------------------------------|----------------------------------------------------------------------------------------------------------------------------------|----------------------------------------------------------------------------------------------------------------------------------|
| 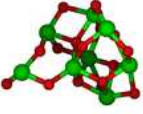<br>217<br>O16Th8.q0.m1-454<br>2.35 eV (C1)   | <br>218<br>O16Th8.q0.m1-156<br>2.36 eV (C1)   | <br>219<br>O16Th8.q0.m1-124<br>2.35 eV (C1)   | <br>220<br>O16Th8.q0.m1-81<br>2.38 eV (C1)    | <br>221<br>O16Th8.q0.m1-20<br>2.38 eV (C1)    | <br>222<br>O16Th8.q0.m1-105<br>2.39 eV (C1)   |
| <br>223<br>O16Th8.q0.m1-441<br>2.38 eV (C1)   | <br>224<br>O16Th8.q0.m1-106<br>2.39 eV (C1)   | <br>225<br>O16Th8.q0.m1-391<br>2.38 eV (C1)   | <br>226<br>O16Th8.q0.m1-203<br>2.38 eV (C1)   | <br>227<br>O16Th8.q0.m1-673<br>2.38 eV (C1)   | <br>228<br>O16Th8.q0.m1-113<br>2.39 eV (C1)   |
| <br>229<br>O16Th8.q0.m1-580<br>2.39 eV (C1)   | <br>230<br>O16Th8.q0.m1-359<br>2.39 eV (C1)   | <br>231<br>O16Th8.q0.m1-192<br>2.40 eV (C1)   | <br>232<br>O16Th8.q0.m1-520<br>2.40 eV (C1)   | <br>233<br>O16Th8.q0.m1-407<br>2.41 eV (C1)   | <br>234<br>O16Th8.q0.m1-187<br>2.40 eV (C1)   |
| <br>235<br>O16Th8.q0.m1-364<br>2.41 eV (C1) | <br>236<br>O16Th8.q0.m1-34<br>2.42 eV (C1)  | <br>237<br>O16Th8.q0.m1-395<br>2.43 eV (C1) | <br>238<br>O16Th8.q0.m1-224<br>2.44 eV (C1) | <br>239<br>O16Th8.q0.m1-305<br>2.46 eV (C1) | <br>240<br>O16Th8.q0.m1-542<br>2.44 eV (C1) |
| <br>241<br>O16Th8.q0.m1-256<br>2.47 eV (C1) | <br>242<br>O16Th8.q0.m1-27<br>2.45 eV (C1)  | <br>243<br>O16Th8.q0.m1-338<br>2.46 eV (C1) | <br>244<br>O16Th8.q0.m1-570<br>2.46 eV (C1) | <br>245<br>O16Th8.q0.m1-506<br>2.45 eV (C1) | <br>246<br>O16Th8.q0.m1-547<br>2.47 eV (C1) |
| <br>247<br>O16Th8.q0.m1-62<br>2.50 eV (C1)  | <br>248<br>O16Th8.q0.m1-725<br>2.50 eV (C1) | <br>249<br>O16Th8.q0.m1-614<br>2.55 eV (C1) | <br>250<br>O16Th8.q0.m1-283<br>2.56 eV (C1) | <br>251<br>O16Th8.q0.m1-658<br>2.57 eV (C1) | <br>252<br>O16Th8.q0.m1-26<br>2.60 eV (C1)  |

| Th <sub>8</sub> O <sub>16</sub> (Continued from previous page)                                                                 |                                                                                                                                |                                                                                                                                |                                                                                                                                |                                                                                                                                 |                                                                                                                                  |
|--------------------------------------------------------------------------------------------------------------------------------|--------------------------------------------------------------------------------------------------------------------------------|--------------------------------------------------------------------------------------------------------------------------------|--------------------------------------------------------------------------------------------------------------------------------|---------------------------------------------------------------------------------------------------------------------------------|----------------------------------------------------------------------------------------------------------------------------------|
| 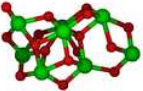<br>253<br>O16Th8.q0.m1-561<br>2.61 eV (C1)   | <br>254<br>O16Th8.q0.m1-84<br>2.63 eV (C1)    | <br>255<br>O16Th8.q0.m1-140<br>2.65 eV (C1)   | <br>256<br>O16Th8.q0.m1-802<br>2.66 eV (C1)   | <br>257<br>O16Th8.q0.m1-411<br>2.68 eV (C1)  | <br>258<br>O16Th8.q0.m1-211<br>2.71 eV (C1)   |
| <br>259<br>O16Th8.q0.m1-167<br>2.69 eV (C1)   | <br>260<br>O16Th8.q0.m1-442<br>2.74 eV (C1)   | <br>261<br>O16Th8.q0.m1-168<br>2.71 eV (C1)   | <br>262<br>O16Th8.q0.m1-249<br>2.75 eV (C1)   | <br>263<br>O16Th8.q0.m1-549<br>2.78 eV (C1)  | <br>264<br>O16Th8.q0.m1-486<br>2.83 eV (C1)   |
| <br>265<br>O16Th8.q0.m1-196<br>2.85 eV (C1)   | <br>266<br>O16Th8.q0.m1-595<br>2.83 eV (C1)   | <br>267<br>O16Th8.q0.m1-247<br>2.88 eV (C1)   | <br>268<br>O16Th8.q0.m1-421<br>2.88 eV (C1)   | <br>269<br>O16Th8.q0.m1-464<br>2.88 eV (C1)  | <br>270<br>O16Th8.q0.m1-47<br>2.92 eV (C1)    |
| <br>271<br>O16Th8.q0.m1-234<br>2.91 eV (C1) | <br>272<br>O16Th8.q0.m1-635<br>2.93 eV (C1)  | <br>273<br>O16Th8.q0.m1-70<br>2.90 eV (C1)  | <br>274<br>O16Th8.q0.m1-593<br>2.95 eV (C1) | <br>275<br>O16Th8.q0.m1-679<br>2.92 eV (C1) | <br>276<br>O16Th8.q0.m1-98<br>2.96 eV (C1)  |
| <br>277<br>O16Th8.q0.m1-465<br>2.95 eV (C1) | <br>278<br>O16Th8.q0.m1-362<br>2.97 eV (C1) | <br>279<br>O16Th8.q0.m1-563<br>3.00 eV (C1) | <br>280<br>O16Th8.q0.m1-236<br>3.00 eV (C1) | <br>281<br>O16Th8.q0.m1-22<br>3.02 eV (C1) | <br>282<br>O16Th8.q0.m1-25<br>2.98 eV (C1)  |
| <br>283<br>O16Th8.q0.m1-312<br>3.03 eV (C1) | <br>284<br>O16Th8.q0.m1-601<br>3.04 eV (C1) | <br>285<br>O16Th8.q0.m1-182<br>3.04 eV (C1) | <br>286<br>O16Th8.q0.m1-569<br>3.07 eV (C1) | <br>287<br>O16Th8.q0.m1-54<br>3.09 eV (C1) | <br>288<br>O16Th8.q0.m1-511<br>3.07 eV (C1) |

| $\text{Th}_8\text{O}_{16}$ (Continued from previous page)                                                                      |                                                                                                                                |                                                                                                                                |                                                                                                                                |                                                                                                                                  |                                                                                                                                  |
|--------------------------------------------------------------------------------------------------------------------------------|--------------------------------------------------------------------------------------------------------------------------------|--------------------------------------------------------------------------------------------------------------------------------|--------------------------------------------------------------------------------------------------------------------------------|----------------------------------------------------------------------------------------------------------------------------------|----------------------------------------------------------------------------------------------------------------------------------|
| 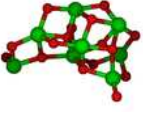<br>289<br>O16Th8.q0.m1-155<br>3.10 eV (C1)   | <br>290<br>O16Th8.q0.m1-248<br>3.10 eV (C1)   | <br>291<br>O16Th8.q0.m1-163<br>3.11 eV (C1)   | <br>292<br>O16Th8.q0.m1-210<br>3.14 eV (C1)   | <br>293<br>O16Th8.q0.m1-618<br>3.15 eV (C1)   | <br>294<br>O16Th8.q0.m1-48<br>3.16 eV (C1)    |
| <br>295<br>O16Th8.q0.m1-111<br>3.18 eV (C1)   | <br>296<br>O16Th8.q0.m1-213<br>3.20 eV (C1)   | <br>297<br>O16Th8.q0.m1-207<br>3.21 eV (C1)   | <br>298<br>O16Th8.q0.m1-495<br>3.21 eV (C1)   | <br>299<br>O16Th8.q0.m1-562<br>3.22 eV (C1)   | <br>300<br>O16Th8.q0.m1-508<br>3.19 eV (C1)   |
| <br>301<br>O16Th8.q0.m1-332<br>3.23 eV (C1)   | <br>302<br>O16Th8.q0.m1-139<br>3.25 eV (C1)   | <br>303<br>O16Th8.q0.m1-500<br>3.25 eV (C1)   | <br>304<br>O16Th8.q0.m1-323<br>3.26 eV (C1)   | <br>305<br>O16Th8.q0.m1-473<br>3.29 eV (C1)   | <br>306<br>O16Th8.q0.m1-46<br>3.30 eV (C1)    |
| <br>307<br>O16Th8.q0.m1-487<br>3.32 eV (C1) | <br>308<br>O16Th8.q0.m1-131<br>3.32 eV (C1) | <br>309<br>O16Th8.q0.m1-200<br>3.33 eV (C1) | <br>310<br>O16Th8.q0.m1-291<br>3.32 eV (C1) | <br>311<br>O16Th8.q0.m1-17<br>3.39 eV (C1)  | <br>312<br>O16Th8.q0.m1-510<br>3.36 eV (C1) |
| <br>313<br>O16Th8.q0.m1-93<br>5.85 eV (C1)  | <br>314<br>O16Th8.q0.m1-95<br>5.99 eV (C1)  | <br>315<br>O16Th8.q0.m1-588<br>6.10 eV (C1) | <br>316<br>O16Th8.q0.m1-438<br>6.13 eV (C1) | <br>317<br>O16Th8.q0.m1-416<br>6.16 eV (C1) | <br>318<br>O16Th8.q0.m1-279<br>6.27 eV (C1) |
| <br>319<br>O16Th8.q0.m1-280<br>6.38 eV (C1) | <br>320<br>O16Th8.q0.m1-194<br>6.43 eV (C1) | <br>321<br>O16Th8.q0.m1-250<br>6.43 eV (C1) | <br>322<br>O16Th8.q0.m1-529<br>6.43 eV (C1) | <br>323<br>O16Th8.q0.m1-325<br>6.44 eV (C1) | <br>324<br>O16Th8.q0.m1-154<br>6.45 eV (C1) |

| Th <sub>8</sub> O <sub>16</sub> (Continued from previous page)                      |                                                                                     |                                                                                     |                                                                                     |                                                                                       |                                                                                       |
|-------------------------------------------------------------------------------------|-------------------------------------------------------------------------------------|-------------------------------------------------------------------------------------|-------------------------------------------------------------------------------------|---------------------------------------------------------------------------------------|---------------------------------------------------------------------------------------|
| 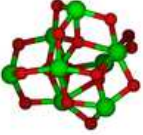   |    |    |    |    |    |
| 325<br>O16Th8.q0.m1-71<br>6.56 eV (C1)                                              | 326<br>O16Th8.q0.m1-740<br>6.63 eV (C1)                                             | 327<br>O16Th8.q0.m1-848<br>6.65 eV (C1)                                             | 328<br>O16Th8.q0.m1-382<br>6.68 eV (C1)                                             | 329<br>O16Th8.q0.m1-328<br>6.64 eV (C1)                                               | 330<br>O16Th8.q0.m1-392<br>6.69 eV (C1)                                               |
|    |    |    |    |    |    |
| 331<br>O16Th8.q0.m1-598<br>6.73 eV (C1)                                             | 332<br>O16Th8.q0.m1-265<br>6.76 eV (C1)                                             | 333<br>O16Th8.q0.m1-240<br>6.79 eV (C1)                                             | 334<br>O16Th8.q0.m1-807<br>6.77 eV (C1)                                             | 335<br>O16Th8.q0.m1-704<br>6.79 eV (C1)                                               | 336<br>O16Th8.q0.m1-303<br>6.86 eV (C1)                                               |
|    |    |    |    |    |    |
| 337<br>O16Th8.q0.m1-646<br>6.87 eV (C1)                                             | 338<br>O16Th8.q0.m1-244<br>6.86 eV (C1)                                             | 339<br>O16Th8.q0.m1-50<br>6.92 eV (C1)                                              | 340<br>O16Th8.q0.m1-604<br>6.90 eV (C1)                                             | 341<br>O16Th8.q0.m1-483<br>6.92 eV (C1)                                               | 342<br>O16Th8.q0.m1-161<br>6.95 eV (C1)                                               |
|  |  |  |  |  |  |
| 343<br>O16Th8.q0.m1-225<br>6.99 eV (C1)                                             | 344<br>O16Th8.q0.m1-559<br>7.05 eV (C1)                                             | 345<br>O16Th8.q0.m1-13<br>7.03 eV (C1)                                              | 346<br>O16Th8.q0.m1-389<br>7.01 eV (C1)                                             | 347<br>O16Th8.q0.m1-744<br>7.04 eV (C1)                                               | 348<br>O16Th8.q0.m1-692<br>7.07 eV (C1)                                               |
|  |  |  |  |  |  |
| 349<br>O16Th8.q0.m1-146<br>7.11 eV (C1)                                             | 350<br>O16Th8.q0.m1-102<br>7.12 eV (C1)                                             | 351<br>O16Th8.q0.m1-840<br>7.14 eV (C1)                                             | 352<br>O16Th8.q0.m1-221<br>7.18 eV (C1)                                             | 353<br>O16Th8.q0.m1-336<br>7.19 eV (C1)                                               | 354<br>O16Th8.q0.m1-180<br>7.17 eV (C1)                                               |
|  |  |  |  |  |  |
| 355<br>O16Th8.q0.m1-789<br>7.20 eV (C1)                                             | 356<br>O16Th8.q0.m1-589<br>7.20 eV (C1)                                             | 357<br>O16Th8.q0.m1-638<br>7.18 eV (C1)                                             | 358<br>O16Th8.q0.m1-620<br>7.23 eV (C1)                                             | 359<br>O16Th8.q0.m1-190<br>7.23 eV (C1)                                               | 360<br>O16Th8.q0.m1-505<br>7.24 eV (C1)                                               |

| Th <sub>8</sub> O <sub>16</sub> (Continued from previous page)                      |                                                                                     |                                                                                     |                                                                                     |                                                                                       |                                                                                       |
|-------------------------------------------------------------------------------------|-------------------------------------------------------------------------------------|-------------------------------------------------------------------------------------|-------------------------------------------------------------------------------------|---------------------------------------------------------------------------------------|---------------------------------------------------------------------------------------|
| 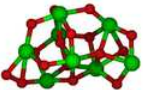   |    |    |    |    |    |
| 361<br>O16Th8.q0.m1-119<br>7.21 eV (C1)                                             | 362<br>O16Th8.q0.m1-507<br>7.27 eV (C1)                                             | 363<br>O16Th8.q0.m1-849<br>7.27 eV (C1)                                             | 364<br>O16Th8.q0.m1-642<br>7.29 eV (C1)                                             | 365<br>O16Th8.q0.m1-223<br>7.31 eV (C1)                                               | 366<br>O16Th8.q0.m1-170<br>7.33 eV (C1)                                               |
|    |    |    |    |    |    |
| 367<br>O16Th8.q0.m1-533<br>7.32 eV (C1)                                             | 368<br>O16Th8.q0.m1-749<br>7.32 eV (C1)                                             | 369<br>O16Th8.q0.m1-439<br>7.35 eV (C1)                                             | 370<br>O16Th8.q0.m1-253<br>7.35 eV (C1)                                             | 371<br>O16Th8.q0.m1-477<br>7.36 eV (C1)                                               | 372<br>O16Th8.q0.m1-103<br>7.39 eV (C1)                                               |
|    |    |    |    |    |    |
| 373<br>O16Th8.q0.m1-503<br>7.41 eV (C1)                                             | 374<br>O16Th8.q0.m1-262<br>7.41 eV (C1)                                             | 375<br>O16Th8.q0.m1-384<br>7.40 eV (C1)                                             | 376<br>O16Th8.q0.m1-773<br>7.44 eV (C1)                                             | 377<br>O16Th8.q0.m1-640<br>7.42 eV (C1)                                               | 378<br>O16Th8.q0.m1-319<br>7.43 eV (C1)                                               |
|  |  |  |  |  |  |
| 379<br>O16Th8.q0.m1-748<br>7.44 eV (C1)                                             | 380<br>O16Th8.q0.m1-501<br>7.46 eV (C1)                                             | 381<br>O16Th8.q0.m1-847<br>7.50 eV (C1)                                             | 382<br>O16Th8.q0.m1-437<br>7.49 eV (C1)                                             | 383<br>O16Th8.q0.m1-145<br>7.54 eV (C1)                                               | 384<br>O16Th8.q0.m1-405<br>7.55 eV (C1)                                               |
|  |  |  |  |  |  |
| 385<br>O16Th8.q0.m1-770<br>7.57 eV (C1)                                             | 386<br>O16Th8.q0.m1-137<br>7.55 eV (C1)                                             | 387<br>O16Th8.q0.m1-118<br>7.59 eV (C1)                                             | 388<br>O16Th8.q0.m1-373<br>7.60 eV (C1)                                             | 389<br>O16Th8.q0.m1-488<br>7.60 eV (C1)                                               | 390<br>O16Th8.q0.m1-92<br>7.63 eV (C1)                                                |
|  |  |  |  |  |  |
| 391<br>O16Th8.q0.m1-574<br>7.63 eV (C1)                                             | 392<br>O16Th8.q0.m1-263<br>7.63 eV (C1)                                             | 393<br>O16Th8.q0.m1-204<br>7.65 eV (C1)                                             | 394<br>O16Th8.q0.m1-315<br>7.67 eV (C1)                                             | 395<br>O16Th8.q0.m1-736<br>7.68 eV (C1)                                               | 396<br>O16Th8.q0.m1-706<br>7.65 eV (C1)                                               |

| Th <sub>8</sub> O <sub>16</sub> (Continued from previous page)                      |                                                                                     |                                                                                     |                                                                                     |                                                                                       |                                                                                       |
|-------------------------------------------------------------------------------------|-------------------------------------------------------------------------------------|-------------------------------------------------------------------------------------|-------------------------------------------------------------------------------------|---------------------------------------------------------------------------------------|---------------------------------------------------------------------------------------|
|    |    |    |    |    |    |
| 397<br>O16Th8.q0.m1-724<br>7.71 eV (C1)                                             | 398<br>O16Th8.q0.m1-261<br>7.74 eV (C1)                                             | 399<br>O16Th8.q0.m1-166<br>7.73 eV (C1)                                             | 400<br>O16Th8.q0.m1-222<br>7.78 eV (C1)                                             | 401<br>O16Th8.q0.m1-96<br>7.80 eV (C1)                                                | 402<br>O16Th8.q0.m1-257<br>7.82 eV (C1)                                               |
|    |    |    |    |    |    |
| 403<br>O16Th8.q0.m1-790<br>7.82 eV (C1)                                             | 404<br>O16Th8.q0.m1-844<br>7.84 eV (C1)                                             | 405<br>O16Th8.q0.m1-627<br>7.84 eV (C1)                                             | 406<br>O16Th8.q0.m1-512<br>7.86 eV (C1)                                             | 407<br>O16Th8.q0.m1-324<br>7.86 eV (C1)                                               | 408<br>O16Th8.q0.m1-388<br>7.85 eV (C1)                                               |
|    |    |    |    |    |    |
| 409<br>O16Th8.q0.m1-214<br>7.85 eV (C1)                                             | 410<br>O16Th8.q0.m1-532<br>7.86 eV (C1)                                             | 411<br>O16Th8.q0.m1-684<br>7.87 eV (C1)                                             | 412<br>O16Th8.q0.m1-841<br>7.88 eV (C1)                                             | 413<br>O16Th8.q0.m1-573<br>7.85 eV (C1)                                               | 414<br>O16Th8.q0.m1-557<br>7.89 eV (C1)                                               |
|  |  |  |  |  |  |
| 415<br>O16Th8.q0.m1-322<br>7.88 eV (C1)                                             | 416<br>O16Th8.q0.m1-687<br>7.91 eV (C1)                                             | 417<br>O16Th8.q0.m1-695<br>7.94 eV (C1)                                             | 418<br>O16Th8.q0.m1-747<br>7.93 eV (C1)                                             | 419<br>O16Th8.q0.m1-368<br>7.93 eV (C1)                                               | 420<br>O16Th8.q0.m1-761<br>7.96 eV (C1)                                               |
|  |  |  |  |  |  |
| 421<br>O16Th8.q0.m1-686<br>7.95 eV (C1)                                             | 422<br>O16Th8.q0.m1-677<br>7.95 eV (C1)                                             | 423<br>O16Th8.q0.m1-316<br>7.95 eV (C1)                                             | 424<br>O16Th8.q0.m1-341<br>7.95 eV (C1)                                             | 425<br>O16Th8.q0.m1-295<br>7.96 eV (C1)                                               | 426<br>O16Th8.q0.m1-186<br>7.98 eV (C1)                                               |
|  |  |  |  |  |  |
| 427<br>O16Th8.q0.m1-644<br>7.97 eV (C1)                                             | 428<br>O16Th8.q0.m1-794<br>7.99 eV (C1)                                             | 429<br>O16Th8.q0.m1-130<br>7.99 eV (C1)                                             | 430<br>O16Th8.q0.m1-264<br>7.99 eV (C1)                                             | 431<br>O16Th8.q0.m1-387<br>8.02 eV (C1)                                               | 432<br>O16Th8.q0.m1-705<br>8.01 eV (C1)                                               |

| Th <sub>8</sub> O <sub>16</sub> (Continued from previous page)                      |                                                                                     |                                                                                     |                                                                                     |                                                                                       |                                                                                       |
|-------------------------------------------------------------------------------------|-------------------------------------------------------------------------------------|-------------------------------------------------------------------------------------|-------------------------------------------------------------------------------------|---------------------------------------------------------------------------------------|---------------------------------------------------------------------------------------|
| 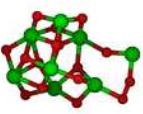   |    |    |    |    |    |
| 433<br>O16Th8.q0.m1-132<br>8.05 eV (C1)                                             | 434<br>O16Th8.q0.m1-393<br>8.03 eV (C1)                                             | 435<br>O16Th8.q0.m1-608<br>8.07 eV (C1)                                             | 436<br>O16Th8.q0.m1-147<br>8.04 eV (C1)                                             | 437<br>O16Th8.q0.m1-372<br>8.03 eV (C1)                                               | 438<br>O16Th8.q0.m1-361<br>8.07 eV (C1)                                               |
|    |    |    |    |    |    |
| 439<br>O16Th8.q0.m1-685<br>8.08 eV (C1)                                             | 440<br>O16Th8.q0.m1-447<br>8.05 eV (C1)                                             | 441<br>O16Th8.q0.m1-697<br>8.10 eV (C1)                                             | 442<br>O16Th8.q0.m1-181<br>8.11 eV (C1)                                             | 443<br>O16Th8.q0.m1-349<br>8.11 eV (C1)                                               | 444<br>O16Th8.q0.m1-639<br>8.08 eV (C1)                                               |
|    |    |    |    |    |    |
| 445<br>O16Th8.q0.m1-776<br>8.13 eV (C1)                                             | 446<br>O16Th8.q0.m1-850<br>8.13 eV (C1)                                             | 447<br>O16Th8.q0.m1-254<br>8.12 eV (C1)                                             | 448<br>O16Th8.q0.m1-309<br>8.14 eV (C1)                                             | 449<br>O16Th8.q0.m1-587<br>8.13 eV (C1)                                               | 450<br>O16Th8.q0.m1-474<br>8.16 eV (C1)                                               |
|  |  |  |  |  |  |
| 451<br>O16Th8.q0.m1-138<br>8.16 eV (C1)                                             | 452<br>O16Th8.q0.m1-360<br>8.18 eV (C1)                                             | 453<br>O16Th8.q0.m1-762<br>8.22 eV (C1)                                             | 454<br>O16Th8.q0.m1-414<br>8.23 eV (C1)                                             | 455<br>O16Th8.q0.m1-449<br>8.24 eV (C1)                                               | 456<br>O16Th8.q0.m1-112<br>8.24 eV (C1)                                               |
|  |  |  |  |  |  |
| 457<br>O16Th8.q0.m1-293<br>8.26 eV (C1)                                             | 458<br>O16Th8.q0.m1-567<br>8.20 eV (C1)                                             | 459<br>O16Th8.q0.m1-636<br>8.29 eV (C1)                                             | 460<br>O16Th8.q0.m1-73<br>8.27 eV (C1)                                              | 461<br>O16Th8.q0.m1-621<br>8.32 eV (C1)                                               | 462<br>O16Th8.q0.m1-290<br>8.32 eV (C1)                                               |
|  |  |  |  |  |  |
| 463<br>O16Th8.q0.m1-436<br>8.32 eV (C1)                                             | 464<br>O16Th8.q0.m1-232<br>8.34 eV (C1)                                             | 465<br>O16Th8.q0.m1-206<br>8.39 eV (C1)                                             | 466<br>O16Th8.q0.m1-472<br>8.40 eV (C1)                                             | 467<br>O16Th8.q0.m1-116<br>8.45 eV (C1)                                               | 468<br>O16Th8.q0.m1-596<br>8.41 eV (C1)                                               |

| Th <sub>8</sub> O <sub>16</sub> (Continued from previous page)                                                                 |                                                                                                                                |                                                                                                                                 |                                                                                                                                 |                                                                                                                                   |                                                                                                                                   |
|--------------------------------------------------------------------------------------------------------------------------------|--------------------------------------------------------------------------------------------------------------------------------|---------------------------------------------------------------------------------------------------------------------------------|---------------------------------------------------------------------------------------------------------------------------------|-----------------------------------------------------------------------------------------------------------------------------------|-----------------------------------------------------------------------------------------------------------------------------------|
| 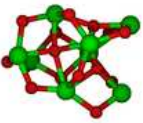<br>469<br>O16Th8.q0.m1-67<br>8.47 eV (C1)    | <br>470<br>O16Th8.q0.m1-91<br>8.56 eV (C1)    | <br>471<br>O16Th8.q0.m1-665<br>8.54 eV (C1)    | <br>472<br>O16Th8.q0.m1-294<br>8.55 eV (C1)    | <br>473<br>O16Th8.q0.m1-623<br>8.56 eV (C1)    | <br>474<br>O16Th8.q0.m1-65<br>8.59 eV (C1)     |
| <br>475<br>O16Th8.q0.m1-680<br>8.59 eV (C1)   | <br>476<br>O16Th8.q0.m1-470<br>8.59 eV (C1)   | <br>477<br>O16Th8.q0.m1-335<br>8.70 eV (C1)    | <br>478<br>O16Th8.q0.m1-482<br>8.77 eV (C1)    | <br>479<br>O16Th8.q0.m1-330<br>8.82 eV (C1)    | <br>480<br>O16Th8.q0.m1-475<br>8.83 eV (C1)    |
| <br>481<br>O16Th8.q0.m1-43<br>8.88 eV (C1)    | <br>482<br>O16Th8.q0.m1-390<br>8.88 eV (C1)   | <br>483<br>O16Th8.q0.m1-16<br>8.89 eV (C1)     | <br>484<br>O16Th8.q0.m1-306<br>8.96 eV (C1)    | <br>485<br>O16Th8.q0.m1-528<br>8.95 eV (C1)    | <br>486<br>O16Th8.q0.m1-471<br>8.94 eV (C1)    |
| <br>487<br>O16Th8.q0.m1-273<br>8.95 eV (C1) | <br>488<br>O16Th8.q0.m1-550<br>9.01 eV (C1) | <br>489<br>O16Th8.q0.m1-565<br>8.99 eV (C1)  | <br>490<br>O16Th8.q0.m1-85<br>9.20 eV (C1)   | <br>491<br>O16Th8.q0.m1-165<br>9.21 eV (C1)  | <br>492<br>O16Th8.q0.m1-329<br>9.24 eV (C1)  |
| <br>493<br>O16Th8.q0.m1-260<br>9.33 eV (C1) | <br>494<br>O16Th8.q0.m1-188<br>9.82 eV (C1) | <br>495<br>O16Th8.q0.m1-778<br>9.81 eV (C1)  | <br>496<br>O16Th8.q0.m1-251<br>9.86 eV (C1)  | <br>497<br>O16Th8.q0.m1-643<br>9.86 eV (C1)  | <br>498<br>O16Th8.q0.m1-777<br>9.88 eV (C1)  |
| <br>499<br>O16Th8.q0.m1-795<br>9.91 eV (C1) | <br>500<br>O16Th8.q0.m1-792<br>9.96 eV (C1) | <br>501<br>O16Th8.q0.m1-558<br>10.08 eV (C1) | <br>502<br>O16Th8.q0.m1-333<br>10.50 eV (C1) | <br>503<br>O16Th8.q0.m1-331<br>10.58 eV (C1) | <br>504<br>O16Th8.q0.m1-664<br>10.98 eV (C1) |

Th<sub>8</sub>O<sub>16</sub> (*Continued from previous page*)

|                                                                                                                                     |                                                                                                                                     |                                                                                                                                      |
|-------------------------------------------------------------------------------------------------------------------------------------|-------------------------------------------------------------------------------------------------------------------------------------|--------------------------------------------------------------------------------------------------------------------------------------|
| 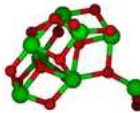 <p>505<br/>O16Th8.q0.m1-551<br/>11.07 eV (C1)</p> |  <p>506<br/>O16Th8.q0.m1-383<br/>11.31 eV (C1)</p> |  <p>507<br/>O16Th8.q0.m1-693<br/>15.34 eV (C1)</p> |
|-------------------------------------------------------------------------------------------------------------------------------------|-------------------------------------------------------------------------------------------------------------------------------------|--------------------------------------------------------------------------------------------------------------------------------------|
